# Supplementary material for: Synthesis of unsymmetrical 2,4-diaryl substituted and 3-bromo-2-(4-bromoalkoxy)-derived pyranocoumarins
Source: Royal Society of Chemistry journal article supplement (doi:10.1039/d4ob01353k), 2024-01-01

## Synthesis of Unsymmetrical 2,4-Diaryl Substituted and 3-Bromo-2-(4-bromoalkoxy)-Derived Pyranocoumarins

Velu Saravanan,<sup>a</sup> Pin-Hui Lin,<sup>b</sup> and Ding-Yah Yang<sup>\*a,b</sup>

<sup>a</sup>Department of Chemistry, Tunghai University

<sup>b</sup>Graduate Program for Biomedical and Materials Science, Tunghai University  
No. 1727, Sec. 4, Taiwan Boulevard, Xitun District, Taichung 407224, Taiwan

\*Corresponding author; Email: [yang@thu.edu.tw](mailto:yang@thu.edu.tw)

### Supporting Information

#### Table of Contents

|                                                                                 |     |
|---------------------------------------------------------------------------------|-----|
| 1. Instrumentation.....                                                         | S2  |
| 2. X-ray crystallographic data of compound <b>1k</b> .....                      | S3  |
| 3. X-ray crystallographic data of compound <b>5a</b> .....                      | S5  |
| 4. Proposed mechanism for Heck coupling reaction.....                           | S7  |
| 5. Scheme for the synthesis of compounds <b>2a-i</b> .....                      | S8  |
| 6. General procedure for preparation of compounds <b>2a-i</b> .....             | S9  |
| 7. Spectral data of compounds <b>2a-i</b> .....                                 | S9  |
| 8. Spectral data of compounds <b>1a-l</b> .....                                 | S12 |
| 9. Spectral data of compounds <b>5a-s</b> .....                                 | S16 |
| 10. References.....                                                             | S23 |
| 11. <sup>1</sup> H & <sup>13</sup> C NMR spectra for synthesized compounds..... | S24 |

## Instrumentation

Melting points were determined on a Mel-Temp melting point apparatus in open capillaries and are uncorrected. Infrared (IR) spectra were recorded using 1725XFT-IR spectrophotometer. High resolution mass spectra (HRMS) were obtained on a Thermo Fisher Scientific Finnigan MAT95XL spectrometer using magnetic sector analyzer.  $^1\text{H}$  NMR (400 MHz) and  $^{13}\text{C}$  NMR (100) spectra were recorded on a Bruker 400 spectrometer. Chemical shifts were reported in parts per million on the scale relative to an internal standard (tetramethylsilane, or appropriate solvent peaks) with coupling constants given in hertz.  $^1\text{H}$  NMR multiplicity data are denoted by s (singlet), d (doublet), t (triplet), q (quartet), m (multiplet). Analytical thin-layer chromatography (TLC) was carried out on Merck silica gel 60G-254 plates (25 mm) and developed with the solvents mentioned. Visualization was accomplished by using portable UV light, ninhydrin spray, or iodine chamber. Flash chromatography was performed in columns of various diameters with Merck silica gel (230–400 mesh ASTM 9385 kieselgel 60H) by elution with the solvent systems. Solvents, unless otherwise specified, were reagent grade and distilled once prior to use. All new compounds exhibited satisfactory spectroscopic and analytical data.

X-ray crystallographic data of compound **1k** (CCDC-2376165)

Single crystal of **1k** was obtained by slow evaporation from a mixture of dichloromethane and n-hexane at 25 °C. Single-crystal X-ray data were collected at 150 K on a Bruker APEX-II CCD diffractometer using graphite-monochromated Mo KR radiation ( $\lambda = 0.71073\text{\AA}$ ). The crystal structures were solved by using SHELXS-97 and the structures were refined using SHELXL-97 2014. All non-hydrogen atoms were refined anisotropically. Hydrogen atoms were fixed at geometrically calculated positions and were refined using riding model.

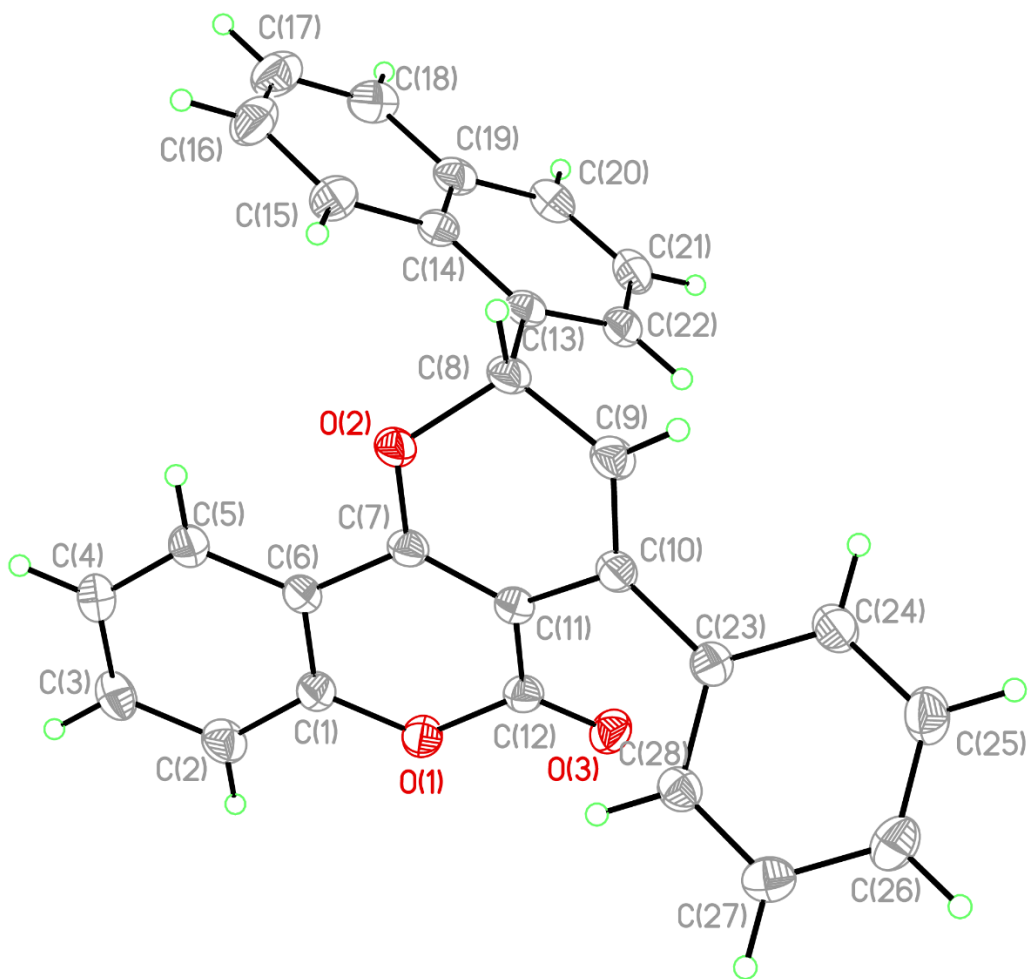

**Figure S1.** ORTEP diagram of compound **1k**. The ellipsoid contour probability levels: 50%

**Table S1.** Crystal data and structure refinement of compound **1k**

|                                   |                                                                                                                           |
|-----------------------------------|---------------------------------------------------------------------------------------------------------------------------|
| Identification code               | VS214                                                                                                                     |
| Empirical formula                 | C <sub>28</sub> H <sub>18</sub> O <sub>3</sub>                                                                            |
| Formula weight                    | 402.42                                                                                                                    |
| Temperature                       | 150(2) K                                                                                                                  |
| Wavelength                        | 0.71073 Å                                                                                                                 |
| Crystal system                    | Triclinic                                                                                                                 |
| Space group                       | P-1                                                                                                                       |
| Unit cell dimensions              | a = 9.8884(5) Å      α = 100.494(2)°.<br>b = 10.0147(5) Å      β = 105.227(2)°.<br>c = 12.1140(7) Å      γ = 115.046(2)°. |
| Volume                            | 987.89(9) Å <sup>3</sup>                                                                                                  |
| Z                                 | 2                                                                                                                         |
| Density (calculated)              | 1.353 Mg/m <sup>3</sup>                                                                                                   |
| Absorption coefficient            | 0.087 mm <sup>-1</sup>                                                                                                    |
| F(000)                            | 420                                                                                                                       |
| Crystal size                      | 0.320 x 0.250 x 0.170 mm <sup>3</sup>                                                                                     |
| Theta range for data collection   | 3.137 to 27.895°.                                                                                                         |
| Index ranges                      | -12 ≤ h ≤ 12, -13 ≤ k ≤ 13, -15 ≤ l ≤ 15                                                                                  |
| Reflections collected             | 19093                                                                                                                     |
| Independent reflections           | 4693 [R(int) = 0.0282]                                                                                                    |
| Completeness to theta = 25.242°   | 99.5 %                                                                                                                    |
| Absorption correction             | Semi-empirical from equivalents                                                                                           |
| Max. and min. transmission        | 0.7456 and 0.6959                                                                                                         |
| Refinement method                 | Full-matrix least-squares on F <sup>2</sup>                                                                               |
| Data / restraints / parameters    | 4693 / 0 / 280                                                                                                            |
| Goodness-of-fit on F <sup>2</sup> | 1.037                                                                                                                     |
| Final R indices [I > 2σ(I)]       | R1 = 0.0492, wR2 = 0.1311                                                                                                 |
| R indices (all data)              | R1 = 0.0563, wR2 = 0.1377                                                                                                 |
| Extinction coefficient            | n/a                                                                                                                       |
| Largest diff. peak and hole       | 1.252 and -0.231 e.Å <sup>-3</sup>                                                                                        |

X-ray crystallographic data of compound **5a** (CCDC-2361150)

Single crystal of **5a** was obtained by slow evaporation from a mixture of dichloromethane and *n*-hexane at 25 °C. Single-crystal X-ray data were collected at 150 K on a Bruker APEX-II CCD diffractometer using graphite-monochromated Mo KR radiation ( $\lambda = 0.71073\text{\AA}$ ). The crystal structures were solved by using SHELXS-97 and the structures were refined using SHELXL-97 2014. All non-hydrogen atoms were refined anisotropically. Hydrogen atoms were fixed at geometrically calculated positions and were refined using riding model.

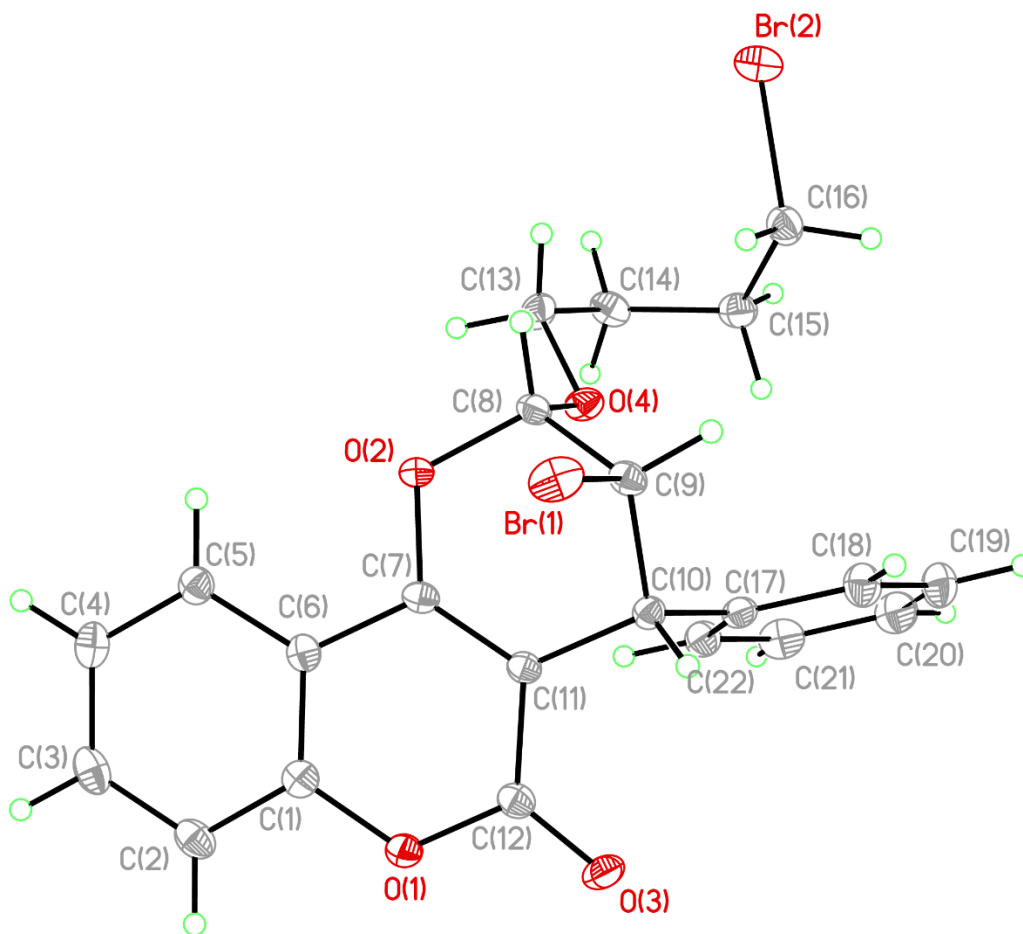

**Figure S2.** ORTEP diagram of compound **5a**. The ellipsoid contour probability levels: 50%

**Table S2.** Crystal data and structure refinement of compound **5a**.

|                                   |                                                                |                                          |
|-----------------------------------|----------------------------------------------------------------|------------------------------------------|
| Identification code               | JNS099                                                         |                                          |
| Empirical formula                 | C <sub>22</sub> H <sub>20</sub> Br <sub>2</sub> O <sub>4</sub> |                                          |
| Formula weight                    | 508.20                                                         |                                          |
| Temperature                       | 150(2) K                                                       |                                          |
| Wavelength                        | 0.71073 Å                                                      |                                          |
| Crystal system                    | Monoclinic                                                     |                                          |
| Space group                       | P2 <sub>1</sub> /n                                             |                                          |
| Unit cell dimensions              | a = 8.8245(4) Å<br>b = 20.8267(8) Å<br>c = 10.7464(5) Å        | a = 90°.<br>b = 101.108(2)°.<br>g = 90°. |
| Volume                            | 1938.03(15) Å <sup>3</sup>                                     |                                          |
| Z                                 | 4                                                              |                                          |
| Density (calculated)              | 1.742 Mg/m <sup>3</sup>                                        |                                          |
| Absorption coefficient            | 4.210 mm <sup>-1</sup>                                         |                                          |
| F(000)                            | 1016                                                           |                                          |
| Crystal size                      | 0.350 x 0.300 x 0.150 mm <sup>3</sup>                          |                                          |
| Theta range for data collection   | 2.910 to 27.889°.                                              |                                          |
| Index ranges                      | -11 ≤ h ≤ 11, -27 ≤ k ≤ 27, -14 ≤ l ≤ 14                       |                                          |
| Reflections collected             | 43618                                                          |                                          |
| Independent reflections           | 4618 [R(int) = 0.0598]                                         |                                          |
| Completeness to theta = 25.242°   | 99.8 %                                                         |                                          |
| Absorption correction             | Semi-empirical from equivalents                                |                                          |
| Max. and min. transmission        | 0.7456 and 0.5528                                              |                                          |
| Refinement method                 | Full-matrix least-squares on F <sup>2</sup>                    |                                          |
| Data / restraints / parameters    | 4618 / 0 / 253                                                 |                                          |
| Goodness-of-fit on F <sup>2</sup> | 1.030                                                          |                                          |
| Final R indices [I > 2σ(I)]       | R1 = 0.0248, wR2 = 0.0650                                      |                                          |
| R indices (all data)              | R1 = 0.0348, wR2 = 0.0693                                      |                                          |
| Extinction coefficient            | n/a                                                            |                                          |
| Largest diff. peak and hole       | 0.372 and -0.694 e.Å <sup>-3</sup>                             |                                          |

Proposed mechanism for Heck coupling reaction

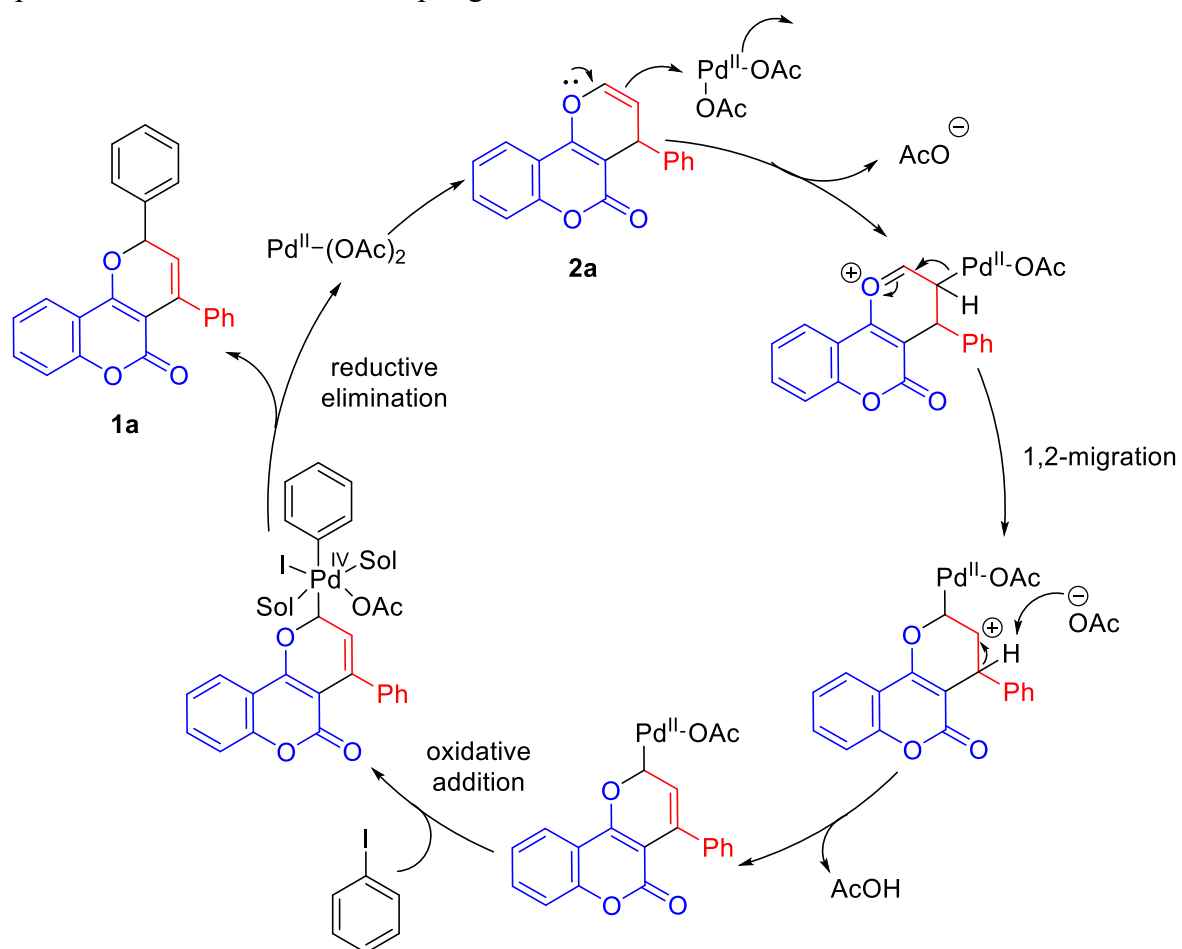

Scheme S1. Proposed mechanism for formation of **1a** from **2a**.

Synthesis of 4-aryl-2*H*,5*H*-pyrano[3,2-*c*]chromen-5-ones **2a-i**.

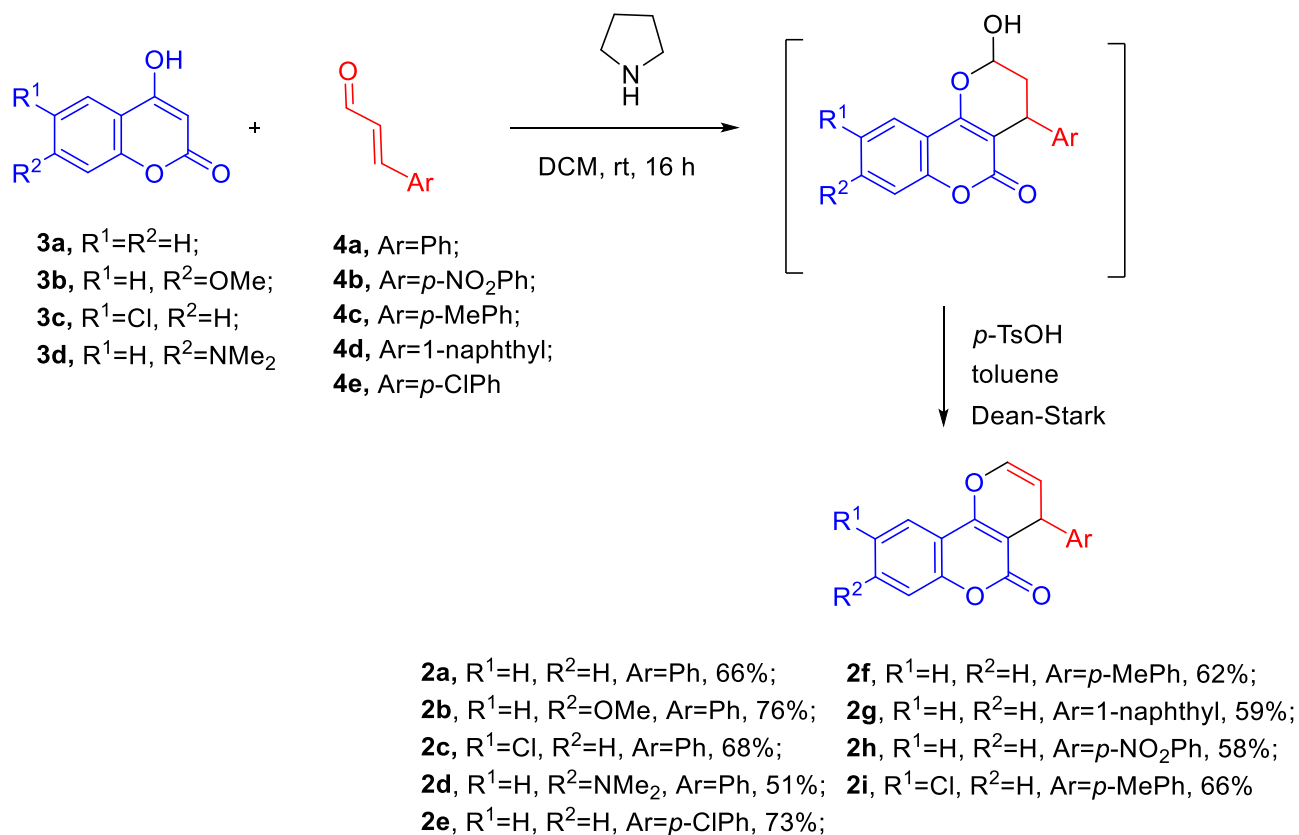

**Scheme S2.** Synthesis of 4-aryl-2*H*,5*H*-pyrano[3,2-*c*]chromen-5-ones **2a-i**.



General procedure for preparation of compounds **2a–i**.

To a solution of  $\alpha,\beta$ -unsaturated aldehyde **4** (2.2 mmol, 1.1 equiv.) and pyrrolidine (0.2 equiv.) in methylene chloride (10 mL) was added 4-hydroxycoumarin **3** (2.0 mmol, 1.0 equiv.) at 0 °C. The reaction mixture was warmed to room temperature. The mixture was then stirred at that temperature for 3–24 h. After consumption of the 4-hydroxycoumarin (monitored by TLC), the mixture was concentrated *in vacuum*. The residue was then redissolved in toluene and was added *p*-TsOH (2.4 mmol, 1.2 equiv.). The resulting mixture was then refluxed under a Dean-Stark trap for overnight. After completion of the reaction (monitored by TLC), the reaction mixture was cooled to room temperature, and the solvent was concentrated under reduced pressure. The residue was then diluted with ethyl acetate (20 mL), washed with water and brine. The organic layer was then dried over anhydrous MgSO<sub>4</sub> and concentrated under reduced pressure to provide the crude product, which was further purified by column chromatography to obtain the desired compound **2**.

Characterization data of prepared compounds

**2a**

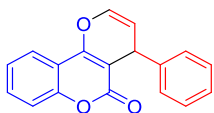

White solid; 364 mg; yield 66%;  $R_f$  = 0.62 (20% EtOAc/hexanes); mp 146–148 °C; <sup>1</sup>H NMR (CDCl<sub>3</sub>, 400 MHz)  $\delta$  7.83 (d,  $J$  = 8.0 Hz, 1H), 7.54 (td,  $J$  = 8.4, 1.6 Hz, 1H), 7.39 (d,  $J$  = 7.2 Hz, 2H), 7.35–7.28 (m, 4H), 7.22 (t,  $J$  = 7.2 Hz, 1H), 6.79 (d,  $J$  = 6.0 Hz, 1H), 5.35 (dd,  $J$  = 6.0, 4.4 Hz, 1H), 4.54 (d,  $J$  = 4.4 Hz, 1H); <sup>13</sup>C NMR (100 MHz, CDCl<sub>3</sub>)  $\delta$  161.4, 155.6, 152.5, 143.5, 138.0, 131.9, 128.5 (2C), 128.3 (2C), 127.1, 124.0, 122.7, 116.6, 114.3, 108.8, 103.7, 35.3; IR  $\nu_{max}$  (KBr) 3027, 1721, 1623, 1395, 1229, 1011, 752, 699 cm<sup>-1</sup>.

**2b**

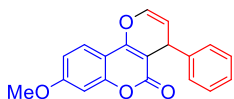

White solid; 465 mg; yield 76%;  $R_f$  = 0.45 (20% EtOAc/hexanes); mp 140–142 °C; <sup>1</sup>H NMR (CDCl<sub>3</sub>, 400 MHz)  $\delta$  7.71 (d,  $J$  = 8.8 Hz, 1H), 7.38 (d,  $J$  = 7.2 Hz, 2H), 7.31 (t,  $J$  = 7.2 Hz, 2H), 7.22 (tt,  $J$  = 7.2, 1.6 Hz, 1H), 6.88 (dd,  $J$  = 8.8, 2.4 Hz, 1H), 6.78 (d,  $J$  = 2.4 Hz, 1H), 6.75 (dd,  $J$  = 6.0, 0.8 Hz, 1H), 5.33 (dd,  $J$  = 6.0, 4.4 Hz, 1H), 4.50 (d,  $J$  = 4.4 Hz, 1H), 3.86 (s, 3H); <sup>13</sup>C NMR (100 MHz, CDCl<sub>3</sub>)  $\delta$  162.8, 161.8, 156.0, 154.3, 143.7, 137.9, 128.4 (2C), 128.3 (2C), 127.0, 123.7, 112.3, 108.9, 107.4, 100.9, 100.4, 55.7, 35.1; IR  $\nu_{max}$  (KBr) 3026, 1719, 1618, 1399, 1233, 1157, 1031, 752,

698  $\text{cm}^{-1}$ ; HRMS (EI)  $m/z$  [ $M^+$ ] calcd for  $\text{C}_{19}\text{H}_{14}\text{O}_4$ , 306.0892; found, 306.0887.

**2c**

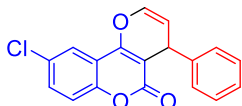

White solid; 422 mg; yield 68%;  $R_f = 0.61$  (20% EtOAc/hexanes); mp 144–146  $^{\circ}\text{C}$ ;  $^1\text{H}$  NMR ( $\text{CDCl}_3$ , 400 MHz)  $\delta$  7.80 (d,  $J = 2.4$  Hz, 1H), 7.47 (dd,  $J = 8.8, 2.4$  Hz, 1H), 7.38–7.35 (m, 2H), 7.34–7.30 (m, 2H), 7.25–7.21 (m, 2H), 6.79 (d,  $J = 6.0$  Hz, 1H), 5.36 (dd,  $J = 6.0, 4.8$  Hz, 1H), 4.53 (d,  $J = 4.8$  Hz, 1H);  $^{13}\text{C}$  NMR (100 MHz,  $\text{CDCl}_3$ )  $\delta$  160.8, 154.5, 150.9, 143.1, 138.0, 131.9, 129.6, 128.5 (2C), 128.4 (2C), 127.3, 122.3, 118.1, 115.4, 108.8, 104.5, 35.2; IR  $\nu_{\text{max}}$  (KBr) 3028, 1723, 1622, 1486, 1228, 1012, 838, 753, 700  $\text{cm}^{-1}$ ; HRMS (EI)  $m/z$  [ $M^+$ ] calcd for  $\text{C}_{18}\text{H}_{11}\text{ClO}_3$ , 310.0397; found, 310.0389.

**2d**

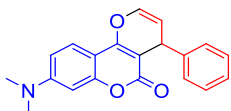

Light pink solid; 325 mg; yield 51%;  $R_f = 0.41$  (20% EtOAc/hexanes); mp 194–196  $^{\circ}\text{C}$ ;  $^1\text{H}$  NMR ( $\text{CDCl}_3$ , 400 MHz)  $\delta$  7.60 (d,  $J = 8.8$  Hz, 1H), 7.37 (dd,  $J = 7.2, 1.2$  Hz, 2H), 7.30 (t,  $J = 7.2$  Hz, 2H), 7.20 (t,  $J = 7.2, 1.2$  Hz, 1H), 6.72 (dd,  $J = 6.0, 0.8$  Hz, 1H), 6.64 (dd,  $J = 8.8, 2.4$  Hz, 1H), 6.47 (d,  $J = 2.4$  Hz, 1H), 5.30 (dd,  $J = 6.0, 4.4$  Hz, 1H), 4.47 (d,  $J = 4.4$  Hz, 1H), 3.04 (s, 6H);  $^{13}\text{C}$  NMR (100 MHz,  $\text{CDCl}_3$ )  $\delta$  162.4, 156.6, 154.6, 152.9, 144.3, 137.9, 128.3 (2C), 128.2 (2C), 126.8, 123.3, 108.9, 108.8, 102.9, 98.6, 97.7, 40.1 (2C), 35.1; IR  $\nu_{\text{max}}$  (KBr) 2919, 1712, 1620, 1527, 1403, 1231, 1169, 1020, 752, 698  $\text{cm}^{-1}$ ; HRMS (EI)  $m/z$  [ $M^+$ ] calcd for  $\text{C}_{20}\text{H}_{17}\text{NO}_3$ , 319.1208; found, 319.1202.

**2e**

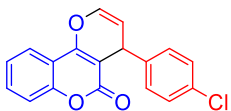

White solid; 453 mg; yield 73%;  $R_f = 0.61$  (20% EtOAc/hexanes); mp 168–170  $^{\circ}\text{C}$ ;  $^1\text{H}$  NMR ( $\text{CDCl}_3$ , 400 MHz)  $\delta$  7.82 (dd,  $J = 8.4, 1.6$  Hz, 1H), 7.55 (td,  $J = 8.4, 1.6$  Hz, 1H), 7.35–7.33 (m, 1H), 7.33–7.28 (m, 4H), 7.28–7.25 (m, 1H), 6.80 (d,  $J = 6.0$  Hz, 1H), 5.32 (t,  $J = 6.0, 4.4$  Hz, 1H), 4.52 (d,  $J = 4.4$  Hz, 1H);  $^{13}\text{C}$  NMR (100 MHz,  $\text{CDCl}_3$ )  $\delta$  161.4, 155.7, 152.5, 142.0, 138.3, 132.9, 132.1, 129.8 (2C), 128.6 (2C), 124.1, 122.7, 116.7, 114.1, 108.4, 103.3, 34.7; IR  $\nu_{\text{max}}$  (KBr) 2923, 1723, 1621, 1492, 1392, 1229,

1044, 1011, 845, 756  $\text{cm}^{-1}$ ; HRMS (EI)  $m/z$  [ $M^+$ ] calcd for  $\text{C}_{18}\text{H}_{11}\text{ClO}_3$ , 310.0397; found, 310.0399.

**2f**

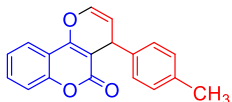

White solid; 360 mg; yield 62%;  $R_f$  = 0.64 (20% EtOAc/hexanes); mp 142–144  $^{\circ}\text{C}$ ;  $^1\text{H}$  NMR ( $\text{CDCl}_3$ , 400 MHz)  $\delta$  7.82 (d,  $J$  = 8.0 Hz, 1H), 7.53 (t,  $J$  = 8.0, 1.2 Hz, 1H), 7.34–7.24 (m, 4H), 7.12 (d,  $J$  = 8.0 Hz, 2H), 6.77 (d,  $J$  = 6.0 Hz, 1H), 5.34 (dd,  $J$  = 6.0, 4.4 Hz, 1H), 4.50 (d,  $J$  = 4.4 Hz, 1H), 2.31 (s, 3H);  $^{13}\text{C}$  NMR (100 MHz,  $\text{CDCl}_3$ )  $\delta$  161.5, 155.5, 152.5, 140.7, 137.9, 136.8, 131.8, 129.2 (2C), 128.2 (2C), 124.0, 122.6, 116.6, 114.3, 109.0, 103.8, 34.8, 21.0; IR  $\nu_{\text{max}}$  (KBr) 2922, 1722, 1622, 1393, 1228, 1207, 1112, 1042, 1010, 758  $\text{cm}^{-1}$ ; HRMS (EI)  $m/z$  [ $M^+$ ] calcd for  $\text{C}_{19}\text{H}_{14}\text{O}_3$ , 290.0943; found, 290.0945.

**2g**

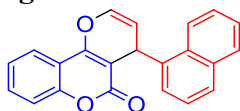

White solid; 385 mg; yield 59%;  $R_f$  = 0.57 (20% EtOAc/hexanes); mp 164–166  $^{\circ}\text{C}$ ;  $^1\text{H}$  NMR ( $\text{CDCl}_3$ , 400 MHz)  $\delta$  8.32 (d,  $J$  = 8.4 Hz, 1H), 7.89 (d,  $J$  = 8.0 Hz, 2H), 7.75 (d,  $J$  = 8.0 Hz, 1H), 7.63–7.55 (m, 2H), 7.52 (t,  $J$  = 7.2 Hz, 1H), 7.43–7.33 (m, 3H), 7.30 (d,  $J$  = 7.2 Hz, 1H), 6.69 (dd,  $J$  = 5.6, 0.8 Hz, 1H), 5.48 (dd,  $J$  = 5.6, 4.4 Hz, 1H), 5.39 (d,  $J$  = 4.4 Hz, 1H);  $^{13}\text{C}$  NMR (100 MHz,  $\text{CDCl}_3$ )  $\delta$  161.4, 156.8, 152.6, 140.2, 137.6, 133.9, 132.0, 130.7, 128.9, 127.6, 126.4, 125.71 (2C), 125.67, 124.1, 122.8, 122.7, 116.8, 114.2, 108.9, 103.0, 30.7; IR  $\nu_{\text{max}}$  (KBr) 2923, 1722, 1621, 1397, 1229, 1040, 1010, 769, 757  $\text{cm}^{-1}$ ; HRMS (EI)  $m/z$  [ $M^+$ ] calcd for  $\text{C}_{22}\text{H}_{14}\text{O}_3$ , 326.0943; found, 326.0648.

**2h**

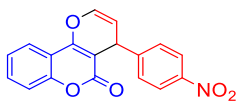

White solid; 372 mg; yield 58%;  $R_f$  = 0.38 (20% EtOAc/hexanes); mp 196–198  $^{\circ}\text{C}$ ;  $^1\text{H}$  NMR ( $\text{CDCl}_3$ , 400 MHz)  $\delta$  8.16 (d,  $J$  = 8.8 Hz, 2H), 7.84 (dd,  $J$  = 8.0, 1.2 Hz, 1H), 7.56 (d,  $J$  = 8.4 Hz, 2H), 7.58 (td,  $J$  = 7.2, 1.2 Hz, 1H), 7.31 (d,  $J$  = 8.8 Hz, 1H), 7.35 (t,  $J$  = 8.0, 0.4 Hz, 1H), 6.85 (dd,  $J$  = 6.0, 0.8 Hz, 1H), 5.32 (dd,  $J$  = 6.0, 4.4 Hz, 1H), 4.67 (d,  $J$  = 4.4 Hz, 1H);  $^{13}\text{C}$  NMR (100 MHz,  $\text{CDCl}_3$ )  $\delta$  161.3, 156.1, 152.6, 150.5, 147.0, 138.9, 132.5, 129.4 (2C), 124.3, 123.8 (2C), 122.8, 116.8, 113.9, 107.5, 102.4, 35.3; IR  $\nu_{\text{max}}$

(KBr) 3077, 1720, 1621, 1518, 1395, 1347, 1231, 1013, 833, 752  $\text{cm}^{-1}$ ;  
HRMS (EI)  $m/z$  [ $M^+$ ] calcd for  $\text{C}_{18}\text{H}_{11}\text{NO}_5$ , 321.0637; found, 321.0641.

**2i**

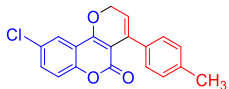

White solid; 428 mg; yield 66%;  $R_f$  = 0.67 (20% EtOAc/hexanes); mp 154–156  $^{\circ}\text{C}$ ;  $^1\text{H}$  NMR ( $\text{CDCl}_3$ , 400 MHz)  $\delta$  7.79 (d,  $J$  = 2.4 Hz, 1H), 7.47 (dd,  $J$  = 8.8, 2.4 Hz, 1H), 7.25 (d,  $J$  = 8.0 Hz, 2H), 7.23 (d,  $J$  = 8.8 Hz, 1H), 7.13 (d,  $J$  = 8.0 Hz, 2H), 6.77 (d,  $J$  = 6.0 Hz, 1H), 5.34 (dd,  $J$  = 6.0, 4.4 Hz, 1H), 4.48 (d,  $J$  = 4.4 Hz, 1H), 2.31 (s, 3H);  $^{13}\text{C}$  NMR (100 MHz,  $\text{CDCl}_3$ )  $\delta$  160.9, 154.4, 150.8, 140.3, 137.9, 137.0, 131.8, 129.6, 129.2 (2C), 128.2 (2C), 122.3, 118.1, 115.4, 109.0, 104.7, 34.8, 21.0; IR  $\nu_{\text{max}}$  (KBr) 2921, 1723, 1622, 1421, 1385, 1227, 1204, 1010, 819  $\text{cm}^{-1}$ ; HRMS (EI)  $m/z$  [ $M^+$ ] calcd for  $\text{C}_{19}\text{H}_{13}\text{ClO}_3$ , 324.0553; found, 324.0557.

**1a**

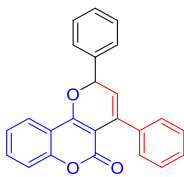

Pale yellow solid; 33 mg; yield 68%;  $R_f$  = 0.63 (30% EtOAc/hexanes); mp 158–160  $^{\circ}\text{C}$  (Lit.<sup>1</sup> 158–160  $^{\circ}\text{C}$ );  $^1\text{H}$  NMR ( $\text{CDCl}_3$ , 400 MHz)  $\delta$  7.86 (dd,  $J$  = 8.0, 1.2 Hz, 1H), 7.59–7.51 (m, 3H), 7.46–7.38 (m, 3H), 7.38–7.33 (m, 5H), 7.30 (d,  $J$  = 8.4 Hz, 1H), 7.29–7.24 (m, 1H), 6.15 (d,  $J$  = 4.4 Hz, 1H), 5.77 (d,  $J$  = 4.4 Hz, 1H).

**1b**

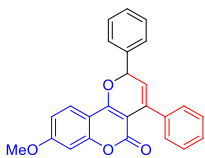

Light brown solid; 32 mg; yield 61%;  $R_f$  = 0.65 (20% EtOAc/hexanes); mp 126–128  $^{\circ}\text{C}$ ;  $^1\text{H}$  NMR ( $\text{CDCl}_3$ , 400 MHz)  $\delta$  7.75 (d,  $J$  = 8.8 Hz, 1H), 7.56 (d,  $J$  = 8.0 Hz, 2H), 7.45–7.38 (m, 3H), 7.37–7.32 (m, 5H), 6.83 (dd,  $J$  = 8.8, 2.4 Hz, 1H), 6.78 (d,  $J$  = 2.4 Hz, 1H), 6.10 (d,  $J$  = 4.0 Hz, 1H), 5.71 (d,  $J$  = 4.0 Hz, 1H), 3.86 (s, 3H);  $^{13}\text{C}$  NMR (100 MHz,  $\text{CDCl}_3$ )  $\delta$  163.6, 161.9, 159.0, 155.5, 138.4, 138.0, 135.3, 129.1, 128.8 (2C), 127.8 (2C), 127.7, 127.4 (3C), 124.4, 119.2, 112.5, 108.3, 100.3 (2C), 78.7, 55.7; IR  $\nu_{\text{max}}$  (KBr) 2925, 1724, 1617, 1405, 1285, 1160, 1028, 755, 699  $\text{cm}^{-1}$ ; HRMS (EI)  $m/z$  [ $M^+$ ] calcd for  $\text{C}_{25}\text{H}_{18}\text{O}_4$ , 382.1205; found, 382.1198.

**1c**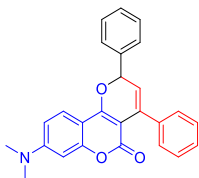

Pink solid; 41 mg; yield 76%;  $R_f = 0.39$  (20% EtOAc/hexanes); mp 128–130 °C;  $^1\text{H NMR}$  ( $\text{CDCl}_3$ , 400 MHz)  $\delta$  7.65 (d,  $J = 8.8$  Hz, 1H), 7.56 (dd,  $J = 8.0$ , 1.6 Hz, 2H), 7.44–7.31 (m, 8H), 6.59 (dd,  $J = 8.8$ , 2.4 Hz, 1H), 6.47 (d,  $J = 2.4$  Hz, 1H), 6.04 (d,  $J = 4.0$  Hz, 1H), 5.64 (d,  $J = 4.0$  Hz, 1H), 3.06 (s, 6H);  $^{13}\text{C NMR}$  (100 MHz,  $\text{CDCl}_3$ )  $\delta$  162.6, 159.6, 155.9, 153.5, 138.9, 138.4, 135.7, 128.9, 128.7 (2C), 127.7 (2C), 127.5, 127.42 (2C), 127.38 (2C), 124.2, 118.1, 108.7, 103.8, 98.2, 97.5, 78.4, 40.1 (2C); IR  $\nu_{\text{max}}$  (KBr) 2924, 1711, 1618, 1578, 1513, 1408, 1175, 755, 698  $\text{cm}^{-1}$ ; HRMS (EI)  $m/z$  [ $\text{M}^+$ ] calcd for  $\text{C}_{26}\text{H}_{21}\text{NO}_3$ , 395.1521; found, 395.1530.

**1d**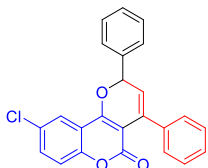

Pale yellow solid; 33 mg; yield 62%;  $R_f = 0.58$  (20% EtOAc/hexanes); mp 198–200 °C (Lit.<sup>2</sup> 203–205 °C);  $^1\text{H NMR}$  ( $\text{CDCl}_3$ , 400 MHz)  $\delta$  7.81 (d,  $J = 2.4$  Hz, 1H), 7.58–7.56 (m, 2H), 7.48 (dd,  $J = 8.8$ , 2.4 Hz, 1H), 7.46–7.41 (m, 3H), 7.39–7.35 (m, 3H), 7.35–7.31 (m, 2H), 7.25 (d,  $J = 9.2$  Hz, 1H), 6.16 (d,  $J = 4.0$  Hz, 1H), 5.79 (d,  $J = 4.0$  Hz, 1H);  $^{13}\text{C NMR}$  (100 MHz,  $\text{CDCl}_3$ )  $\delta$  160.1, 158.1, 151.9, 137.8, 137.5, 134.9, 132.5, 129.5 (3C), 129.0 (2C), 128.0, 127.9, 127.6 (2C), 127.4 (2C), 122.7, 120.7, 118.1, 116.3, 103.3, 79.0; IR  $\nu_{\text{max}}$  (KBr) 3029, 1729, 1630, 1552, 1484, 1393, 1118, 996, 755, 698  $\text{cm}^{-1}$ ; HRMS (EI)  $m/z$  [ $\text{M}^+$ ] calcd for  $\text{C}_{24}\text{H}_{15}\text{ClO}_3$ , 386.0710; found, 386.0720.

**1e**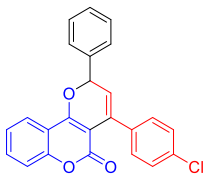

Pale yellow solid; 39 mg; yield 73%;  $R_f = 0.57$  (20% EtOAc/hexanes); mp 190–192 °C;  $^1\text{H NMR}$  ( $\text{CDCl}_3$ , 400 MHz)  $\delta$  7.86 (dd,  $J = 8.0$ , 1.2 Hz, 1H), 7.58–7.52 (m, 3H), 7.46–7.39 (m, 3H), 7.33 (d,  $J = 8.4$  Hz, 2H), 7.31–7.24 (m, 4H), 6.14 (d,  $J = 4.4$  Hz, 1H), 5.75 (d,  $J = 4.4$  Hz, 1H);  $^{13}\text{C NMR}$  (100 MHz,  $\text{CDCl}_3$ )  $\delta$  161.5, 158.6, 153.5, 138.0, 136.3, 134.1, 133.7, 132.8, 129.3, 128.9 (2C), 128.8 (2C), 128.1 (2C), 127.4 (2C), 124.0, 123.3, 120.5, 116.6, 115.0, 102.3, 78.7; IR  $\nu_{\text{max}}$  (KBr) 2920, 1723, 1629, 1609, 1552, 1491, 1405, 990, 756  $\text{cm}^{-1}$ ; HRMS (EI)  $m/z$  [ $\text{M}^+$ ] calcd for  $\text{C}_{24}\text{H}_{15}\text{ClO}_3$ , 386.0710; found, 386.0712.

**1f**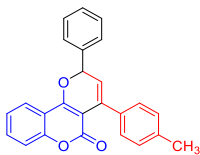

White solid; 36 mg; yield 72%;  $R_f = 0.59$  (20% EtOAc/hexanes); mp 142–144 °C;  $^1\text{H NMR}$  ( $\text{CDCl}_3$ , 400 MHz)  $\delta$  7.85 (dd,  $J = 7.6, 1.2$  Hz, 1H), 7.68–7.51 (m, 3H), 7.45–7.38 (m, 3H), 7.33–7.22 (m, 4H), 7.18 (d,  $J = 8.0$  Hz, 2H), 6.13 (d,  $J = 4.4$  Hz, 1H), 5.75 (d,  $J = 4.4$  Hz, 1H), 2.38 (s, 3H);  $^{13}\text{C NMR}$  (100 MHz,  $\text{CDCl}_3$ )  $\delta$  161.3, 158.7, 153.5, 138.2, 137.6, 135.1, 134.9, 132.5, 129.2, 128.8 (2C), 128.7 (2C), 127.5 (2C), 127.2 (2C), 123.9, 123.2, 119.7, 116.6, 115.2, 102.9, 78.7, 21.3; IR  $\nu_{\text{max}}$  (KBr) 2922, 1727, 1628, 1609, 1552, 1491, 1397, 1107, 988, 756  $\text{cm}^{-1}$ ; HRMS (EI)  $m/z$  [ $\text{M}^+$ ] calcd for  $\text{C}_{25}\text{H}_{18}\text{O}_3$ , 366.1256; found, 366.1246.

**1g**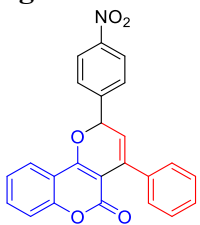

Brown solid; 30 mg; yield 54%;  $R_f = 0.66$  (30% EtOAc/hexanes); mp 192–194 °C;  $^1\text{H NMR}$  ( $\text{CDCl}_3$ , 400 MHz)  $\delta$  8.29 (d,  $J = 8.8$  Hz, 2H), 7.87 (dd,  $J = 8.0, 1.2$  Hz, 1H), 7.74 (d,  $J = 8.4$  Hz, 2H), 7.59 (td,  $J = 8.4, 1.6$  Hz, 1H), 7.40–7.35 (m, 3H), 7.35–7.29 (m, 4H), 6.24 (d,  $J = 4.4$  Hz, 1H), 5.75 (d,  $J = 4.4$  Hz, 1H);  $^{13}\text{C NMR}$  (100 MHz,  $\text{CDCl}_3$ )  $\delta$  161.0, 158.2, 153.6, 148.2, 145.1, 137.3, 136.1, 133.0, 128.1, 127.94 (2C), 127.89 (2C), 127.3 (2C), 124.14, 124.07 (2C), 123.0, 118.8, 116.7, 114.7, 103.0, 77.2; IR  $\nu_{\text{max}}$  (KBr) 2920, 1725, 1632, 1523, 1348, 754, 699  $\text{cm}^{-1}$ ; HRMS (EI)  $m/z$  [ $\text{M}^+$ ] calcd for  $\text{C}_{24}\text{H}_{15}\text{NO}_5$ , 397.0950; found, 397.0959.

**1h**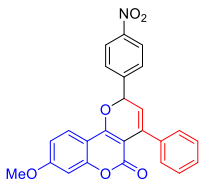

Brown solid; 31 mg; yield 53%;  $R_f = 0.33$  (20% EtOAc/hexanes); mp 174–176 °C;  $^1\text{H NMR}$  ( $\text{CDCl}_3$ , 400 MHz)  $\delta$  8.28 (d,  $J = 8.4$  Hz, 2H), 7.76 (d,  $J = 8.8$  Hz, 1H), 7.73 (d,  $J = 8.4$  Hz, 2H), 7.38–7.30 (m, 5H), 6.87 (dd,  $J = 8.8, 2.4$  Hz, 1H), 6.80 (d,  $J = 2.4$  Hz, 1H), 6.19 (d,  $J = 4.4$  Hz, 1H), 5.68 (d,  $J = 4.4$  Hz, 1H), 3.88 (s, 3H);  $^{13}\text{C NMR}$  (100 MHz,  $\text{CDCl}_3$ )  $\delta$  163.9, 161.6, 158.7, 155.6, 148.2, 145.4, 137.4, 136.3, 128.1, 127.93 (2C), 127.88 (2C), 127.3 (2C), 124.2, 124.1 (2C), 117.7, 112.8, 107.9, 100.5, 100.4, 77.1, 55.8; IR  $\nu_{\text{max}}$  (KBr) 3365, 1727, 1615, 1529, 1402, 1161, 756  $\text{cm}^{-1}$ ; HRMS (EI)  $m/z$  [ $\text{M}^+$ ] calcd for  $\text{C}_{25}\text{H}_{17}\text{NO}_6$ , 427.1056; found, 427.1050.

**1i**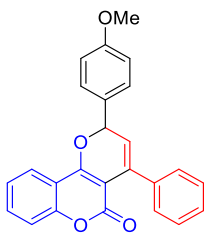

Pale yellow solid; 27 mg; yield 52%;  $R_f = 0.29$  (30% EtOAc/hexanes); mp 122–124 °C;  $^1\text{H NMR}$  ( $\text{CDCl}_3$ , 400 MHz)  $\delta$  7.83 (dd,  $J = 8.0, 1.2$  Hz, 1H), 7.55–7.48 (m, 3H), 7.40–7.32 (m, 5H), 7.29 (d,  $J = 8.4$  Hz, 1H), 7.23 (d,  $J = 7.6$  Hz, 1H), 6.93 (d,  $J = 8.8$  Hz, 2H), 6.10 (d,  $J = 4.4$  Hz, 1H), 5.76 (d,  $J = 4.4$  Hz, 1H), 3.82 (s, 3H);  $^{13}\text{C NMR}$  (100 MHz,  $\text{CDCl}_3$ )  $\delta$  161.2, 160.4, 158.8, 153.5, 137.9, 135.1, 132.5, 129.9, 129.4 (2C), 127.9, 127.8 (2C), 127.4 (2C), 123.8, 123.3, 120.2, 116.5, 115.3, 114.2 (2C), 102.6, 78.5, 55.3; IR  $\nu_{\text{max}}$  (KBr) 2925, 1737, 1614, 1585, 1483, 1457, 1364, 1033  $\text{cm}^{-1}$ ; HRMS (EI)  $m/z$  [ $\text{M}^+$ ] calcd for  $\text{C}_{25}\text{H}_{18}\text{O}_4$ , 382.1205; found, 382.1199.

**1j**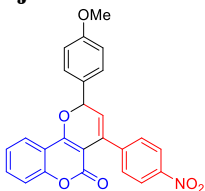

Brown solid; 43 mg; yield 73%;  $R_f = 0.33$  (30% EtOAc/hexanes); mp 156–158 °C;  $^1\text{H NMR}$  ( $\text{CDCl}_3$ , 400 MHz)  $\delta$  8.22 (d,  $J = 8.8$  Hz, 2H), 7.84 (d,  $J = 7.6$  Hz, 1H), 7.56 (t,  $J = 7.6$  Hz, 1H), 7.48 (d,  $J = 8.4$  Hz, 4H), 7.33–7.24 (m, 2H), 6.95 (d,  $J = 8.4$  Hz, 2H), 6.16 (d,  $J = 4.4$  Hz, 1H), 5.82 (d,  $J = 4.0$  Hz, 1H), 3.82 (s, 3H);  $^{13}\text{C NMR}$  (100 MHz,  $\text{CDCl}_3$ )  $\delta$  161.7, 160.6, 158.8, 153.5, 147.3, 144.9, 133.4, 133.0, 129.4, 129.3 (2C), 128.4 (2C), 124.2, 123.4, 123.2 (2C), 122.0, 116.7, 115.0, 114.4 (2C), 101.6, 78.5, 55.3; IR  $\nu_{\text{max}}$  (KBr) 3441, 1717, 1609, 1515, 1345, 1252, 1175, 1033, 755  $\text{cm}^{-1}$ ; HRMS (EI)  $m/z$  [ $\text{M}^+$ ] calcd for  $\text{C}_{25}\text{H}_{17}\text{NO}_6$ , 427.1056; found, 427.1046.

**1k**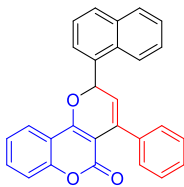

White solid; 35 mg; yield 63%;  $R_f = 0.53$  (20% EtOAc/hexanes); mp 184–186 °C;  $^1\text{H NMR}$  ( $\text{CDCl}_3$ , 400 MHz)  $\delta$  8.38 (d,  $J = 8.4$  Hz, 1H), 7.92 (t,  $J = 9.2$  Hz, 2H), 7.81 (d,  $J = 7.2$  Hz, 1H), 7.75 (dd,  $J = 7.6, 1.2$  Hz, 1H), 7.64 (t,  $J = 7.2$  Hz, 1H), 7.57 (t,  $J = 7.2$  Hz, 1H), 7.53–7.47 (m, 2H), 7.43–7.35 (m, 5H), 7.28 (d,  $J = 8.4$  Hz, 1H), 7.18 (t,  $J = 7.2$  Hz, 1H), 6.90 (d,  $J = 4.4$  Hz, 1H), 5.87 (d,  $J = 4.4$  Hz, 1H);  $^{13}\text{C NMR}$  (100 MHz,  $\text{CDCl}_3$ )  $\delta$  161.6, 158.7, 153.5, 137.8, 135.8, 134.2, 132.5, 132.4, 131.0, 130.1, 129.1 (2C), 127.91 (2C), 127.88, 127.4, 126.8, 126.4, 126.0, 125.1, 123.8, 123.5, 123.3, 119.8, 116.5, 115.2, 102.9, 76.1; IR  $\nu_{\text{max}}$  (KBr) 3016, 1727, 1629, 1609, 1553, 1491, 1400, 1107, 753, 699  $\text{cm}^{-1}$ ; HRMS (EI)  $m/z$  [ $\text{M}^+$ ] calcd for  $\text{C}_{28}\text{H}_{18}\text{O}_3$ , 402.1256; found, 402.1250.

**11**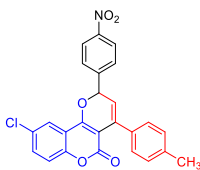

White solid; 37 mg; yield 61%;  $R_f = 0.49$  (20% EtOAc/hexanes); mp 182–184 °C;  $^1\text{H NMR}$  ( $\text{CDCl}_3$ , 400 MHz)  $\delta$  8.31 (d,  $J = 8.8$  Hz, 2H), 7.80 (d,  $J = 2.4$  Hz, 1H), 7.73 (d,  $J = 8.8$  Hz, 2H), 7.52 (dd,  $J = 8.8, 2.4$  Hz, 1H), 7.27 (d,  $J = 8.8$  Hz, 1H), 7.2 (dd,  $J = 8.4, 6.0$  Hz, 4H), 6.23 (d,  $J = 4.4$  Hz, 1H), 5.74 (d,  $J = 4.4$  Hz, 1H), 2.38 (s, 3H);  $^{13}\text{C NMR}$  (100 MHz,  $\text{CDCl}_3$ )  $\delta$  159.8, 157.7, 151.9, 148.4, 144.8, 138.2, 135.8, 134.0, 132.9, 129.7, 128.8 (2C), 128.1 (2C), 127.2 (2C), 124.2 (2C), 122.5, 118.8, 118.2, 115.9, 103.8, 77.5, 21.3; IR  $\nu_{\text{max}}$  (KBr) 2921, 1730, 1630, 1551, 1522, 1348, 1118, 998, 820, 755  $\text{cm}^{-1}$ ; HRMS (EI)  $m/z$  [ $\text{M}^+$ ] calcd for  $\text{C}_{25}\text{H}_{16}\text{ClNO}_5$ , 445.0717; found, 445.0715.

**5a**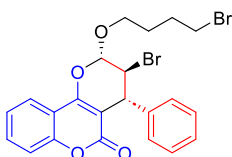

White solid; 44 mg; yield 63%;  $R_f = 0.58$  (20% EtOAc/hexanes); mp 118–120 °C;  $^1\text{H NMR}$  ( $\text{CDCl}_3$ , 400 MHz)  $\delta$  7.91 (dd,  $J = 7.6, 1.2$  Hz, 1H), 7.61 (td,  $J = 8.8, 1.2$  Hz, 1H), 7.40 (d,  $J = 8.8$  Hz, 1H), 7.36 (td,  $J = 8.8, 0.8$  Hz, 1H), 7.29–7.18 (m, 5H), 5.52 (d,  $J = 2.4$  Hz, 1H), 4.58 (t,  $J = 2.4$  Hz, 1H), 4.52 (d,  $J = 2.4$  Hz, 1H), 3.90–3.85 (m, 1H), 3.56–3.50 (m, 1H), 3.17 (t,  $J = 6.0$  Hz, 2H), 1.60–1.40 (m, 4H);  $^{13}\text{C NMR}$  (100 MHz,  $\text{CDCl}_3$ )  $\delta$  161.4, 157.2, 152.9, 139.6, 132.2, 128.2, 127.8 (2C), 127.1 (2C), 124.1, 122.7, 116.8, 115.0, 101.0 (2C), 69.2, 47.3, 44.0, 33.1, 28.8, 27.8; IR  $\nu_{\text{max}}$  (KBr) 2930, 1719, 1634, 1611, 1493, 1400, 1126, 1079, 953, 756  $\text{cm}^{-1}$ ; HRMS (EI)  $m/z$  [ $\text{M}^+$ ] calcd for  $\text{C}_{22}\text{H}_{20}\text{Br}_2\text{O}_4$ , 505.9728; found, 505.9722.

**5b**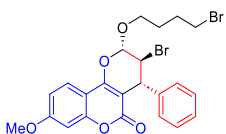

White solid; 48 mg; yield 65%;  $R_f = 0.41$  (20% EtOAc/hexanes); mp 130–132 °C;  $^1\text{H NMR}$  ( $\text{CDCl}_3$ , 400 MHz)  $\delta$  7.80 (d,  $J = 8.8$  Hz, 1H), 7.30–7.17 (m, 5H), 6.92 (dd,  $J = 8.8, 2.4$  Hz, 1H), 6.87 (d,  $J = 2.4$  Hz, 1H), 5.48 (d,  $J = 2.4$  Hz, 1H), 4.56 (t,  $J = 2.4$  Hz, 1H), 4.48 (d,  $J = 1.6$  Hz, 1H), 3.89 (s, 3H), 3.87–3.80 (m, 1H), 3.56–3.45 (m, 1H), 3.17 (t,  $J = 5.6$  Hz, 2H), 1.60–1.40 (m, 4H);  $^{13}\text{C NMR}$  (100 MHz,  $\text{CDCl}_3$ )  $\delta$  163.1, 161.8, 157.6, 154.6, 139.8, 128.1 (2C), 127.7 (2C), 126.9, 123.7, 112.3, 108.1, 100.8, 100.5, 97.8, 69.1, 55.7, 47.6, 43.9, 33.1, 28.7, 27.8; IR  $\nu_{\text{max}}$  (KBr) 2925, 1721, 1635,



1574, 1484, 1097, 952, 756  $\text{cm}^{-1}$ ; HRMS (EI)  $m/z$  [ $\text{M}^+$ ] calcd for  $\text{C}_{23}\text{H}_{22}\text{Br}_2\text{O}_5$ , 535.9834; found, 535.9843.

**5c**

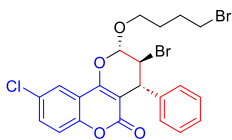

White solid; 58 mg; yield 78%;  $R_f$  = 0.58 (20% EtOAc/hexanes); mp 154–156  $^{\circ}\text{C}$ ;  $^1\text{H}$  NMR ( $\text{CDCl}_3$ , 400 MHz)  $\delta$  7.88 (d,  $J$  = 2.4 Hz, 1H), 7.55 (dd,  $J$  = 8.8, 2.4 Hz, 1H), 7.34 (d,  $J$  = 8.8 Hz, 1H), 7.30–7.18 (m, 5H), 5.53 (d,  $J$  = 2.0 Hz, 1H), 4.59 (t,  $J$  = 2.4 Hz, 1H), 4.51 (d,  $J$  = 2.0 Hz, 1H), 3.91–3.85 (m, 1H), 3.57–3.49 (m, 1H), 3.21–3.10 (m, 2H), 1.55–1.43 (m, 4H);  $^{13}\text{C}$  NMR (100 MHz,  $\text{CDCl}_3$ )  $\delta$  160.9, 156.2, 151.3, 139.2, 132.2, 129.7, 128.3 (2C), 127.7 (2C), 127.2, 122.3, 118.3, 116.1, 101.6, 101.1, 69.4, 46.9, 43.9, 33.1, 28.8, 27.8; IR  $\nu_{\text{max}}$  (KBr) 3434, 1720, 1636, 1574, 1483, 1097, 952, 755, 719  $\text{cm}^{-1}$ ; HRMS (EI)  $m/z$  [ $\text{M}^+$ ] calcd for  $\text{C}_{22}\text{H}_{19}\text{Br}_2\text{ClO}_4$ , 539.9339; found, 539.9332.

**5d**

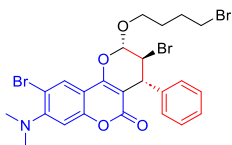

White solid; 51 mg; yield 58%;  $R_f$  = 0.60 (20% EtOAc/hexanes); mp 118–120  $^{\circ}\text{C}$ ;  $^1\text{H}$  NMR ( $\text{CDCl}_3$ , 400 MHz)  $\delta$  8.03 (s, 1H), 7.28–7.17 (m, 5H), 6.98 (s, 1H), 5.49 (d,  $J$  = 2.0 Hz, 1H), 4.57 (t,  $J$  = 2.4 Hz, 1H), 4.48 (d,  $J$  = 1.6 Hz, 1H), 3.90–3.84 (m, 1H), 3.55–3.48 (m, 1H), 3.19–3.14 (m, 2H), 2.92 (s, 6H), 1.54–1.45 (m, 4H);  $^{13}\text{C}$  NMR (100 MHz,  $\text{CDCl}_3$ )  $\delta$  161.6, 156.6, 155.5, 153.2, 139.7, 128.3 (2C), 127.8 (2C), 127.7, 127.1, 112.7, 110.0, 107.7, 101.0, 98.9, 69.3, 47.3, 43.9, 43.8 (2C), 33.3, 28.9, 27.9; IR  $\nu_{\text{max}}$  (KBr) 2923, 1718, 1626, 1608, 1396, 1135, 1081, 954, 754  $\text{cm}^{-1}$ ; HRMS (EI)  $m/z$  [ $\text{M}^+$ ] calcd for  $\text{C}_{24}\text{H}_{24}\text{Br}_3\text{NO}_4$ , 636.9255; found, 636.9255.

**5e**

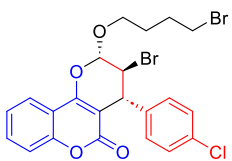

White solid; 57 mg; yield 76%;  $R_f$  = 0.56 (20% EtOAc/hexanes); mp 112–114  $^{\circ}\text{C}$ ;  $^1\text{H}$  NMR ( $\text{CDCl}_3$ , 400 MHz)  $\delta$  7.92 (d,  $J$  = 8.8 Hz, 1H), 7.62 (td,  $J$  = 8.4, 1.2 Hz, 1H), 7.40 (d,  $J$  = 8.4 Hz, 1H), 7.37 (t,  $J$  = 7.6 Hz, 1H), 7.25 (d,  $J$  = 8.8 Hz, 2H), 7.16 (d,  $J$  = 8.4 Hz, 2H), 5.52 (d,  $J$  = 2.4 Hz, 1H), 4.51 (t,  $J$  = 2.4 Hz, 1H), 4.48 (s, 1H), 3.93–3.83 (m, 1H), 3.60–3.51 (m, 1H), 3.25–3.17 (m, 2H), 1.58–1.46 (m, 4H);  $^{13}\text{C}$  NMR (100 MHz,  $\text{CDCl}_3$ )  $\delta$  161.4, 157.4, 152.9, 138.2, 132.8, 132.4, 129.2 (2C), 128.4 (2C), 124.2,

122.7, 116.9, 114.8, 100.9, 100.3, 69.4, 46.8, 43.5, 33.0, 28.9, 27.9; IR  $\nu_{max}$  (KBr) 2922, 1717, 1634, 1491, 1412, 1126, 1091, 1078, 955, 759  $\text{cm}^{-1}$ ; HRMS (EI)  $m/z$  [ $M^+$ ] calcd for  $\text{C}_{22}\text{H}_{19}\text{Br}_2\text{ClO}_4$ , 539.9339; found, 539.9334.

**5f**

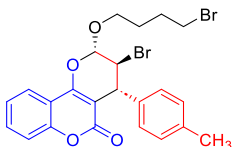

White solid; 56 mg; yield 78%;  $R_f$  = 0.60 (20% EtOAc/hexanes); mp 136–138  $^{\circ}\text{C}$ ;  $^1\text{H}$  NMR ( $\text{CDCl}_3$ , 400 MHz)  $\delta$  7.91 (d,  $J$  = 6.8 Hz, 1H), 7.60 (td,  $J$  = 8.4, 1.2 Hz, 1H), 7.39 (d,  $J$  = 8.8 Hz, 1H), 7.36 (t,  $J$  = 8.8 Hz, 1H), 7.08 (q,  $J$  = 8.0 Hz, 4H), 5.51 (d,  $J$  = 2.4 Hz, 1H), 4.55 (d,  $J$  = 2.4 Hz, 1H), 4.48 (s, 1H), 3.92–3.84 (m, 1H), 3.59–3.49 (m, 1H), 3.22–3.12 (m, 2H), 2.30 (s, 3H), 3.92–3.84 (m, 4H);  $^{13}\text{C}$  NMR (100 MHz,  $\text{CDCl}_3$ )  $\delta$  161.4, 157.1, 152.9, 136.7, 136.6, 132.2, 129.0 (2C), 127.7 (2C), 124.1, 122.7, 116.8, 115.0, 100.99, 101.0, 69.3, 47.6, 43.8, 33.1, 28.9, 27.9, 21.1; IR  $\nu_{max}$  (KBr) 3429, 1717, 1639, 1611, 1398, 1327, 1126, 1078, 955, 759  $\text{cm}^{-1}$ ; HRMS (EI)  $m/z$  [ $M^+$ ] calcd for  $\text{C}_{23}\text{H}_{22}\text{Br}_2\text{O}_4$ , 519.9885; found, 519.9878.

**5g**

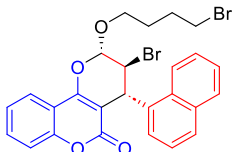

White solid; 47 mg; yield 61%;  $R_f$  = 0.54 (20% EtOAc/hexanes); mp 158–160  $^{\circ}\text{C}$ ;  $^1\text{H}$  NMR ( $\text{CDCl}_3$ , 400 MHz)  $\delta$  8.14 (d,  $J$  = 8.8 Hz, 1H), 7.98 (dd,  $J$  = 8.0, 1.2 Hz, 1H), 7.92 (d,  $J$  = 8.0 Hz, 1H), 7.76 (d,  $J$  = 8.0 Hz, 1H), 7.68–7.61 (m, 2H), 7.54 (t,  $J$  = 7.6 Hz, 1H), 7.43 (d,  $J$  = 8.8 Hz, 1H), 7.40 (t,  $J$  = 8.0 Hz, 1H), 7.29 (t,  $J$  = 8.0 Hz, 1H), 7.19 (d,  $J$  = 7.2 Hz, 1H), 5.56 (s, 1H), 5.20 (s, 1H), 4.73 (s, 1H), 3.86–3.78 (m, 1H), 3.48–3.38 (m, 1H), 3.10 (t,  $J$  = 6.0 Hz, 2H), 1.48–1.34 (m, 4H);  $^{13}\text{C}$  NMR (100 MHz,  $\text{CDCl}_3$ )  $\delta$  161.5, 157.5, 153.0, 134.6, 134.2, 132.3, 130.9, 129.5, 128.1, 126.8, 125.5, 124.9 (2C), 124.2, 122.7, 122.4, 116.9, 115.1, 100.7, 100.4, 69.2, 45.1, 40.5, 33.0, 28.8, 27.8; IR  $\nu_{max}$  (KBr) 3419, 1717, 1635, 1611, 1399, 1126, 1077, 955, 754  $\text{cm}^{-1}$ ; HRMS (EI)  $m/z$  [ $M^+$ ] calcd for  $\text{C}_{26}\text{H}_{22}\text{Br}_2\text{O}_4$ , 555.9885; found, 555.9892.

**5h**

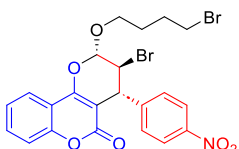

White solid; 58 mg; yield 77%;  $R_f$  = 0.36 (20% EtOAc/hexanes); mp 158–160  $^{\circ}\text{C}$ ;  $^1\text{H}$  NMR ( $\text{CDCl}_3$ , 400 MHz)  $\delta$  8.15 (d,  $J$  = 8.8 Hz, 2H), 7.93 (dd,  $J$  = 8.0, 1.2 Hz, 1H), 7.65 (td,  $J$  = 8.4, 1.2 Hz, 1H), 7.37–7.44 (m, 4H), 5.55

(d,  $J = 2.4$  Hz, 1H), 4.57 (d,  $J = 2.4$  Hz, 1H), 4.53 (t,  $J = 2.4$  Hz, 1H), 3.92–3.84 (m, 1H), 3.62–3.54 (m, 1H), 3.18 (t,  $J = 6.0$  Hz, 2H), 1.56–1.43 (m, 4H);  $^{13}\text{C}$  NMR (100 MHz,  $\text{CDCl}_3$ )  $\delta$  161.3, 157.8, 152.9, 147.2, 146.9, 132.7, 128.8 (2C), 124.4, 123.5 (2C), 122.8, 116.9, 114.6, 100.6, 99.4, 69.6, 45.7, 43.8, 32.7, 28.8, 27.8; IR  $\nu_{\text{max}}$  (KBr) 2922, 1713, 1634, 1609, 1519, 1399, 1347, 1126, 1078, 953, 754  $\text{cm}^{-1}$ ; HRMS (EI)  $m/z$  [ $\text{M}^+$ ] calcd for  $\text{C}_{22}\text{H}_{19}\text{Br}_2\text{NO}_6$ , 550.9579; found, 550.9573.

5i

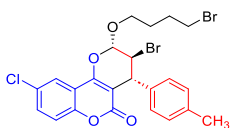

White solid; 59 mg; yield 77%;  $R_f = 0.62$  (20% EtOAc/hexanes); mp 122–124  $^\circ\text{C}$ ;  $^1\text{H}$  NMR ( $\text{CDCl}_3$ , 400 MHz)  $\delta$  7.88 (d,  $J = 2.4$  Hz, 1H), 7.54 (dd,  $J = 8.8, 2.4$  Hz, 1H), 7.33 (d,  $J = 9.2$  Hz, 1H), 7.08 (s, 4H), 5.52 (d,  $J = 2.4$  Hz, 1H), 4.55 (t,  $J = 2.4$  Hz, 1H), 4.47 (d,  $J = 2.4$  Hz, 1H), 3.94–3.85 (m, 1H), 3.50–3.58 (m, 1H), 3.11–3.22 (m, 2H), 2.30 (s, 3H), 1.60–1.48 (m, 4H);  $^{13}\text{C}$  NMR (100 MHz,  $\text{CDCl}_3$ )  $\delta$  160.9, 156.1, 151.3, 136.8, 136.3, 132.2, 129.7, 129.0 (2C), 127.7 (2C), 122.3, 118.4, 116.2, 101.9, 101.2, 69.5, 47.2, 43.8, 33.0, 29.0, 28.0, 21.1; IR  $\nu_{\text{max}}$  (KBr) 2922, 1721, 1635, 1486, 1422, 1097, 1073, 954, 914, 756  $\text{cm}^{-1}$ ; HRMS (EI)  $m/z$  [ $\text{M}^+$ ] calcd for  $\text{C}_{23}\text{H}_{21}\text{Br}_2\text{ClO}_4$ , 553.9495; found, 553.9490.

5j

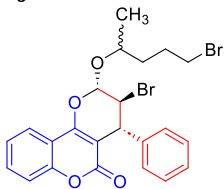

White solid; 51 mg; yield 71% (two inseparable isomers);  $R_f = 0.58$  (20% EtOAc/hexanes); mp 122–124  $^\circ\text{C}$ ;  $^1\text{H}$  NMR ( $\text{CDCl}_3$ , 400 MHz) (peaks overlapped for both isomers)  $\delta$  7.92 (d,  $J = 8.0$  Hz, 1H), 7.60 (d,  $J = 8.0$  Hz, 1H), 7.39 (d,  $J = 8.4$  Hz, 1H), 7.36 (t,  $J = 7.6$  Hz, 1H), 7.30–7.19 (m, 5H), 5.52 (d,  $J = 2.4$  Hz, 1H), 4.59 (t,  $J = 2.4$  Hz, 1H), 4.52 (d,  $J = 2.4$  Hz, 1H), 3.93–3.81 (m, 2H), 3.59–3.48 (m, 1H), 1.65–1.31 (m, 7H);  $^{13}\text{C}$  NMR (100 MHz,  $\text{CDCl}_3$ ) isomer one  $\delta$  161.4, 157.2, 152.9, 139.7, 139.6, 132.2, 128.3, 128.2, 127.8, 127.1, 127.0, 124.1, 122.7, 116.8, 115.0, 100.9, 69.5, 51.2, 47.2, 44.0, 37.1, 27.8, 26.4; isomer two  $\delta$  161.4, 157.2, 152.9, 139.7, 139.6, 132.2, 128.3, 128.2, 127.8, 127.1, 127.0, 124.1, 122.7, 116.8, 115.0, 101.0, 100.7, 69.6, 50.9, 47.3, 44.1, 27.5, 26.3; IR  $\nu_{\text{max}}$  (KBr) 2925, 1719, 1634, 1611, 1399, 1126, 1083, 953, 756  $\text{cm}^{-1}$ ; HRMS (EI)  $m/z$  [ $\text{M}^+$ ] calcd for  $\text{C}_{23}\text{H}_{22}\text{Br}_2\text{O}_4$ , 519.9885; found, 519.9886.

**5k**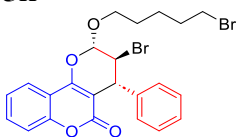

White solid; 52 mg; yield 72%;  $R_f$  = 0.60 (20% EtOAc/hexanes); mp 122–124 °C;  $^1\text{H NMR}$  ( $\text{CDCl}_3$ , 400 MHz)  $\delta$  7.92 (dd,  $J$  = 8.0, 1.2 Hz, 1H), 7.61 (td,  $J$  = 8.4, 1.2 Hz, 1H), 7.39 (d,  $J$  = 8.4 Hz, 1H), 7.37 (t,  $J$  = 8.0 Hz, 1H), 7.29–7.17 (m, 5H), 5.52 (d,  $J$  = 2.8 Hz, 1H), 4.58 (t,  $J$  = 2.8 Hz, 1H), 4.52 (d,  $J$  = 2.4 Hz, 1H), 3.90–3.80 (m, 1H), 3.55–3.45 (m, 1H), 3.23 (t,  $J$  = 6.8 Hz, 2H), 1.70–1.00 (m, 6H);  $^{13}\text{C NMR}$  (100 MHz,  $\text{CDCl}_3$ )  $\delta$  161.5, 157.3, 152.9, 139.6, 132.2, 128.2 (2C), 127.9 (2C), 127.0, 124.1, 122.7, 116.8, 115.0, 101.0, 100.7, 69.9, 47.4, 44.1, 33.4, 32.1, 28.3, 24.4; IR  $\nu_{\text{max}}$  (KBr) 3445, 1718, 1634, 1611, 1492, 1400, 1082, 758, 697  $\text{cm}^{-1}$ ; HRMS (EI)  $m/z$  [ $\text{M}^+$ ] calcd for  $\text{C}_{23}\text{H}_{22}\text{Br}_2\text{O}_4$ , 519.9885; found, 519.9877.

**5l**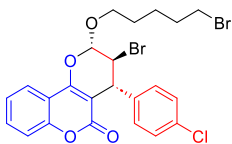

White solid; 53 mg; yield 69%;  $R_f$  = 0.58 (20% EtOAc/hexanes); mp 116–118 °C;  $^1\text{H NMR}$  ( $\text{CDCl}_3$ , 400 MHz)  $\delta$  7.92 (d,  $J$  = 8.0 Hz, 1H), 7.61 (td,  $J$  = 8.4, 1.2 Hz, 1H), 7.40 (d,  $J$  = 8.4 Hz, 1H), 7.37 (t,  $J$  = 7.6 Hz, 1H), 7.24 (d,  $J$  = 8.4 Hz, 2H), 7.17 (d,  $J$  = 8.4 Hz, 2H), 5.52 (d,  $J$  = 2.4 Hz, 1H), 4.51 (t,  $J$  = 2.4 Hz, 1H), 4.47 (s, 1H), 3.90–3.79 (m, 1H), 3.59–3.47 (m, 1H), 3.34–3.19 (m, 2H), 1.68 (quintet,  $J$  = 7.2 Hz, 2H), 1.43–1.33 (m, 2H), 1.26–1.07 (m, 2H);  $^{13}\text{C NMR}$  (100 MHz,  $\text{CDCl}_3$ )  $\delta$  161.4, 157.4, 153.0, 138.3, 132.8, 132.4, 129.4 (2C), 128.3 (2C), 124.2, 122.8, 116.9, 114.9, 100.9, 100.3, 70.2, 46.8, 43.5, 33.4, 32.2, 28.5, 24.5; IR  $\nu_{\text{max}}$  (KBr) 3448, 1714, 1634, 1611, 1491, 1327, 1083, 760  $\text{cm}^{-1}$ ; HRMS (EI)  $m/z$  [ $\text{M}^+$ ] calcd for  $\text{C}_{23}\text{H}_{21}\text{Br}_2\text{ClO}_4$ , 553.9495; found, 553.9492.

**5m**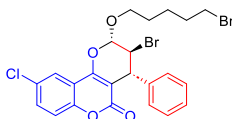

White solid; 56 mg; yield 73%;  $R_f$  = 0.58 (20% EtOAc/hexanes); mp 120–122 °C;  $^1\text{H NMR}$  ( $\text{CDCl}_3$ , 400 MHz)  $\delta$  7.88 (d,  $J$  = 2.8 Hz, 1H), 7.55 (dd,  $J$  = 8.8, 2.4 Hz, 1H), 7.34 (d,  $J$  = 8.8 Hz, 1H), 7.29–7.18 (m, 5H), 5.53 (d,  $J$  = 2.0 Hz, 1H), 4.58 (t,  $J$  = 2.4 Hz, 1H), 4.51 (s, 1H), 3.89–3.81 (m, 1H), 3.55–3.47 (m, 1H), 3.29–3.19 (m, 2H), 1.70–1.61 (m, 2H), 1.40–1.29 (m, 2H), 1.23–1.03 (m, 2H);  $^{13}\text{C NMR}$  (100 MHz,  $\text{CDCl}_3$ )  $\delta$  160.9, 156.2, 151.3, 139.3, 132.2, 129.7, 128.2 (2C), 127.9 (2C), 127.1, 122.3, 118.3,

116.2, 101.7, 101.2, 70.1, 47.0, 44.1, 33.4, 32.2, 28.4, 24.4; IR  $\nu_{max}$  (KBr) 2938, 1721, 1636, 1574, 1483, 1422, 1097, 1071, 952, 755  $\text{cm}^{-1}$ ; HRMS (EI)  $m/z$  [ $M^+$ ] calcd for  $C_{23}H_{21}Br_2ClO_4$ , 553.9495; found, 553.9498.

**5n**

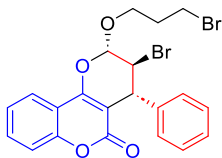

White solid; 26 mg; yield 38%;  $R_f$  = 0.56 (20% EtOAc/hexanes); mp 204–206 °C;  $^1\text{H}$  NMR ( $\text{CDCl}_3$ , 400 MHz)  $\delta$  7.94 (dd,  $J$  = 8.0, 1.2 Hz, 1H), 7.61 (td,  $J$  = 8.4, 1.2 Hz, 1H), 7.40 (d,  $J$  = 8.8 Hz, 1H), 7.36 (t,  $J$  = 7.2, 0.8 Hz, 1H), 7.30–7.20 (m, 5H), 5.55 (d,  $J$  = 2.4 Hz, 1H), 4.60 (t,  $J$  = 2.4 Hz, 1H), 4.53 (d,  $J$  = 2.4 Hz, 1H), 4.02–3.96 (m, 1H), 3.68–3.62 (m, 1H), 3.05–2.98 (m, 1H), 2.95–2.88 (m, 1H), 1.82 (quintet,  $J$  = 6.0 Hz, 2H);  $^{13}\text{C}$  NMR (100 MHz,  $\text{CDCl}_3$ )  $\delta$  161.5, 157.3, 153.0, 139.7, 132.3, 128.3 (2C), 127.8 (2C), 127.2, 124.2, 122.8, 116.9, 115.0, 101.0, 100.7, 67.3, 47.2, 43.9, 31.9, 29.7; IR  $\nu_{max}$  (KBr) 3445, 1718, 1634, 1399, 1089, 1041, 758, 699  $\text{cm}^{-1}$ ; HRMS (EI)  $m/z$  [ $M^+$ ] calcd for  $C_{21}H_{18}Br_2O_4$ , 491.9572; found, 491.9581.

**5o**

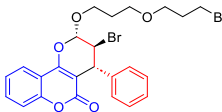

White viscous liquid; 28 mg; yield 37%;  $R_f$  = 0.53 (20% EtOAc/hexanes);  $^1\text{H}$  NMR ( $\text{CDCl}_3$ , 400 MHz)  $\delta$  7.60 (t,  $J$  = 8.4, 1.2 Hz, 1H), 7.39 (d,  $J$  = 7.6 Hz, 1H), 7.36 (t,  $J$  = 7.6 Hz, 2H), 7.29–7.18 (m, 5H), 5.53 (d,  $J$  = 2.4 Hz, 1H), 4.58 (t,  $J$  = 2.4 Hz, 1H), 4.52 (d,  $J$  = 2.4 Hz, 1H), 3.95–3.89 (m, 1H), 3.64–3.56 (m, 1H), 3.40 (t,  $J$  = 6.4 Hz, 2H), 3.35 (t,  $J$  = 6.4 Hz, 2H), 3.18–3.01 (m, 2H), 1.97 (quintet,  $J$  = 6.0 Hz, 2H), 1.64–1.51 (m, 2H);  $^{13}\text{C}$  NMR (100 MHz,  $\text{CDCl}_3$ )  $\delta$  161.5, 157.3, 152.9, 139.7, 132.2, 128.2 (2C), 127.9 (2C), 127.0, 124.1, 122.8, 116.8, 115.0, 101.0, 100.8, 67.9, 67.0, 66.6, 47.4, 44.1, 32.5, 30.5, 29.4; IR  $\nu_{max}$  (KBr) 2923, 1719, 1639, 1611, 1493, 1399, 1127, 1090, 955, 759  $\text{cm}^{-1}$ ; HRMS (EI)  $m/z$  [ $M^+$ ] calcd for  $C_{24}H_{24}Br_2O_5$ , 549.9990; found, 549.9995.

**5p**

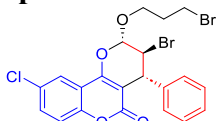

White solid; 32 mg; yield 44%;  $R_f$  = 0.57 (20% EtOAc/hexanes); mp 208–210 °C;  $^1\text{H}$  NMR ( $\text{CDCl}_3$ , 400 MHz)  $\delta$  7.91 (d,  $J$  = 2.4 Hz, 1H), 7.55 (dd,  $J$  = 8.8, 2.4 Hz, 1H), 7.34 (d,  $J$  = 9.2 Hz, 1H), 7.30–7.17 (m, 5H), 5.55 (d,  $J$  = 1.6 Hz, 1H), 4.60 (t,  $J$  = 2.0 Hz, 1H), 4.52 (s, 1H), 4.02–4.00 (m, 1H),

3.68–3.61 (m, 1H), 3.02–2.95 (m, 1H), 2.93–2.86 (m, 1H), 1.85–1.78 (m, 2H);  $^{13}\text{C}$  NMR (100 MHz,  $\text{CDCl}_3$ )  $\delta$  160.9, 156.2, 151.3, 139.2, 132.3, 129.7, 128.3 (2C), 127.7 (2C), 127.2, 122.4, 118.3, 116.3, 101.5, 101.0, 67.4, 46.7, 43.8, 31.8, 29.6; IR  $\nu_{\text{max}}$  (KBr) 2920, 1720, 1636, 1483, 1096, 1071, 954,  $756\text{ cm}^{-1}$ ; HRMS (EI)  $m/z$  [ $\text{M}^+$ ] calcd for  $\text{C}_{21}\text{H}_{17}\text{Br}_2\text{ClO}_4$ , 525.9182; found, 525.9190.

**5q**

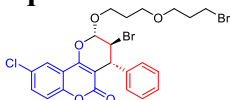

White viscous liquid; 27 mg; yield 33%;  $R_f = 0.54$  (20% EtOAc/hexanes);  $^1\text{H}$  NMR ( $\text{CDCl}_3$ , 400 MHz)  $\delta$  7.89 (d,  $J = 2.4$  Hz, 1H), 7.55 (dd,  $J = 8.8$ , 2.4 Hz, 1H), 7.33 (d,  $J = 8.8$  Hz, 1H), 7.29–7.18 (m, 5H), 5.54 (d,  $J = 2.4$  Hz, 1H), 4.58 (t,  $J = 2.4$  Hz, 1H), 4.51 (d,  $J = 1.6$  Hz, 1H), 3.98–3.88 (m, 1H), 3.65–3.56 (m, 1H), 3.42 (t,  $J = 6.4$  Hz, 2H), 3.36 (t,  $J = 6.4$  Hz, 2H), 3.17–3.09 (m, 1H), 3.08–3.00 (m, 1H), 1.99 (quintet,  $J = 6.0$  Hz, 2H), 1.62–1.56 (m, 2H);  $^{13}\text{C}$  NMR (100 MHz,  $\text{CDCl}_3$ )  $\delta$  160.9, 156.3, 151.3, 139.3, 132.2, 129.7, 128.3 (2C), 127.9 (2C), 127.2, 122.4, 118.3, 116.2, 101.6, 101.2, 67.9, 67.2, 66.5, 47.0, 44.1, 32.5, 30.6, 29.4; IR  $\nu_{\text{max}}$  (KBr) 2921, 1723, 1635, 1485, 1422, 1305, 1117, 1011, 953,  $756\text{ cm}^{-1}$ ; HRMS (EI)  $m/z$  [ $\text{M}^+$ ] calcd for  $\text{C}_{24}\text{H}_{23}\text{Br}_2\text{ClO}_5$ , 583.9601; found, 583.9594.

**5r**

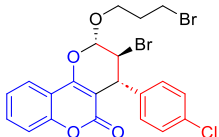

White solid; 26 mg; yield 36%;  $R_f = 0.57$  (20% EtOAc/hexanes); mp 168–170  $^{\circ}\text{C}$ ;  $^1\text{H}$  NMR ( $\text{CDCl}_3$ , 400 MHz)  $\delta$  7.94 (d,  $J = 8.0$  Hz, 1H), 7.62 (t,  $J = 7.6$  Hz, 1H), 7.40 (d,  $J = 8.4$  Hz, 1H), 7.37 (t,  $J = 7.6$  Hz, 1H), 7.25 (d,  $J = 8.4$  Hz, 2H), 7.17 (d,  $J = 8.4$  Hz, 2H), 5.55 (d,  $J = 2.4$  Hz, 1H), 4.52 (d,  $J = 2.4$  Hz, 1H), 4.48 (s, 1H), 4.06–3.94 (m, 1H), 3.75–3.64 (m, 1H), 3.14–3.05 (m, 1H), 3.04–2.95 (m, 1H), 1.86 (quintet,  $J = 6.0$  Hz, 2H);  $^{13}\text{C}$  NMR (100 MHz,  $\text{CDCl}_3$ )  $\delta$  161.4, 157.4, 152.9, 138.2, 132.9, 132.5, 129.2 (2C), 128.4 (2C), 124.3, 122.8, 116.9, 114.8, 100.9, 100.2, 67.5, 46.6, 43.4, 31.8, 29.5; IR  $\nu_{\text{max}}$  (KBr) 2921, 1714, 1636, 1610, 1491, 1412, 1126, 1091, 1075, 921,  $759\text{ cm}^{-1}$ ; HRMS (EI)  $m/z$  [ $\text{M}^+$ ] calcd for  $\text{C}_{21}\text{H}_{17}\text{Br}_2\text{ClO}_4$ , 525.9182; found, 525.9193.

**5s**

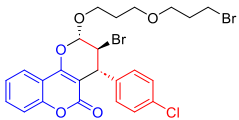

White viscous liquid; 27 mg; yield 34%;  $R_f = 0.54$  (20% EtOAc/hexanes);  $^1\text{H NMR}$  ( $\text{CDCl}_3$ , 400 MHz)  $\delta$  7.93 (d,  $J = 7.6$  Hz, 1H), 7.61 (td,  $J = 8.0$ , 0.8 Hz, 1H), 7.40 (d,  $J = 7.6$  Hz, 1H), 7.37 (t,  $J = 7.2$  Hz, 1H), 7.26–7.21 (m, 2H), 7.20–7.15 (m, 2H), 5.54 (d,  $J = 2.4$  Hz, 1H), 4.51 (t,  $J = 2.4$  Hz, 1H), 4.47 (s, 1H), 3.97–3.86 (m, 1H), 3.68–3.56 (m, 1H), 3.44–3.34 (m, 4H), 3.20–3.12 (m, 1H), 3.12–3.03 (m, 1H), 1.99 (quintet,  $J = 6.4$  Hz, 2H), 1.67–1.53 (m, 2H);  $^{13}\text{C NMR}$  (100 MHz,  $\text{CDCl}_3$ )  $\delta$  161.4, 157.5, 153.0, 138.3, 132.8, 132.4, 129.4 (2C), 128.4 (2C), 124.2, 122.8, 116.9, 114.9, 100.9, 100.3, 68.0, 67.2, 66.6, 46.8, 43.6, 32.6, 30.5, 29.5; IR  $\nu_{\text{max}}$  (KBr) 2870, 1719, 1634, 1491, 1122, 1074, 955, 760  $\text{cm}^{-1}$ ; HRMS (EI)  $m/z$  [ $\text{M}^+$ ] calcd for  $\text{C}_{24}\text{H}_{23}\text{Br}_2\text{ClO}_5$ , 583.9601; found, 583.9597.

## References

1. Y. Chen, Y. Wang, R. Zhong and J. Li, *J. Org. Chem.* 2020, **85**, 10638–10647.
2. D. Cheng, L. Wu, H. Lv, X. Xu and J. Yan, *J. Org. Chem.*, 2017, **82**, 1610–1617.

7.836  
7.819  
7.816  
7.558  
7.554  
7.536  
7.518  
7.515  
7.394  
7.376  
7.336  
7.317  
7.310  
7.298  
7.289  
7.260  
7.242  
7.224  
6.795  
6.780  
5.367  
5.356  
5.353  
5.341  
4.545  
4.534

DYY-JNS-093

NAME DYY-JNS-093  
EXPNO 1  
PROCNO 1  
Date\_ 20231226  
Time 13.06  
INSIRUM spect  
PROBHD 5 mm PABBO BB/  
PULPROG zg30  
TD 65536  
SOLVENT CDCl3  
NS 16  
DS 0  
SWH 8012.820 Hz  
FIDRES 0.122266 Hz  
AQ 4.0894966 sec  
RG 205.92  
DW 62.400 usec  
DE 16.53 usec  
TE 294.2 K  
D1 2.0000000 sec  
TDO 1

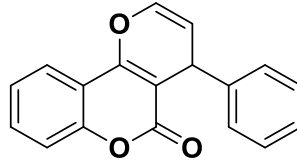

2a

==== CHANNEL f1 =====  
SFO1 400.1324008 MHz  
NUC1 1H  
P1 14.00 usec  
SI 16384  
SF 400.1300098 MHz  
WDW EM  
SSB 0  
LB 0.00 Hz  
GB 0  
PC 1.00

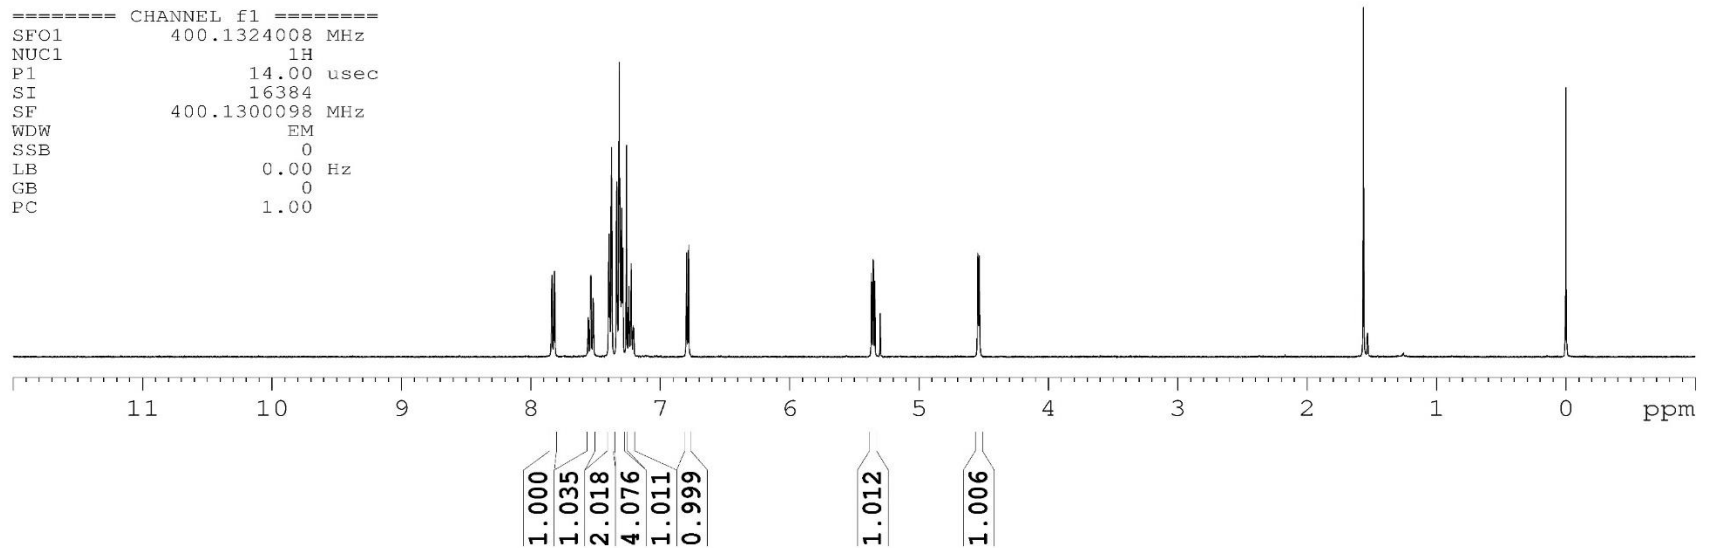



DYY-VS-2-175C

```
NAME      DYY-VS-2-175C
EXPNO     1
PROCNO    1
Date_     20240409
Time      11.27
INSTRUM   spect
PROBHD    5 mm PABBO BB/
PULPROG   zgpgq30
TD         65536
SOLVENT   CDC13
NS         1000
DS         0
SWH        24038.461 Hz
FIDRES     0.366798 Hz
AQ         1.3631988 sec
RG         205.92
DW         20.800 usec
DE         6.50 usec
TE         297.7 K
D1         2.00000000 sec
D11        0.03000000 sec
TD0        1
```

161.403  
155.598  
152.526  
143.504  
138.024  
131.862  
128.484  
128.326  
127.100  
124.020  
122.668  
116.625  
114.274  
108.846  
103.665  
77.318  
77.000  
76.682  
35.251

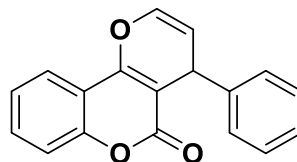

2a

```
===== CHANNEL f1 =====
SFO1      100.6233329 MHz
NUC1       13C
P1         10.00 usec
SI         32768
SF         100.6127685 MHz
WDW        EM
SSB        0
LB         2.00 Hz
GB         0
PC         1.00
```

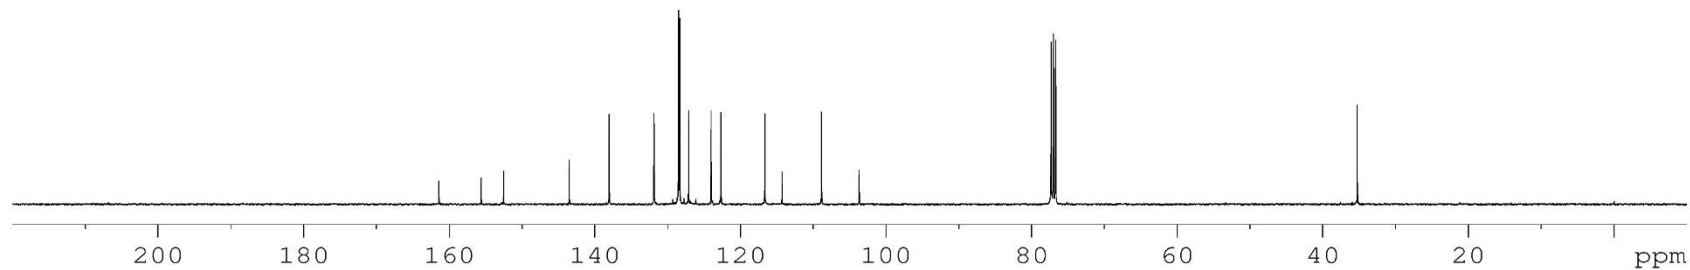

7.717  
7.695  
7.384  
7.366  
7.330  
7.312  
7.293  
7.260  
7.236  
7.232  
7.222  
7.217  
7.199  
6.893  
6.887  
6.871  
6.865  
6.780  
6.774  
6.761  
6.759  
6.746  
6.744  
5.344  
5.332  
5.329  
5.318  
4.501  
4.490  
3.856

DYY-VS-2-207

NAME DYY-VS-2-207  
EXPNO 1  
PROCNO 1  
Date\_ 20240503  
Time 10.35  
INSTRUM spect  
PROBHD 5 mm PABBO BB/  
PULPROG zg30  
TD 65536  
SOLVENT CDC13  
NS 16  
DS 0  
SWH 8012.820 Hz  
FIDRES 0.122266 Hz  
AQ 4.0894966 sec  
RG 205.92  
DW 62.400 usec  
DE 16.53 usec  
TE 292.5 K  
D1 2.00000000 sec  
TDO 1

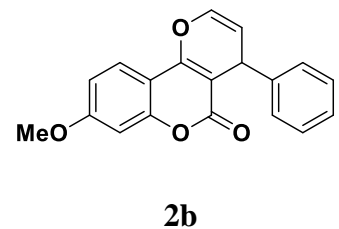

==== CHANNEL f1 =====  
SFO1 400.1324008 MHz  
NUC1 1H  
P1 14.00 usec  
SI 16384  
SF 400.1300100 MHz  
WDW EM  
SSB 0  
LB 0.00 Hz  
GB 0  
PC 1.00

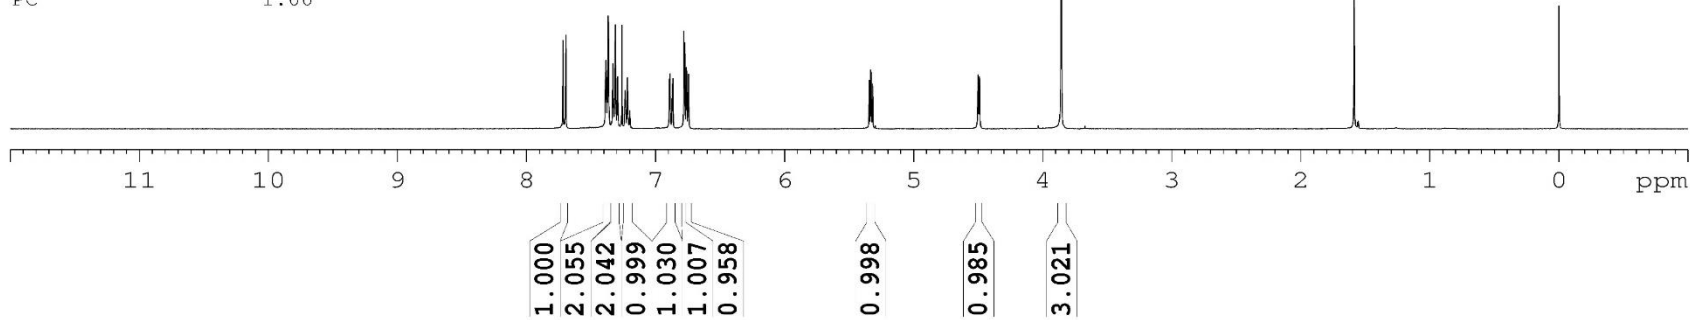

DYY-VS-2-207C

NAME DYY-VS-2-207C  
EXPNO 1  
PROCNO 1  
Date\_ 20240507  
Time 11.15  
INSTRUM spect  
PROBHD 5 mm PABBO BB/  
PULPROG zgpg30  
TD 65536  
SOLVENT CDC13  
NS 900  
DS 0  
SWH 24038.461 Hz  
FIDRES 0.366798 Hz  
AQ 1.3631988 sec  
RG 205.92  
DW 20.800 usec  
DE 6.50 usec  
TE 297.6 K  
D1 2.00000000 sec  
D11 0.03000000 sec  
TD0 1

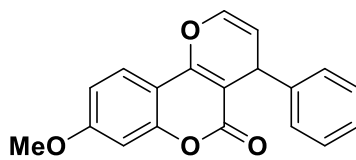

2b

===== CHANNEL f1 =====  
SFO1 100.6233329 MHz  
NUC1 13C  
P1 10.00 usec  
SI 32768  
SF 100.6127776 MHz  
WDW EM  
SSB 0  
LB 2.00 Hz  
GB 0  
PC 1.00

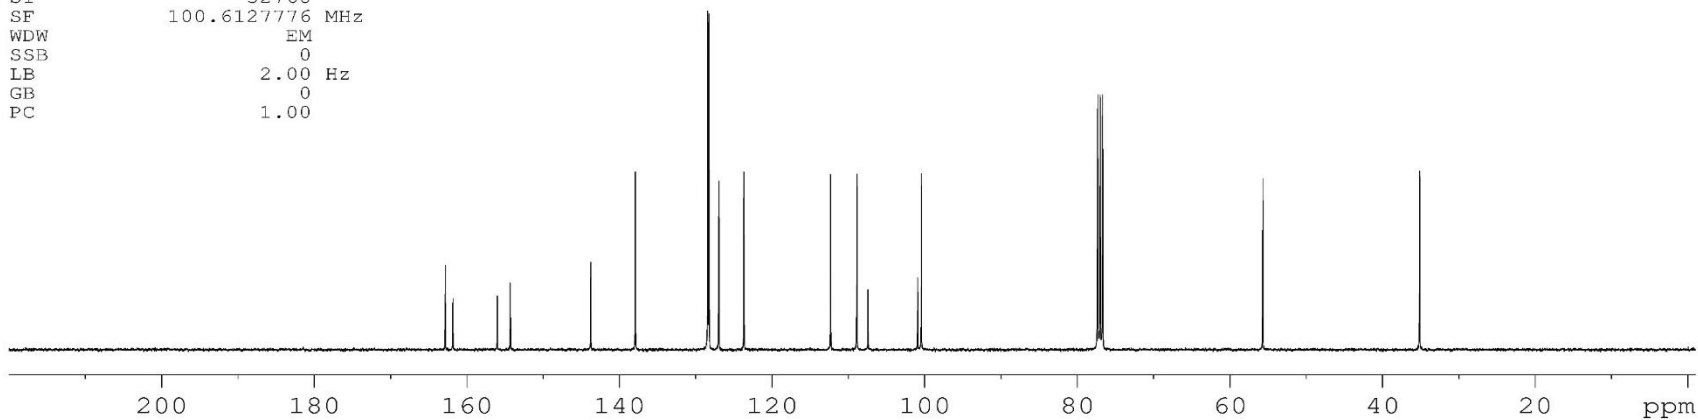

7.803  
7.797  
7.489  
7.482  
7.466  
7.460  
7.380  
7.362  
7.340  
7.321  
7.302  
7.260  
7.246  
7.233  
7.223  
6.793  
6.778  
5.373  
5.361  
5.358  
5.346  
4.532  
4.520

DYY-VS-2-224

NAME DYY-VS-2-224  
EXPNO 1  
PROCNO 1  
Date\_ 20240521  
Time 10.19  
INSTRUM spect  
PROBHD 5 mm PABBO BB/  
PULPROG zg30  
TD 65536  
SOLVENT CDCl3  
NS 16  
DS 0  
SWH 8012.820 Hz  
FIDRES 0.122266 Hz  
AQ 4.0894966 sec  
RG 205.92  
DW 62.400 usec  
DE 16.53 usec  
TE 294.8 K  
D1 2.00000000 sec  
TD0 1

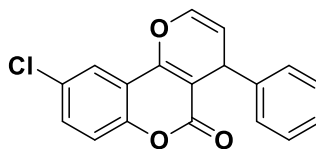

2c

==== CHANNEL f1 =====  
SFO1 400.1324008 MHz  
NUC1 1H  
P1 14.00 usec  
SI 16384  
SF 400.1300098 MHz  
WDW EM  
SSB 0  
LB 0.00 Hz  
GB 0  
PC 1.00

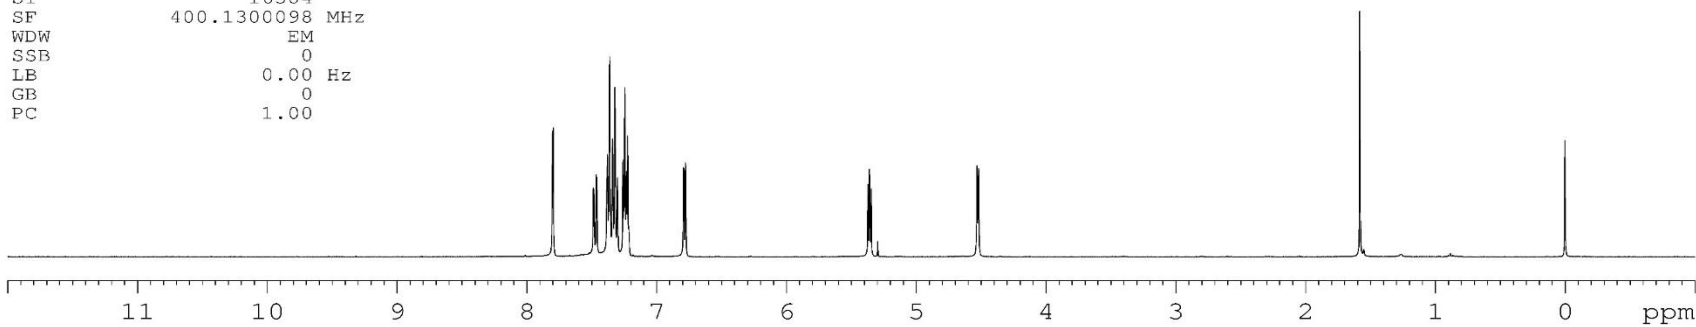

1.000  
1.137  
2.231  
2.188  
2.343  
1.032

1.077

1.051

DYY-VS-2-224C

NAME DYY-VS-2-224C  
EXPNO 1  
PROCNO 1  
Date\_ 20240521  
Time 11.06  
INSTRUM spect  
PROBHD 5 mm PABBO BB/  
PULPROG zgpg30  
TD 65536  
SOLVENT CDCl3  
NS 600  
DS 0  
SWH 24038.461 Hz  
FIDRES 0.366798 Hz  
AQ 1.3631988 sec  
RG 205.92  
DW 20.800 usec  
DE 6.50 usec  
TE 297.0 K  
D1 2.00000000 sec  
D11 0.03000000 sec  
TD0 1

160.807  
154.533  
150.853  
143.108  
137.986  
131.866  
129.610  
128.539  
128.360  
127.251  
122.313  
118.099  
115.394  
108.845  
104.526

77.318  
77.000  
76.682

35.236

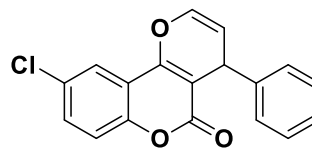

2c

==== CHANNEL f1 =====  
SFO1 100.6233329 MHz  
NUC1 13C  
P1 10.00 usec  
SI 32768  
SF 100.6127763 MHz  
WDW EM  
SSB 0  
LB 2.00 Hz  
GB 0  
PC 1.00

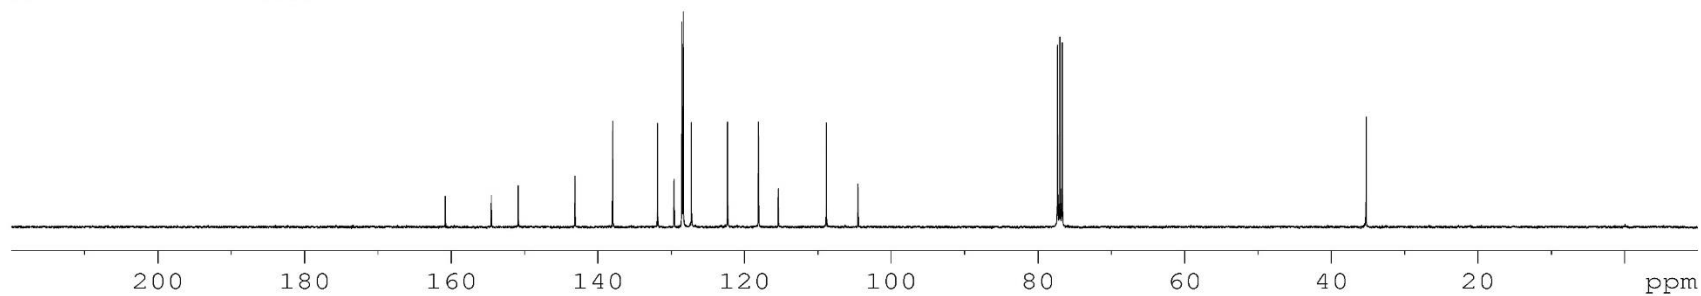

DYY-VS-2-220

NAME DYY-VS-2-220  
EXPNO 1  
PROCNO 1  
Date\_ 20240514  
Time 10.26  
INSTRUM spect  
PROBHD 5 mm PABBO BB/  
PULPROG zg30  
TD 65536  
SOLVENT CDCl3  
NS 16  
DS 0  
SWH 8012.820 Hz  
FIDRES 0.122266 Hz  
AQ 4.0894966 sec  
RG 205.92  
DW 62.400 usec  
DE 16.53 usec  
TE 296.1 K  
D1 2.00000000 sec  
TDO 1

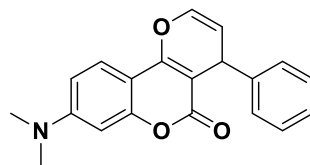

2d

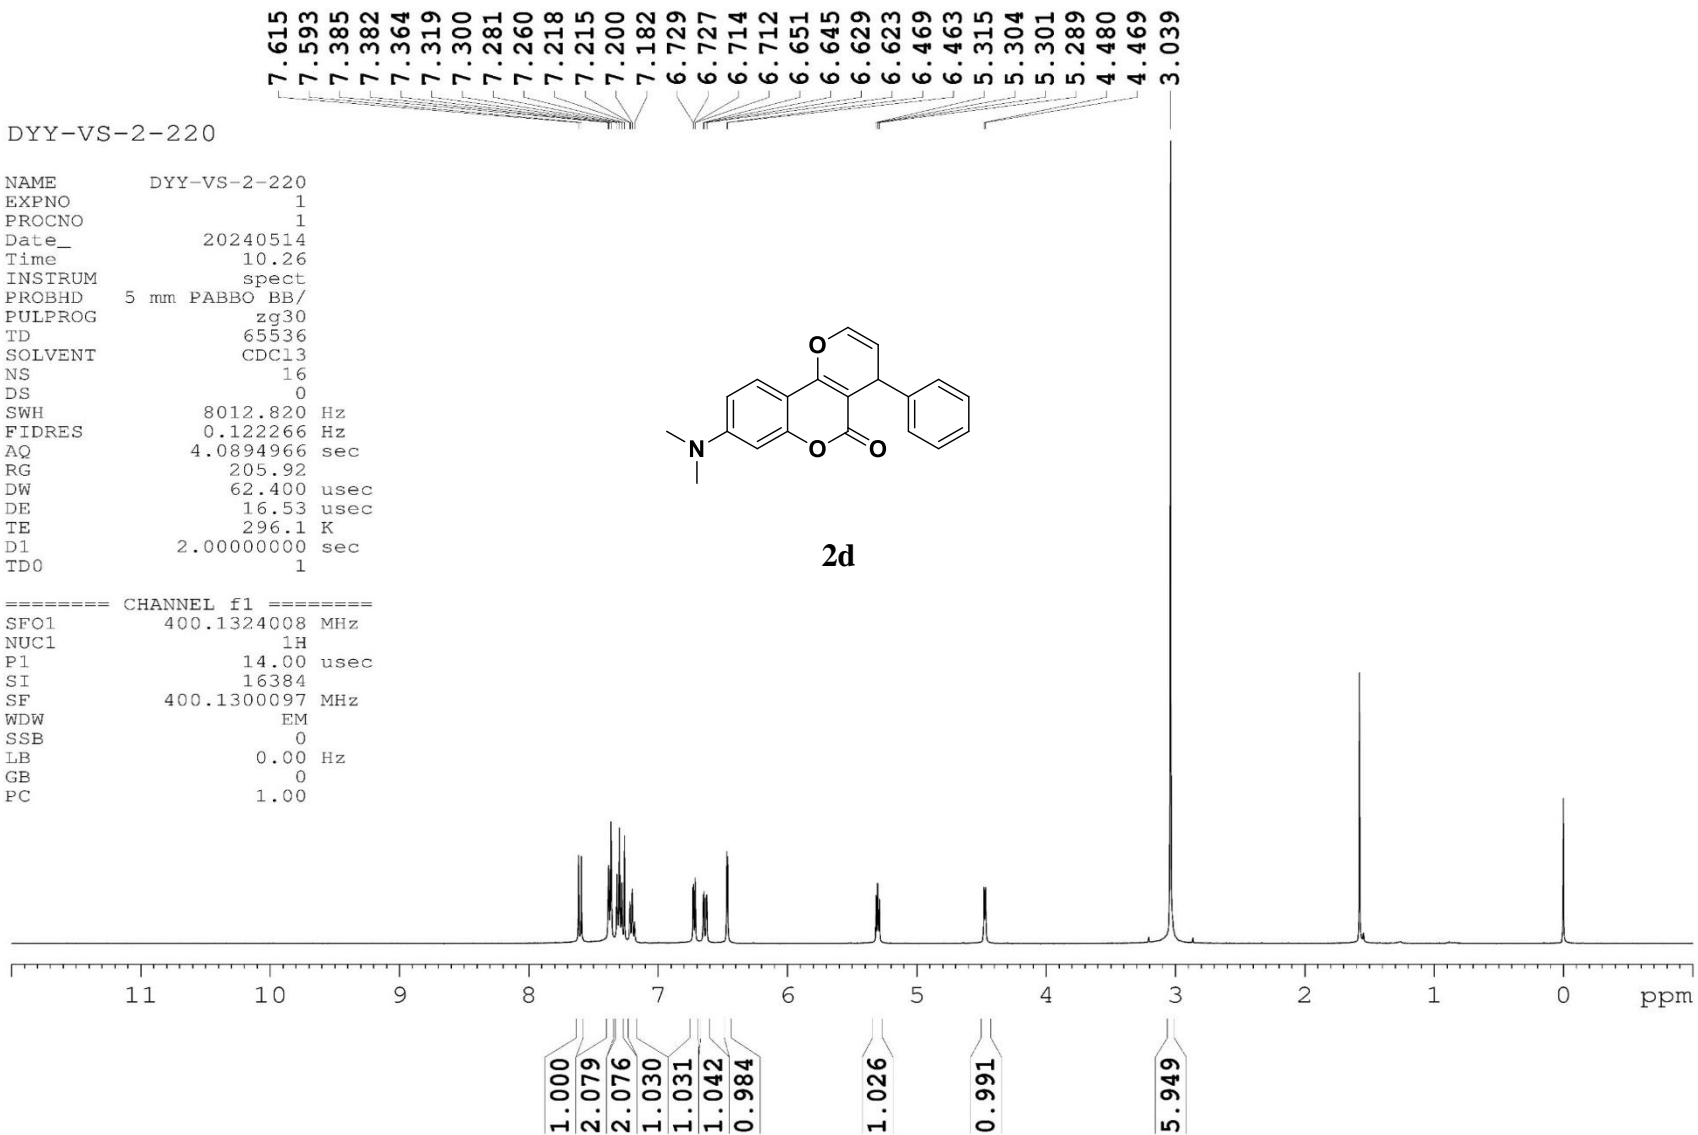

DYY-VS-2-220C

NAME DYY-VS-2-220C  
EXPNO 1  
PROCNO 1  
Date\_ 20240517  
Time 12.15  
INSTRUM spect  
PROBHD 5 mm PABBO BB/  
PULPROG zgpg30  
TD 65536  
SOLVENT CDCl3  
NS 467  
DS 0  
SWH 24038.461 Hz  
FIDRES 0.366798 Hz  
AQ 1.3631988 sec  
RG 205.92  
DW 20.800 usec  
DE 6.50 usec  
TE 297.6 K  
D1 2.00000000 sec  
D11 0.03000000 sec  
TDO 1

162.439  
156.635  
154.645  
152.923  
144.281  
137.862  
128.345  
128.193  
126.759  
123.292  
108.856  
108.779  
102.941  
98.633  
97.741  
77.318  
77.000  
76.682  
40.056  
35.144

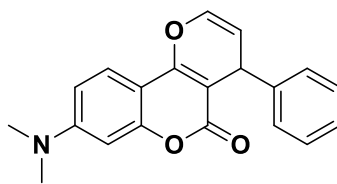

2d

==== CHANNEL f1 =====  
SFO1 100.6233329 MHz  
NUC1 13C  
P1 10.00 usec  
SI 32768  
SF 100.6127778 MHz  
WDW EM  
SSB 0  
LB 2.00 Hz  
GB 0  
PC 1.00

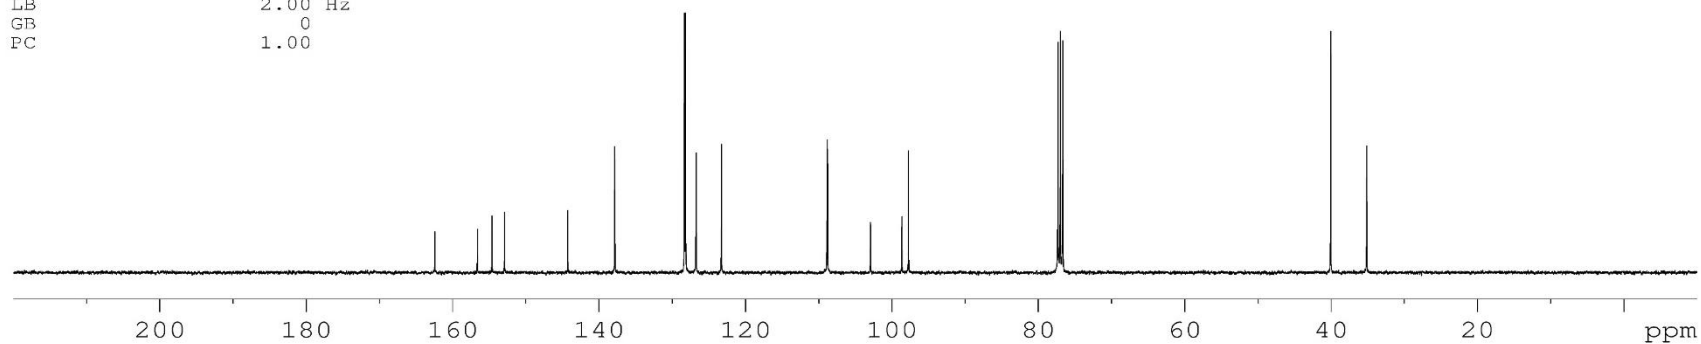

7.833  
7.830  
7.813  
7.810  
7.569  
7.565  
7.548  
7.530  
7.526  
7.340  
7.335  
7.330  
7.320  
7.314  
7.302  
7.293  
7.287  
7.282  
7.271  
7.266  
7.260  
6.808  
6.806  
6.793  
6.791  
5.328  
5.317  
5.313  
5.302  
4.524  
4.513

DYY-VS-3-252

NAME DYY-VS-3-252  
EXPNO 1  
PROCNO 1  
Date\_ 20240628  
Time 10.15  
INSTRUM spect  
PROBHD 5 mm PABBO BB/  
PULPROG zg30  
TD 65536  
SOLVENT CDC13  
NS 16  
DS 0  
SWH 8012.820 Hz  
FIDRES 0.122266 Hz  
AQ 4.0894966 sec  
RG 205.92  
DW 62.400 usec  
DE 16.53 usec  
TE 291.3 K  
D1 2.00000000 sec  
TDO 1

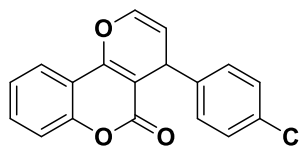

2e

===== CHANNEL f1 =====  
SFO1 400.1324008 MHz  
NUC1 1H  
P1 14.00 usec  
SI 16384  
SF 400.1300100 MHz  
WDW EM  
SSB 0  
LB 0.00 Hz  
GB 0  
PC 1.00

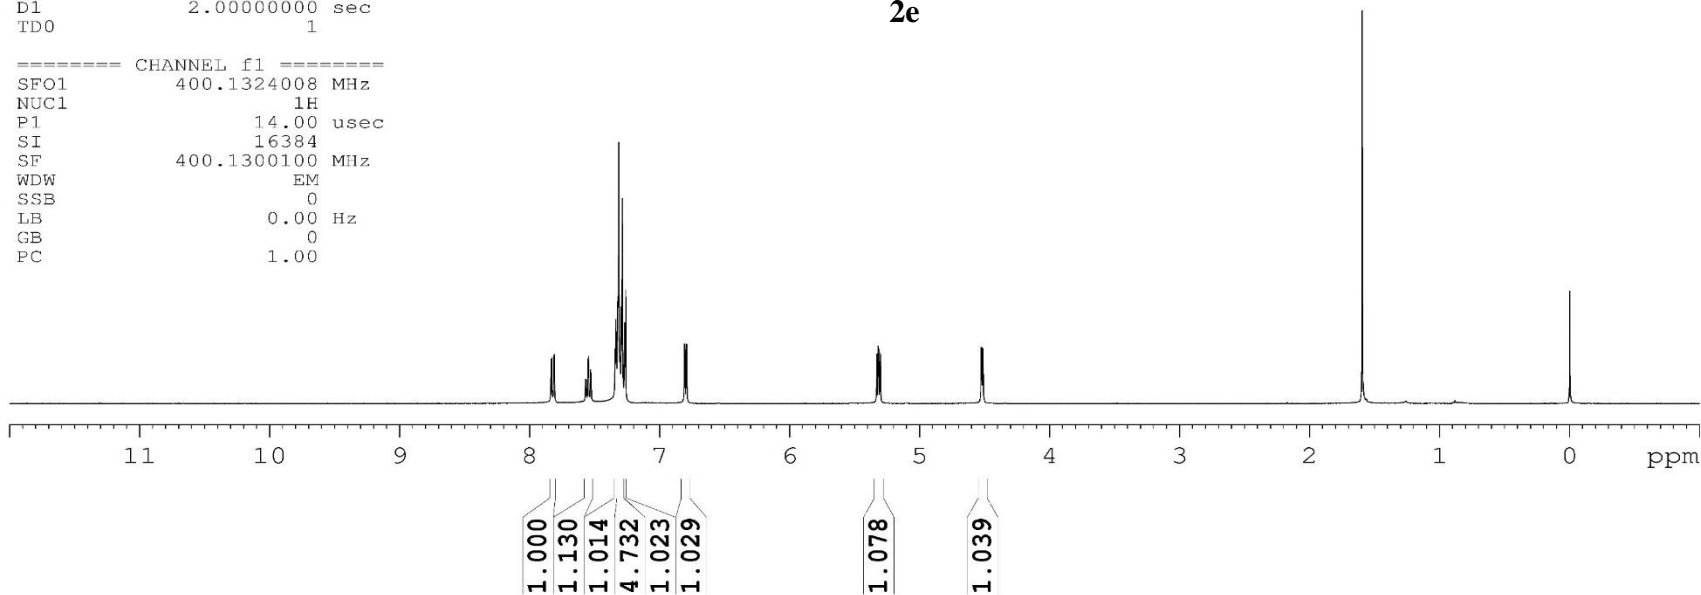



DYY-VS-3-252C

NAME DYY-VS-3-252C  
EXPNO 1  
PROCNO 1  
Date\_ 20240628  
Time 11.03  
INSTRUM spect  
PROBHD 5 mm PABBO BB/  
PULPROG zgpg30  
TD 65536  
SOLVENT CDC13  
NS 505  
DS 0  
SWH 24038.461 Hz  
FIDRES 0.366798 Hz  
AQ 1.3631988 sec  
RG 205.92  
DW 20.800 usec  
DE 6.50 usec  
TE 293.0 K  
D1 2.00000000 sec  
D11 0.03000000 sec  
TDO 1

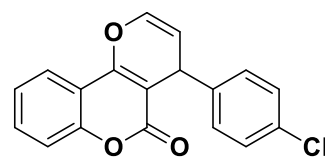

2e

==== CHANNEL f1 =====  
SFO1 100.6233329 MHz  
NUC1 13C  
P1 10.00 usec  
SI 32768  
SF 100.6127757 MHz  
WDW EM  
SSB 0  
LB 2.00 Hz  
GB 0  
PC 1.00

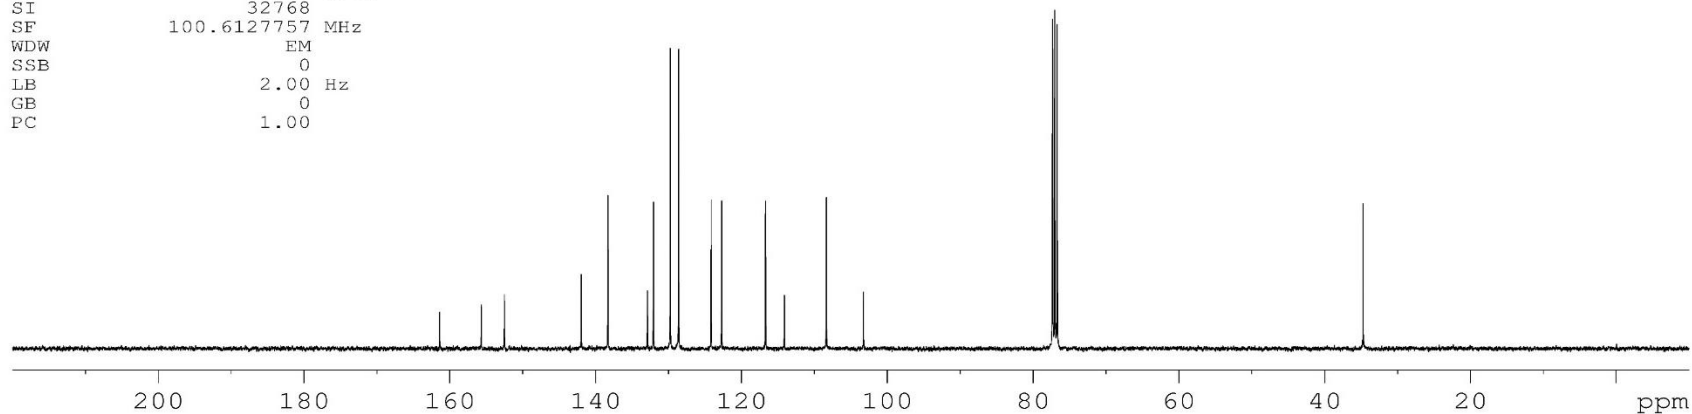

161.394  
155.692  
152.517  
141.971  
138.312  
132.905  
132.071  
129.765  
128.601  
124.145  
122.717  
116.687  
114.117  
108.351  
103.255  
77.318  
77.000  
76.683  
34.714

7.828  
7.811  
7.808  
7.551  
7.548  
7.529  
7.512  
7.509  
7.329  
7.309  
7.306  
7.290  
7.280  
7.260  
7.134  
7.114  
6.779  
6.765  
6.764  
5.349  
5.337  
5.334  
5.322  
4.503  
4.492

2.305

DYY-VS-3-262

NAME DYY-VS-3-262  
EXPNO 1  
PROCNO 1  
Date\_ 20240709  
Time 10.09  
INSTRUM spect  
PROBHD 5 mm PABBO BB/  
PULPROG zg30  
TD 65536  
SOLVENT CDCl3  
NS 16  
DS 0  
SWH 8012.820 Hz  
FIDRES 0.122266 Hz  
AQ 4.0894966 sec  
RG 205.92  
DW 62.400 usec  
DE 16.53 usec  
TE 294.4 K  
D1 2.00000000 sec  
TD0 1

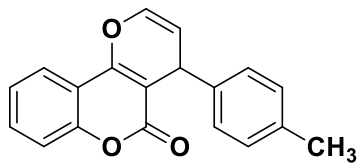

2f

==== CHANNEL f1 =====  
SFO1 400.1324008 MHz  
NUC1 1H  
P1 14.00 usec  
SI 16384  
SF 400.1300098 MHz  
WDW EM  
SSB 0  
LB 0.00 Hz  
GB 0  
PC 1.00

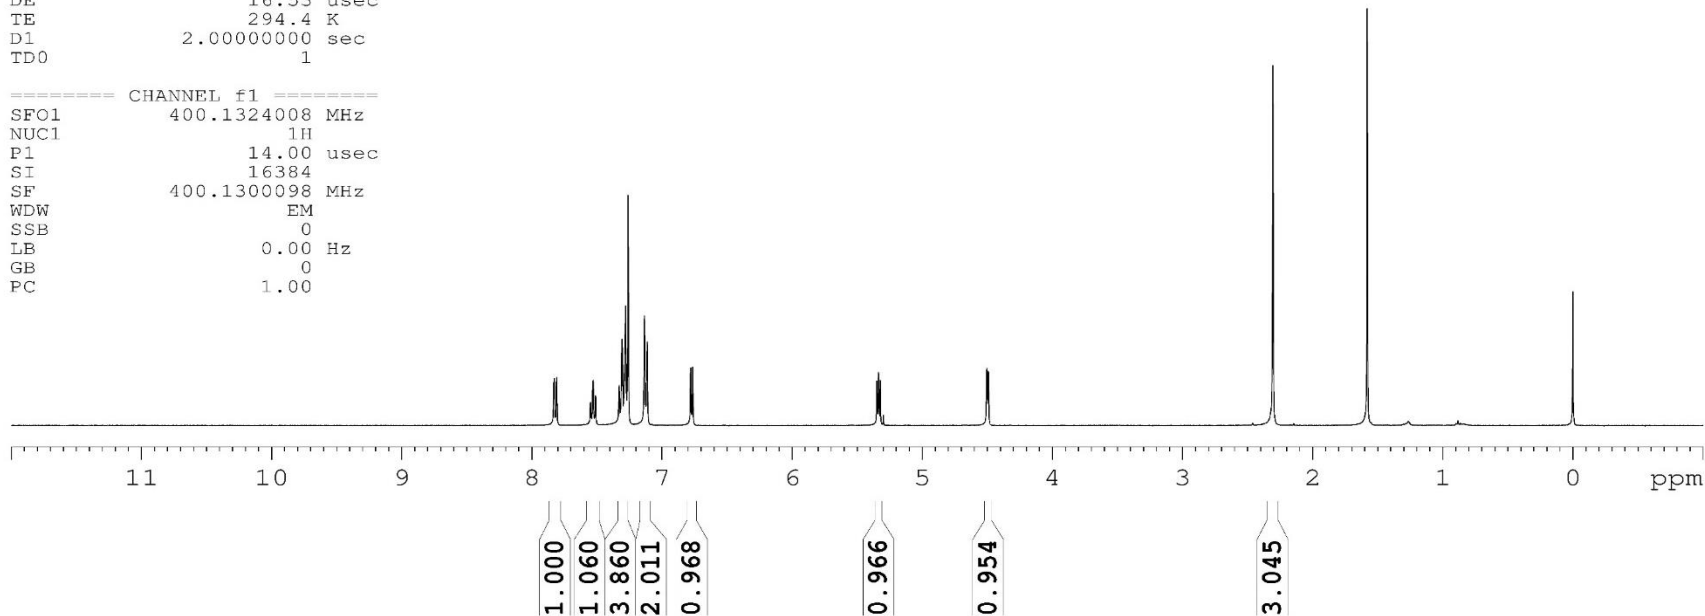

DYY-VS-3-262C

NAME DYY-VS-3-262C  
EXPNO 1  
PROCNO 1  
Date\_ 20240709  
Time 10.42  
INSTRUM spect  
PROBHD 5 mm PABBO BB/  
PULPROG zgpg30  
TD 65536  
SOLVENT CDC13  
NS 280  
DS 0  
SWH 24038.461 Hz  
FIDRES 0.366798 Hz  
AQ 1.3631988 sec  
RG 205.92  
DW 20.800 usec  
DE 6.50 usec  
TE 296.5 K  
D1 2.00000000 sec  
D11 0.03000000 sec  
TDO 1

==== CHANNEL f1 =====  
SFO1 100.6233329 MHz  
NUC1 13C  
P1 10.00 usec  
SI 32768  
SF 100.6127766 MHz  
WDW EM  
SSB 0  
LB 2.00 Hz  
GB 0  
PC 1.00

161.452  
155.504  
152.502  
140.667  
137.905  
136.752  
131.800  
129.190  
128.194  
123.990  
122.649  
116.605  
114.310  
108.970  
103.809

77.318  
77.000  
76.683

34.810

21.014

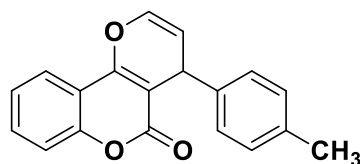

2f

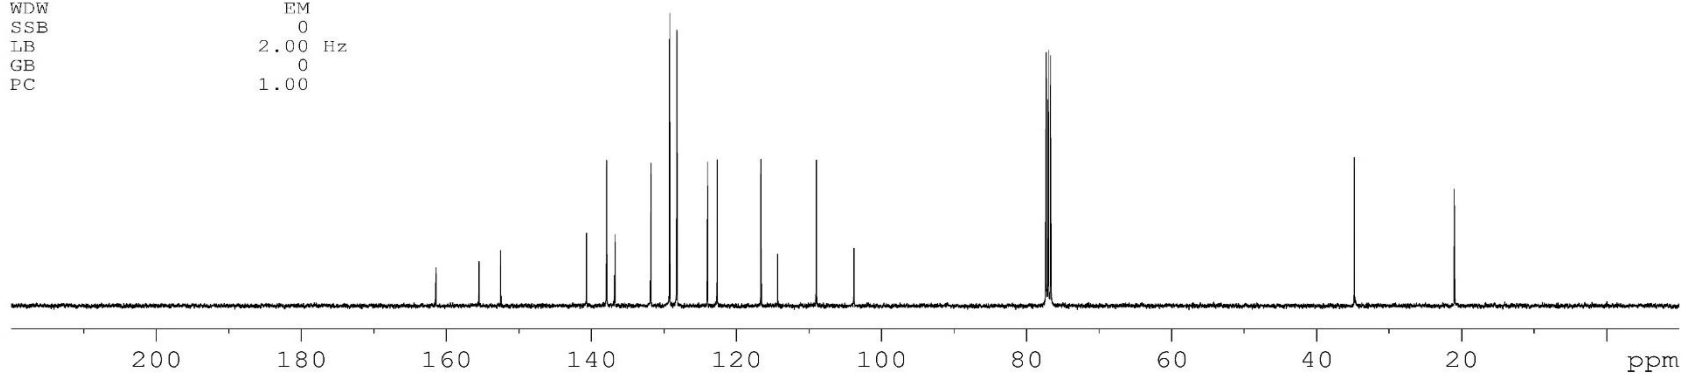

8.326  
8.305  
7.897  
7.877  
7.756  
7.736  
7.616  
7.600  
7.580  
7.564  
7.561  
7.533  
7.515  
7.497  
7.423  
7.404  
7.384  
7.363  
7.343  
7.313  
7.295  
7.260  
6.697  
6.696  
6.683  
6.681  
5.496  
5.485  
5.482  
5.471  
5.397  
5.386

1.576

DYY-VS-3-240-1

NAME DYY-VS-3-240-1  
EXPNO 1  
PROCNO 1  
Date\_ 20240625  
Time 10.17  
INSTRUM spect  
PROBHD 5 mm PABBO BB/  
PULPROG zg30  
TD 65536  
SOLVENT CDC13  
NS 16  
DS 0  
SWH 8012.820 Hz  
FIDRES 0.122266 Hz  
AQ 4.0894966 sec  
RG 205.92  
DW 62.400 usec  
DE 16.53 usec  
TE 293.5 K  
D1 2.00000000 sec  
TD0 1

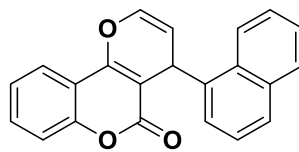

2g

==== CHANNEL f1 =====  
SFO1 400.1324008 MHz  
NUC1 1H  
P1 14.00 usec  
SI 16384  
SF 400.1300100 MHz  
WDW EM  
SSB 0  
LB 0.00 Hz  
GB 0  
PC 1.00

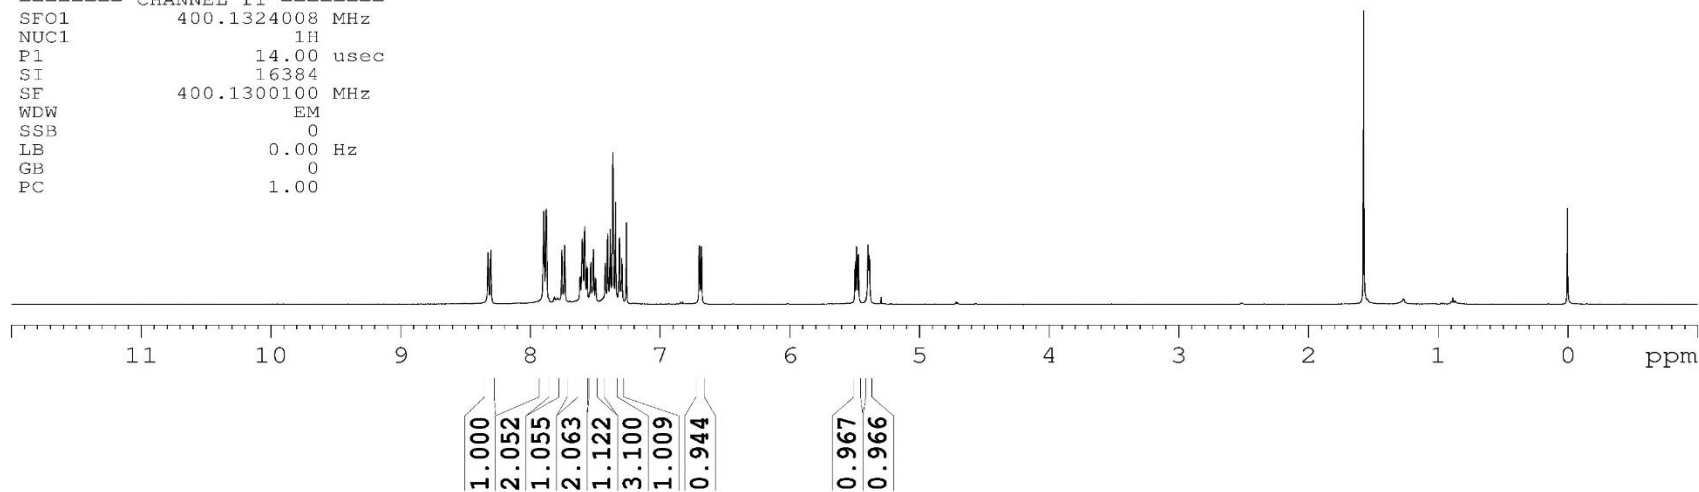

161.400  
 156.845  
 152.634  
 140.170  
 137.584  
 133.935  
 132.024  
 130.658  
 128.910  
 127.618  
 126.446  
 125.710  
 125.671  
 124.130  
 122.790  
 122.686  
 116.764  
 114.240  
 108.854  
 103.013  
 77.318  
 77.000  
 76.682

DYY-VS-3-240C

NAME DYY-VS-3-240C  
 EXPNO 1  
 PROCNO 1  
 Date\_ 20240625  
 Time 11.03  
 INSTRUM spect  
 PROBHD 5 mm PABBO BB/  
 PULPROG zgpg30  
 TD 65536  
 SOLVENT CDCl3  
 NS 395  
 DS 0  
 SWH 24038.461 Hz  
 FIDRES 0.366798 Hz  
 AQ 1.3631988 sec  
 RG 205.92  
 DW 20.800 usec  
 DE 6.50 usec  
 TE 293.8 K  
 D1 2.00000000 sec  
 D11 0.03000000 sec  
 TD0 1

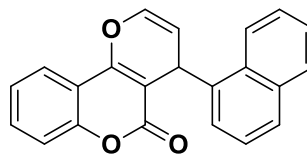

2g

==== CHANNEL f1 =====  
 SFO1 100.6233329 MHz  
 NUC1 13C  
 P1 10.00 usec  
 SI 32768  
 SF 100.6127760 MHz  
 WDW EM  
 SSB 0  
 LB 2.00 Hz  
 GB 0  
 PC 1.00

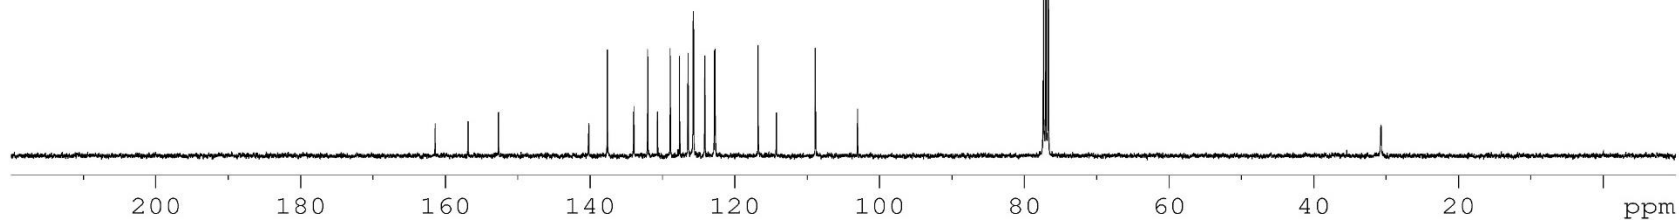

— 30.718

8.192  
8.170  
7.857  
7.855  
7.838  
7.835  
7.599  
7.596  
7.576  
7.554  
7.368  
7.348  
7.331  
7.311  
7.260  
6.862  
6.847  
5.340  
5.329  
5.325  
5.314  
4.681  
4.670

DYY-VS-2-189-0903

NAME DYY-VS-2-189-0903  
EXPNO 1  
PROCNO 1  
Date\_ 20240903  
Time 12.47  
INSTRUM spect  
PROBHD 5 mm PABBO BB/  
PULPROG zg30  
TD 65536  
SOLVENT CDCl3  
NS 16  
DS 0  
SWH 8012.820 Hz  
FIDRES 0.122266 Hz  
AQ 4.0894966 sec  
RG 205.92  
DW 62.400 usec  
DE 16.53 usec  
TE 292.5 K  
D1 2.0000000 sec  
TD0 1

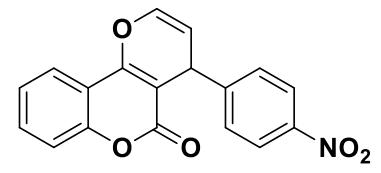

2h

===== CHANNEL f1 =====  
SF01 400.1324008 MHz  
NUC1 1H  
P1 14.00 usec  
SI 16384  
SF 400.1300101 MHz  
WDW EM  
SSB 0  
LB 0.00 Hz  
GB 0  
PC 1.00

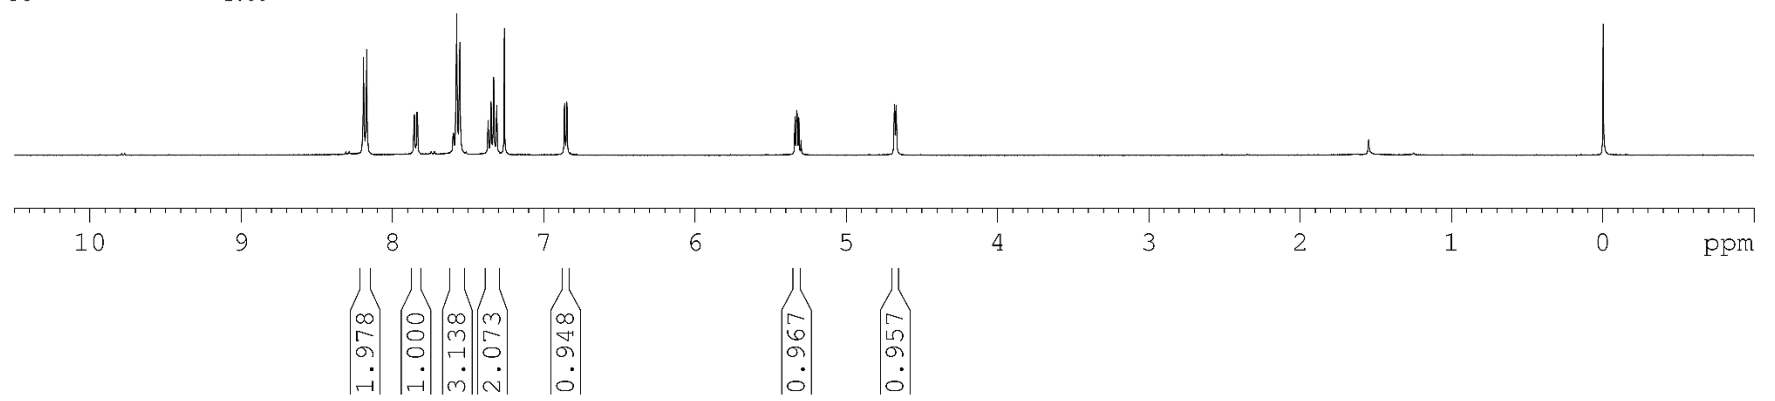

DYY-VS-2-189C

NAME DYY-VS-2-189C  
EXPNO 1  
PROCNO 1  
Date\_ 20240416  
Time 12.44  
INSTRUM spect  
PROBHD 5 mm PABBO BB/  
PULPROG zgpg30  
TD 65536  
SOLVENT CDC13  
NS 2600  
DS 0  
SWH 24038.461 Hz  
FIDRES 0.366798 Hz  
AQ 1.3631988 sec  
RG 205.92  
DW 20.800 usec  
DE 6.50 usec  
TE 297.1 K  
D1 2.00000000 sec  
D11 0.03000000 sec  
TDO 1

161.275  
156.134  
152.643  
150.481  
147.025  
138.920  
132.453  
129.364  
124.348  
123.797  
122.832  
116.813  
113.916  
107.481  
102.442

77.318  
77.000  
76.683

35.347

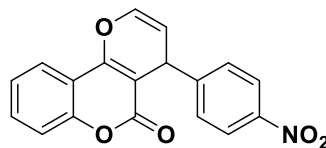

2h

===== CHANNEL f1 =====  
SFO1 100.6233329 MHz  
NUC1 13C  
P1 10.00 usec  
SI 32768  
SF 100.6127734 MHz  
WDW EM  
SSB 0  
LB 2.00 Hz  
GB 0  
PC 1.00

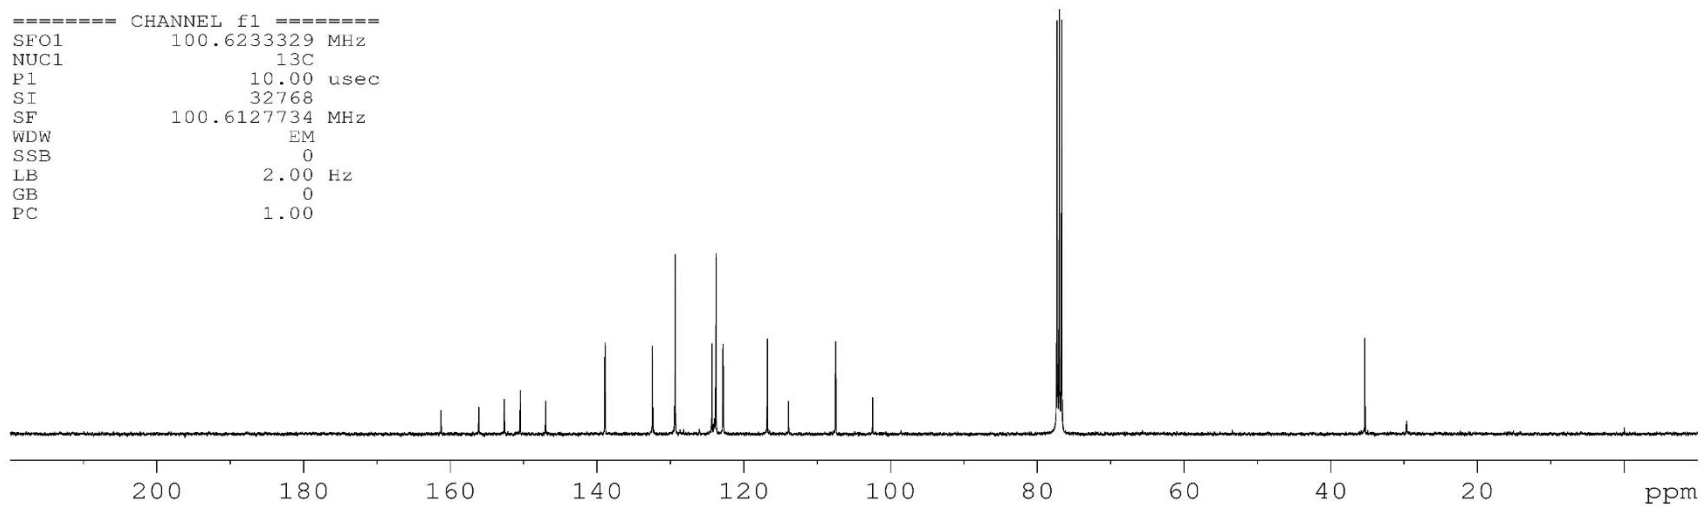

DYY-VS-3-277

NAME DYY-VS-3-277  
EXPNO 1  
PROCNO 1  
Date\_ 20240730  
Time 10.23  
INSTRUM spect  
PROBHD 5 mm PABBO BB/  
PULPROG zg30  
TD 65536  
SOLVENT CDCl3  
NS 16  
DS 0  
SWH 8012.820 Hz  
FIDRES 0.122266 Hz  
AQ 4.0894966 sec  
RG 205.92  
DW 62.400 usec  
DE 16.53 usec  
TE 291.5 K  
D1 2.0000000 sec  
TD0 1

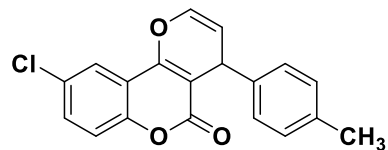

2i

==== CHANNEL f1 =====  
SFO1 400.1324008 MHz  
NUC1 1H  
P1 14.00 usec  
SI 16384  
SF 400.1300101 MHz  
WDW EM  
SSB 0  
LB 0.00 Hz  
GB 0  
PC 1.00

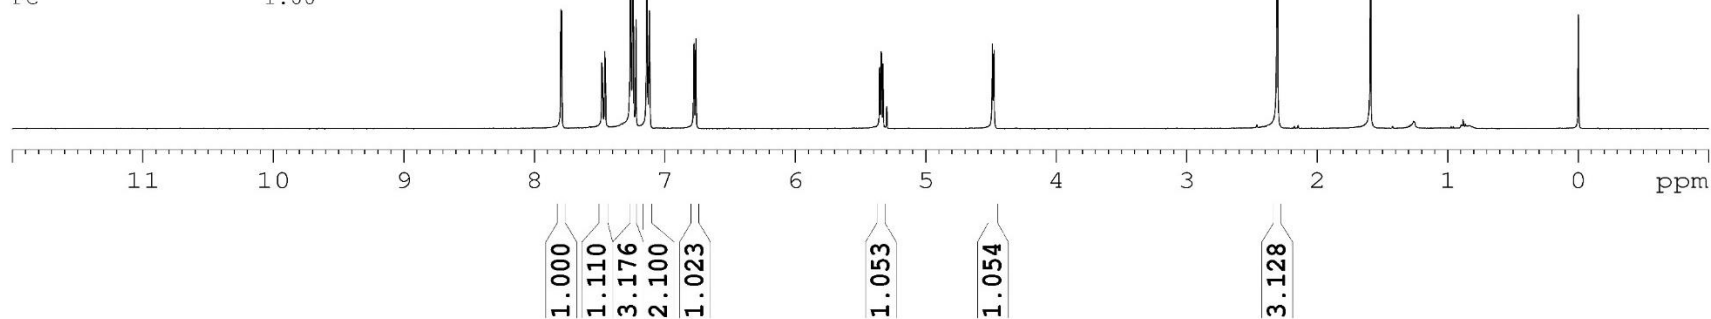

7.796  
7.790  
7.483  
7.477  
7.461  
7.455  
7.264  
7.260  
7.244  
7.221  
7.138  
7.118  
6.777  
6.761  
5.354  
5.342  
5.339  
5.327  
4.489  
4.478

2.307

1.593



160.883  
 154.446  
 150.824  
 140.266  
 137.868  
 136.952  
 131.814  
 129.576  
 129.244  
 128.232  
 122.304  
 118.087  
 115.431  
 108.965  
 104.660

77.318  
 77.000  
 76.683

34.790

21.032

DYY-VS-3-277C

NAME DYY-VS-3-277C  
 EXPNO 1  
 PROCNO 1  
 Date\_ 20240730  
 Time 10.51  
 INSTRUM spect  
 PROBHD 5 mm PABBO BB/  
 PULPROG zgpg30  
 TD 65536  
 SOLVENT CDCl3  
 NS 180  
 DS 0  
 SWH 24038.461 Hz  
 FIDRES 0.366798 Hz  
 AQ 1.3631988 sec  
 RG 205.92  
 DW 20.800 usec  
 DE 6.50 usec  
 TE 292.6 K  
 D1 2.00000000 sec  
 D11 0.03000000 sec  
 TD0 1

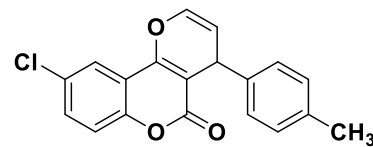

2i

==== CHANNEL f1 =====  
 SFO1 100.6233329 MHz  
 NUC1 13C  
 P1 10.00 usec  
 SI 32768  
 SF 100.6127765 MHz  
 WDW EM  
 SSB 0  
 LB 2.00 Hz  
 GB 0  
 PC 1.00

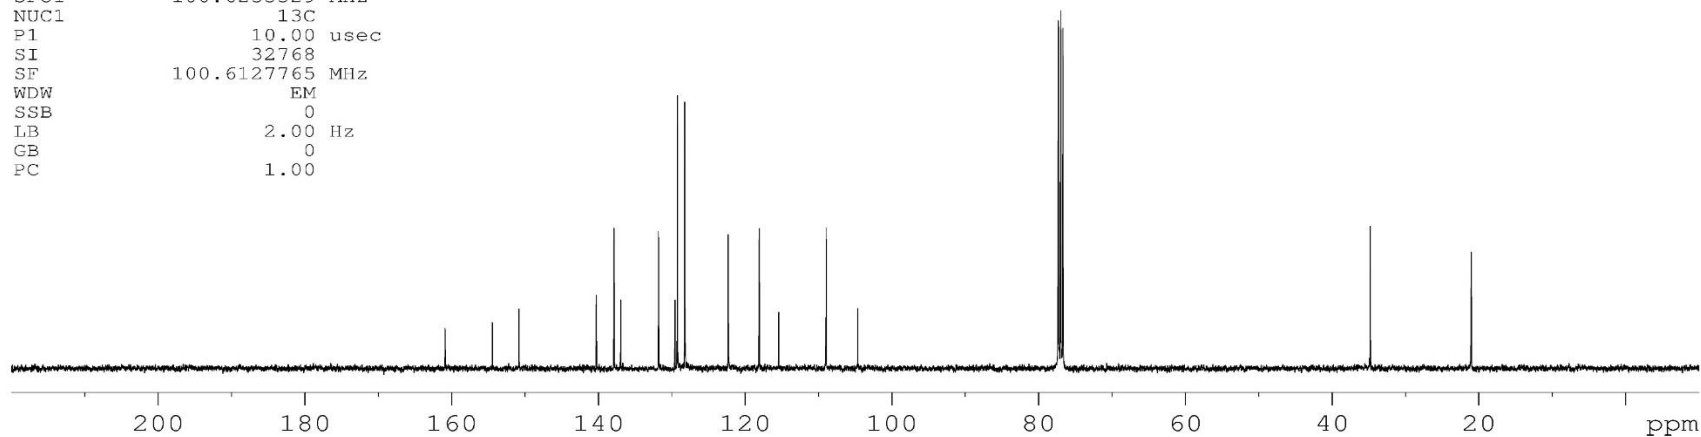

7.871  
7.869  
7.852  
7.849  
7.578  
7.574  
7.559  
7.542  
7.524  
7.521  
7.450  
7.443  
7.428  
7.410  
7.394  
7.392  
7.357  
7.350  
7.339  
7.330  
7.315  
7.294  
7.281  
7.260  
7.245  
7.243  
6.152  
6.141  
5.774  
5.763

DYY-JNS-105

NAME DYY-JNS-105  
EXPNO 1  
PROCNO 1  
Date\_ 20240112  
Time 10.29  
INSTRUM spect  
PROBHD 5 mm PABBO BB/  
PULPROG zg30  
TD 65536  
SOLVENT CDCl3  
NS 16  
DS 0  
SWH 8012.820 Hz  
FIDRES 0.122266 Hz  
AQ 4.0894966 sec  
RG 205.92  
DW 62.400 usec  
DE 16.53 usec  
TE 296.7 K  
D1 2.00000000 sec  
TD0 1

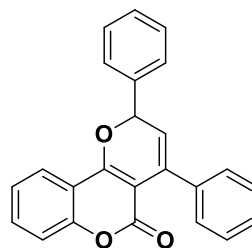

1a

==== CHANNEL f1 =====  
SFO1 400.1324008 MHz  
NUC1 1H  
P1 14.00 usec  
SI 16384  
SF 400.1300100 MHz  
WDW EM  
SSB 0  
LB 0.00 Hz  
GB 0  
PC 1.00

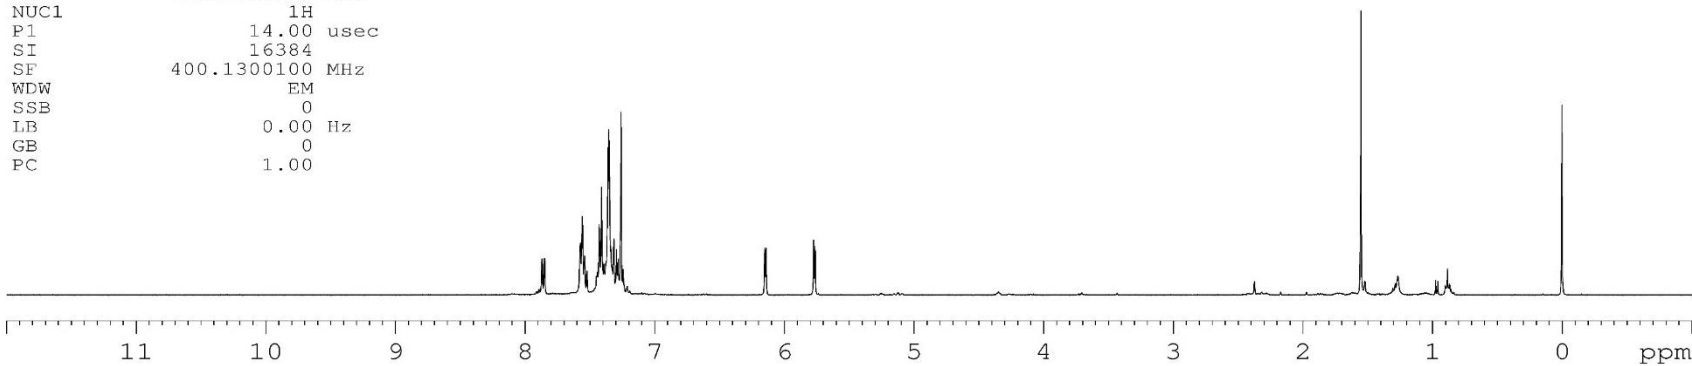

1.000  
3.000  
3.189  
5.064  
1.263  
2.313

0.874  
0.868

DYY-VS-2-209

NAME DYY-VS-2-209  
EXPNO 1  
PROCNO 1  
Date\_ 20240510  
Time 10.14  
INSTRUM spect  
PROBHD 5 mm PABBO BB/  
PULPROG zg30  
TD 65536  
SOLVENT CDC13  
NS 16  
DS 0  
SWH 8012.820 Hz  
FIDRES 0.122266 Hz  
AQ 4.0894966 sec  
RG 205.92  
DW 62.400 usec  
DE 16.53 usec  
TE 296.0 K  
D1 2.00000000 sec  
TD0 1

===== CHANNEL f1 =====  
SFO1 400.1324008 MHz  
NUC1 1H  
P1 14.00 usec  
SI 16384  
SF 400.1300100 MHz  
WDW EM  
SSB 0  
LB 0.00 Hz  
GB 0  
PC 1.00

7.759  
7.737  
7.566  
7.562  
7.546  
7.442  
7.435  
7.421  
7.402  
7.386  
7.351  
7.346  
7.260  
6.843  
6.837  
6.821  
6.815  
6.788  
6.782  
6.108  
6.098  
5.712  
5.702  
3.864

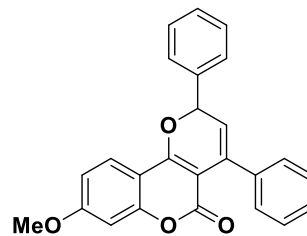

1b

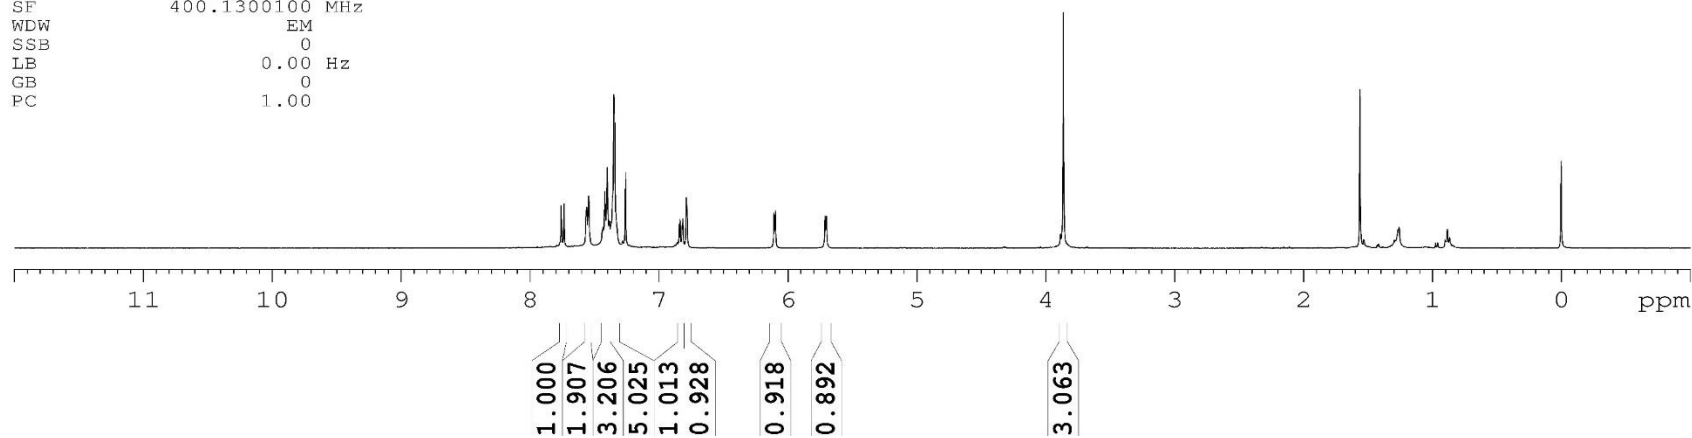

163.568  
 161.853  
 158.998  
 155.526  
 138.363  
 138.037  
 135.286  
 129.109  
 128.804  
 127.800  
 127.700  
 127.407  
 124.435  
 119.217  
 112.452  
 108.349  
 100.259  
 78.660  
 77.318  
 77.000  
 76.682  
 55.742

DYY-VS-2-209C

NAME DYY-VS-2-209C  
 EXPNO 1  
 PROCNO 1  
 Date\_ 20240517  
 Time 11.07  
 INSTRUM spect  
 PROBHD 5 mm PABBO BB/  
 PULPROG zgpg30  
 TD 65536  
 SOLVENT CDC13  
 NS 600  
 DS 0  
 SWH 24038.461 Hz  
 FIDRES 0.366798 Hz  
 AQ 1.3631988 sec  
 RG 205.92  
 DW 20.800 usec  
 DE 6.50 usec  
 TE 297.5 K  
 D1 2.00000000 sec  
 D11 0.03000000 sec  
 TD0 1

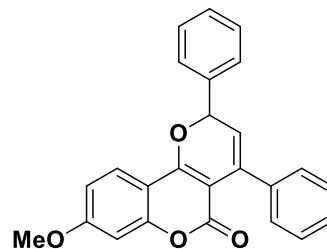

1b

==== CHANNEL f1 =====  
 SFO1 100.6233329 MHz  
 NUC1 13C  
 P1 10.00 usec  
 SI 32768  
 SF 100.6127772 MHz  
 WDW EM  
 SSB 0  
 LB 2.00 Hz  
 GB 0  
 PC 1.00

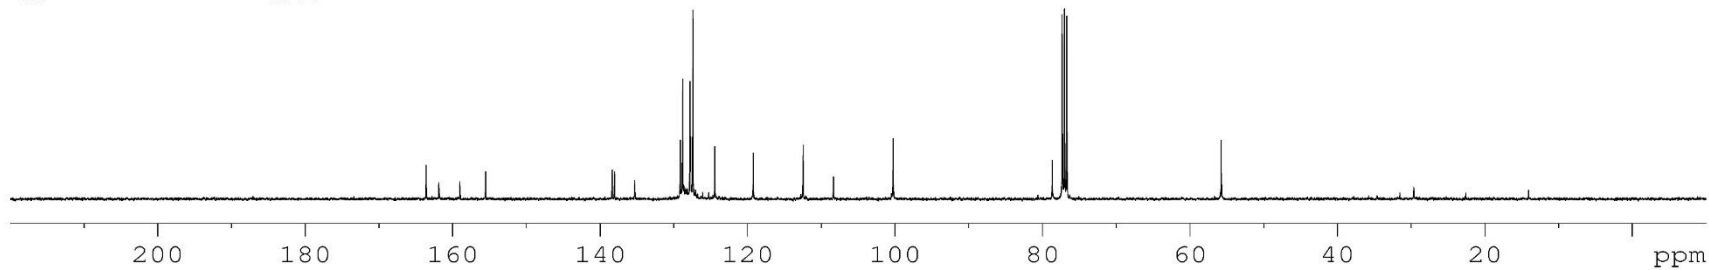

7.664  
7.642  
7.566  
7.562  
7.546  
7.430  
7.424  
7.419  
7.408  
7.390  
7.377  
7.369  
7.343  
7.260  
6.601  
6.595  
6.578  
6.572  
6.469  
6.463  
6.048  
6.038  
5.644  
5.634

3.055

DYY-VS-3-269

NAME DYY-VS-3-269  
EXPNO 1  
PROCNO 1  
Date\_ 20240719  
Time 10.13  
INSTRUM spect  
PROBHD 5 mm PABBO BB/  
PULPROG zg30  
TD 65536  
SOLVENT CDC13  
NS 16  
DS 0  
SWH 8012.820 Hz  
FIDRES 0.122266 Hz  
AQ 4.0894966 sec  
RG 205.92  
DW 62.400 usec  
DE 16.53 usec  
TE 291.4 K  
D1 2.00000000 sec  
TD0 1

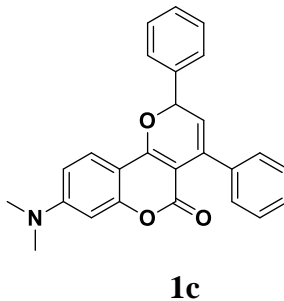

==== CHANNEL f1 =====  
SFO1 400.1324008 MHz  
NUC1 1H  
P1 14.00 usec  
SI 16384  
SF 400.1300098 MHz  
WDW EM  
SSB 0  
LB 0.00 Hz  
GB 0  
PC 1.00

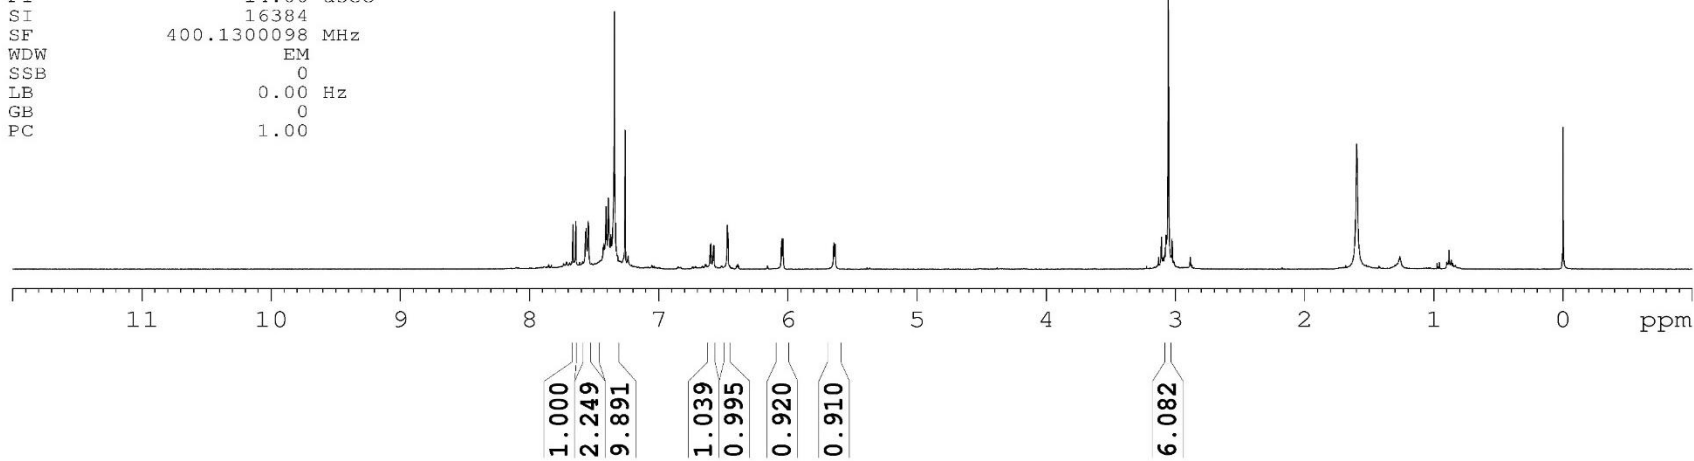

162.578  
159.630  
155.864  
153.535  
138.785  
138.448  
135.735  
128.893  
128.715  
127.736  
127.531  
127.427  
127.388  
124.221  
118.141  
108.743  
103.798  
98.242  
97.525  
78.394  
77.318  
77.000  
76.682

40.117

DYY-VS-3-269C

NAME DYY-VS-3-269C  
EXPNO 1  
PROCNO 1  
Date\_ 20240719  
Time\_ 10.46  
INSTRUM spect  
PROBHD 5 mm PABBO BB/  
PULPROG zgpg30  
TD 65536  
SOLVENT CDCl3  
NS 500  
DS 0  
SWH 24038.461 Hz  
FIDRES 0.366798 Hz  
AQ 1.3631988 sec  
RG 205.92  
DW 20.800 usec  
DE 6.50 usec  
TE 292.5 K  
D1 2.00000000 sec  
D11 0.03000000 sec  
TD0 1

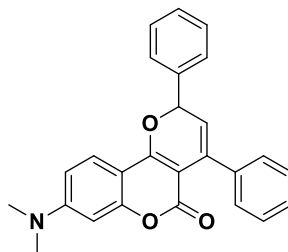

1c

===== CHANNEL f1 =====  
SFO1 100.6233329 MHz  
NUC1 13C  
P1 10.00 usec  
SI 32768  
SF 100.6127767 MHz  
WDW EM  
SSB 0  
LB 2.00 Hz  
GB 0  
PC 1.00

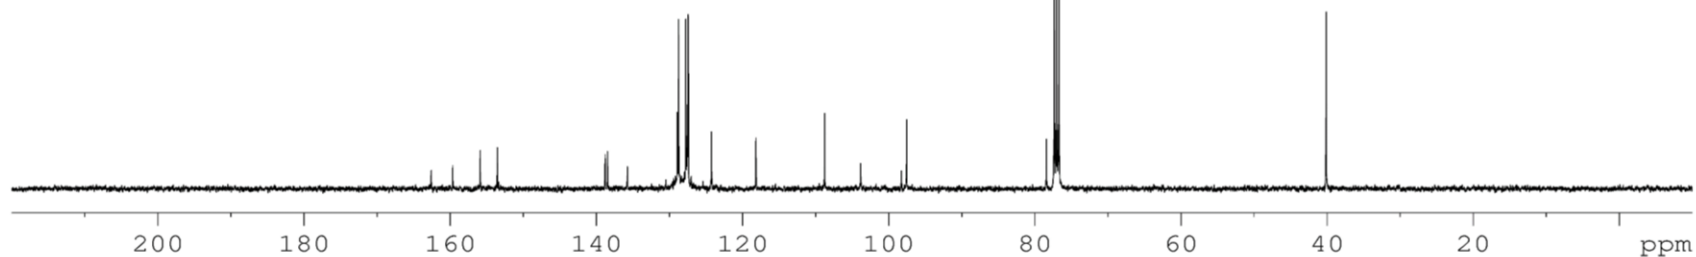

7.809  
7.803  
7.577  
7.573  
7.557  
7.492  
7.486  
7.470  
7.464  
7.452  
7.434  
7.421  
7.394  
7.381  
7.372  
7.368  
7.343  
7.334  
7.324  
7.319  
7.260  
7.258  
7.235  
6.165  
6.155  
5.795  
5.785

DYY-VS-2-227-1

NAME DYY-VS-2-227-1  
EXPNO 2  
PROCNO 1  
Date\_ 20240524  
Time 12.37  
INSTRUM spect  
PROBHD 5 mm PABBO BB/  
PULPROG zg30  
TD 65536  
SOLVENT CDC13  
NS 16  
DS 0  
SWH 8012.820 Hz  
FIDRES 0.122266 Hz  
AQ 4.0894966 sec  
RG 205.92  
DW 62.400 usec  
DE 16.53 usec  
TE 290.7 K  
D1 2.00000000 sec  
TD0 1

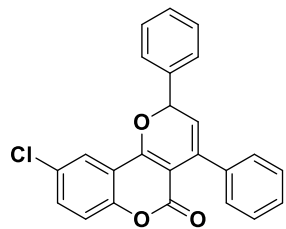

1d

==== CHANNEL f1 =====  
SFO1 400.1324008 MHz  
NUC1 1H  
P1 14.00 usec  
SI 16384  
SF 400.1300094 MHz  
WDW EM  
SSB 0  
LB 0.00 Hz  
GB 0  
PC 1.00

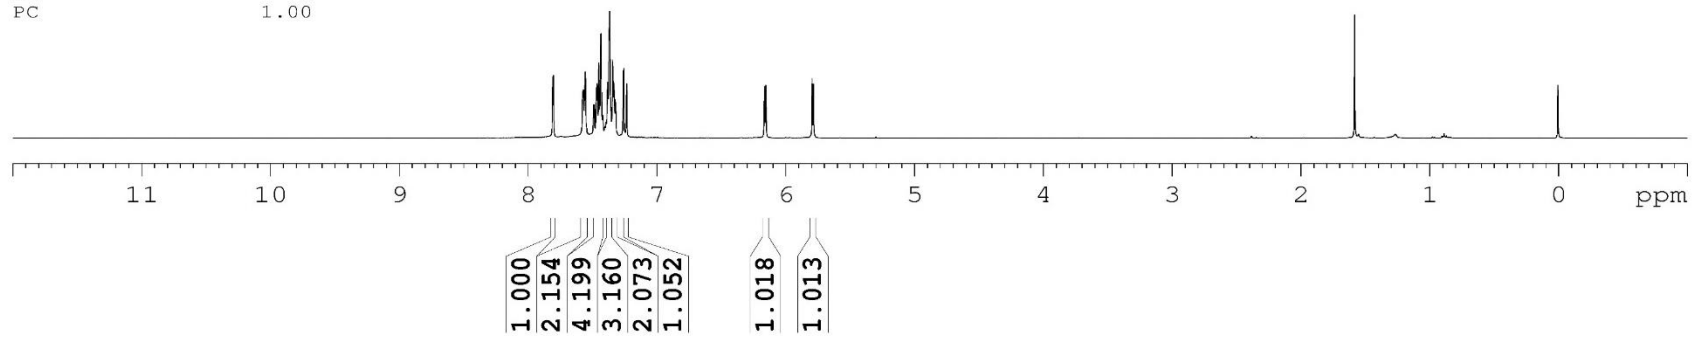

160.071  
158.145  
151.855  
137.774  
137.548  
134.882  
132.520  
129.475  
128.984  
127.964  
127.941  
127.596  
127.368  
122.680  
120.726  
118.064  
116.300  
103.345

79.010  
77.318  
77.000  
76.682

DYY-VS-2-227C

NAME DYY-VS-2-227C  
EXPNO 1  
PROCNO 1  
Date\_ 20240524  
Time 12.34  
INSTRUM spect  
PROBHD 5 mm PABBO BB/  
PULPROG zgpg30  
TD 65536  
SOLVENT CDCl3  
NS 2000  
DS 0  
SWH 24038.461 Hz  
FIDRES 0.366798 Hz  
AQ 1.3631988 sec  
RG 205.92  
DW 20.800 usec  
DE 6.50 usec  
TE 291.8 K  
D1 2.00000000 sec  
D11 0.03000000 sec  
TD0 1

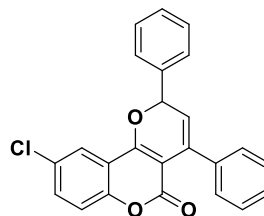

1d

==== CHANNEL f1 =====  
SF01 100.6233329 MHz  
NUC1 13C  
P1 10.00 usec  
SI 32768  
SF 100.6127742 MHz  
WDW EM  
SSB 0  
LB 2.00 Hz  
GB 0  
PC 1.00

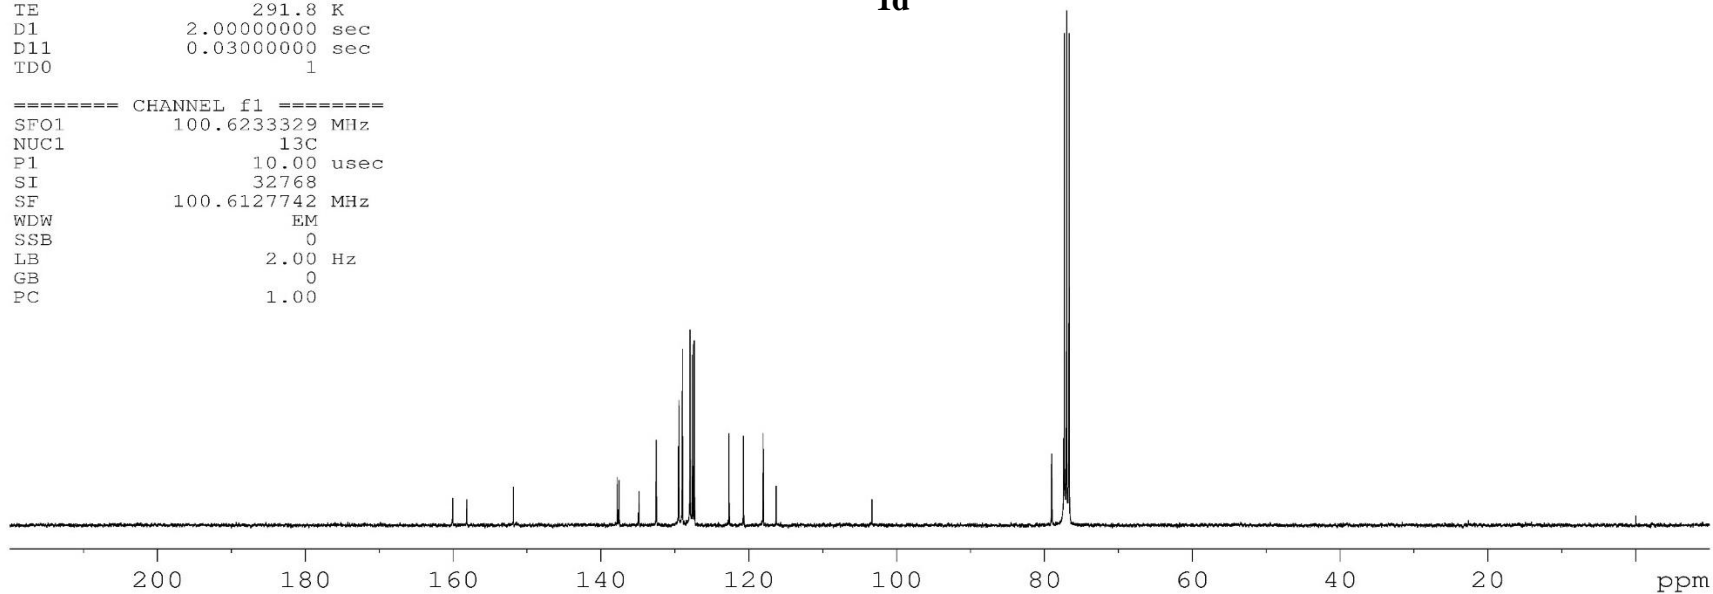



7.868  
7.865  
7.848  
7.845  
7.575  
7.572  
7.554  
7.536  
7.454  
7.446  
7.433  
7.415  
7.401  
7.386  
7.343  
7.300  
7.291  
7.277  
7.272  
7.260  
7.256  
6.149  
6.139  
5.753  
5.742

DYY-VS-3-253

NAME DYY-VS-3-253  
EXPNO 1  
PROCNO 1  
Date\_ 20240702  
Time 10.52  
INSTRUM spect  
PROBHD 5 mm PABBO BB/  
PULPROG zg30  
TD 65536  
SOLVENT CDCl3  
NS 16  
DS 0  
SWH 8012.820 Hz  
FIDRES 0.122266 Hz  
AQ 4.0894966 sec  
RG 205.92  
DW 62.400 usec  
DE 16.53 usec  
TE 292.9 K  
D1 2.00000000 sec  
TD0 1

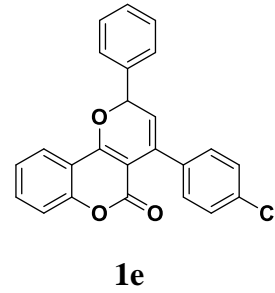

===== CHANNEL f1 =====  
SFO1 400.1324008 MHz  
NUC1 1H  
P1 14.00 usec  
SI 16384  
SF 400.1300098 MHz  
WDW EM  
SSB 0  
LB 0.00 Hz  
GB 0  
PC 1.00

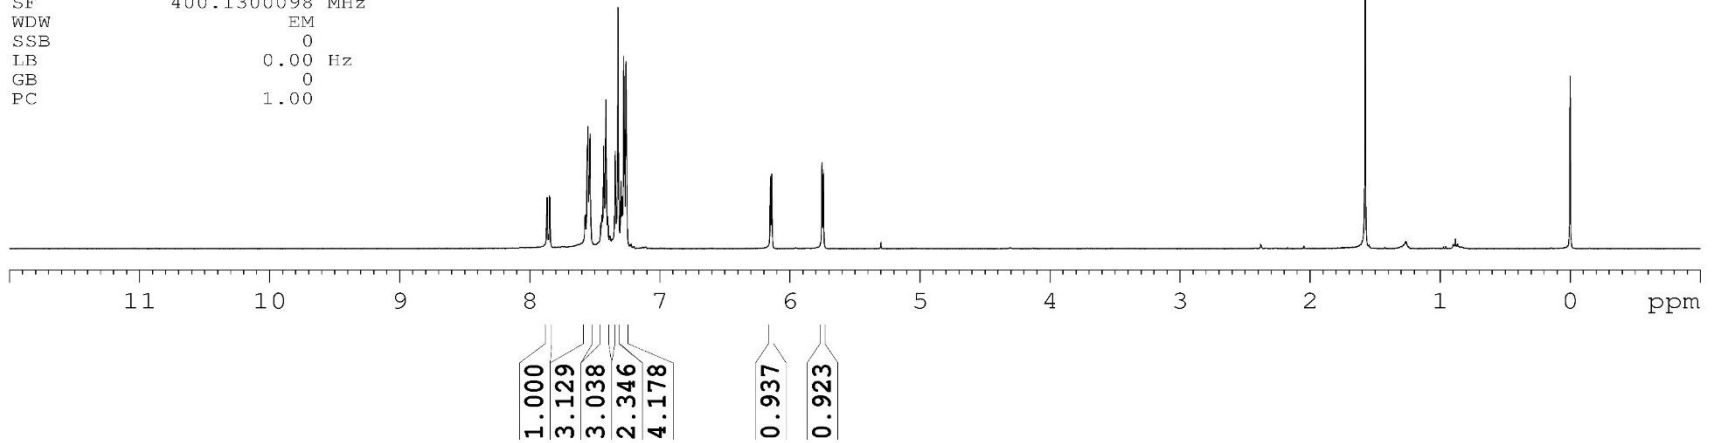

DYY-VS-3-253C

NAME DYY-VS-3-253C  
EXPNO 1  
PROCNO 1  
Date\_ 20240702  
Time\_ 11.07  
INSTRUM spect  
PROBHD 5 mm PABBO BB/  
PULPROG zgpg30  
ID 65536  
SOLVENT CDC13  
NS 210  
DS 0  
SWH 24038.461 Hz  
FIDRES 0.366798 Hz  
AQ 1.3631988 sec  
RG 205.92  
DW 20.800 usec  
DE 6.50 usec  
TE 294.0 K  
D1 2.00000000 sec  
D11 0.03000000 sec  
TD0 1

161.476  
158.645  
153.527  
137.951  
136.313  
134.113  
133.670  
132.757  
129.324  
128.924  
128.754  
128.066  
127.391  
123.998  
123.296  
120.502  
116.601  
115.038  
102.295  
  
78.670  
77.318  
77.000  
76.682

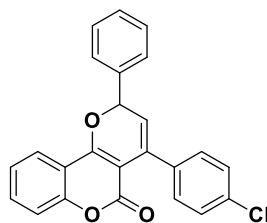

1e

==== CHANNEL f1 =====  
SFO1 100.6233329 MHz  
NUC1 13C  
P1 10.00 usec  
SI 32768  
SF 100.6127764 MHz  
WDW EM  
SSB 0  
LB 2.00 Hz  
GB 0  
PC 1.00

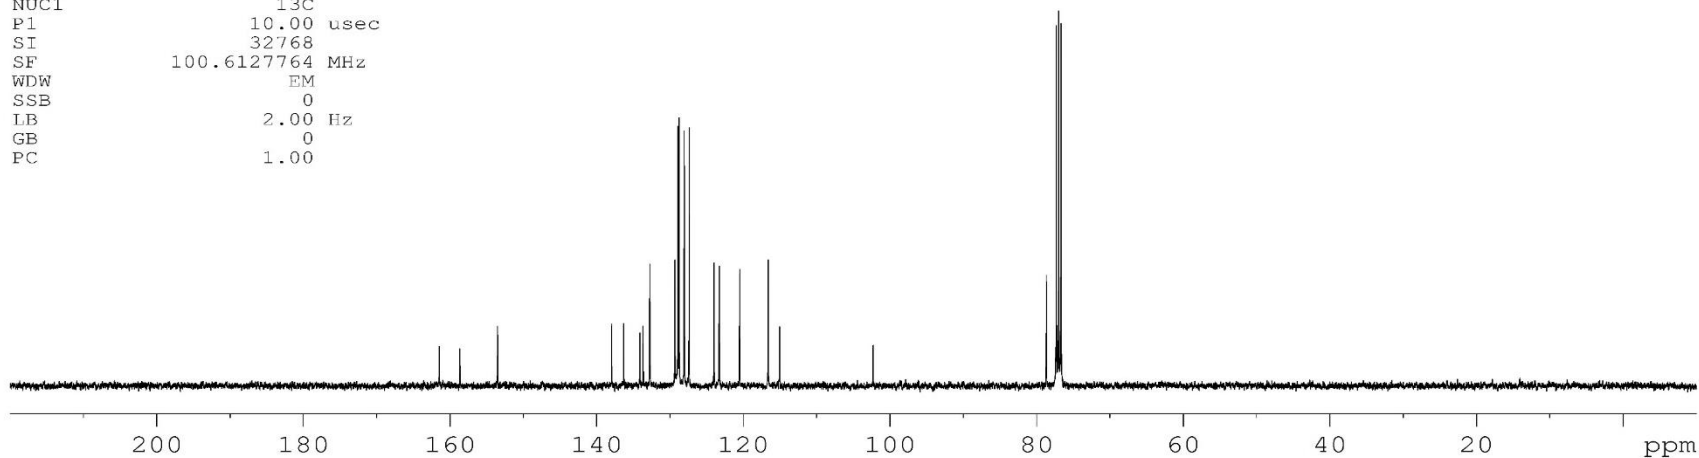

7.865  
7.862  
7.846  
7.843  
7.571  
7.567  
7.552  
7.539  
7.520  
7.517  
7.445  
7.438  
7.423  
7.405  
7.390  
7.375  
7.370  
7.315  
7.295  
7.278  
7.260  
7.247  
7.227  
7.186  
7.166  
6.131  
6.120  
5.753  
5.742

2.380

DYY-VS-3-263

NAME DYY-VS-3-263  
EXPNO 1  
PROCNO 1  
Date\_ 20240712  
Time 10.22  
INSTRUM spect  
PROBHD 5 mm PABBO BB/  
PULPROG zg30  
TD 65536  
SOLVENT CDCl3  
NS 16  
DS 0  
SWH 8012.820 Hz  
FIDRES 0.1222266 Hz  
AQ 4.0894966 sec  
RG 205.92  
DW 62.400 usec  
DE 16.53 usec  
TE 291.6 K  
D1 2.00000000 sec  
TD0 1

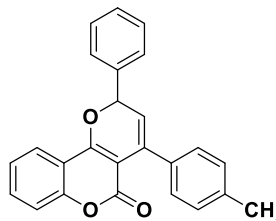

1f

==== CHANNEL f1 =====  
SFO1 400.1324008 MHz  
NUC1 1H  
P1 14.00 usec  
SI 16384  
SF 400.1300100 MHz  
WDW EM  
SSB 0  
LB 0.00 Hz  
GB 0  
PC 1.00

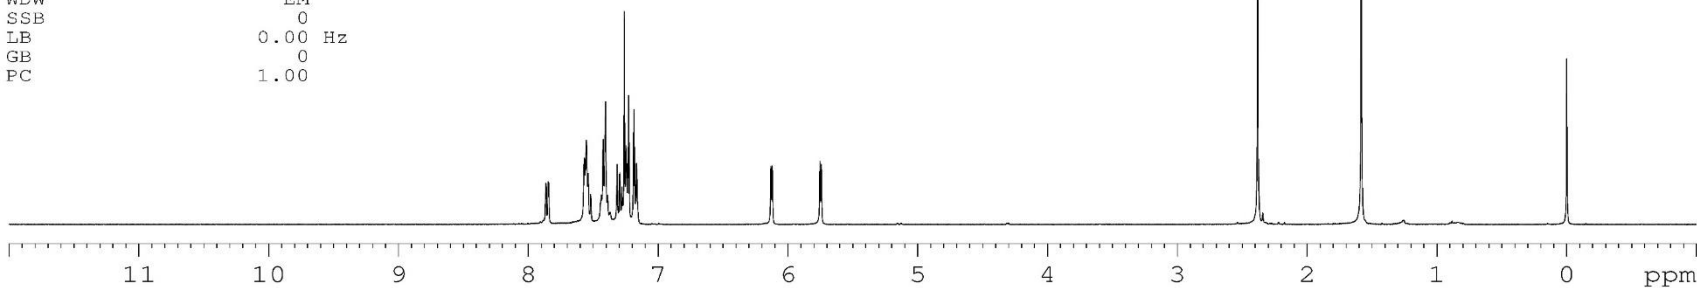

1.000  
3.187  
3.026  
1.197  
1.616  
2.209  
2.093  
0.994  
0.980  
3.029

DYY-VS-3-263C

NAME DYY-VS-3-263C  
EXPNO 1  
PROCNO 1  
Date\_ 20240712  
Time\_ 11.17  
INSTRUM spect  
PROBHD 5 mm PABBO BB/  
PULPROG zgpg30  
TD 65536  
SOLVENT CDC13  
NS 450  
DS 0  
SWH 24038.461 Hz  
FIDRES 0.366798 Hz  
AQ 1.3631988 sec  
RG 205.92  
DW 20.800 usec  
DE 6.50 usec  
TE 293.1 K  
D1 2.00000000 sec  
D11 0.03000000 sec  
TD0 1

161.311  
158.701  
153.533  
138.204  
137.599  
135.092  
134.872  
132.519  
129.204  
128.848  
128.650  
127.499  
127.234  
123.865  
123.242  
119.713  
116.573  
115.198  
102.884

78.715  
77.318  
77.000  
76.683

21.293

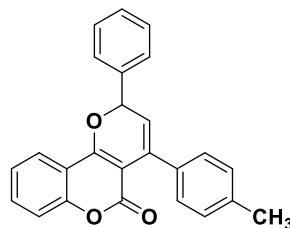

1f

==== CHANNEL f1 =====  
SFO1 100.6233329 MHz  
NUC1 13C  
P1 10.00 usec  
SI 32768  
SF 100.6127750 MHz  
WDW EM  
SSB 0  
LB 2.00 Hz  
GB 0  
PC 1.00

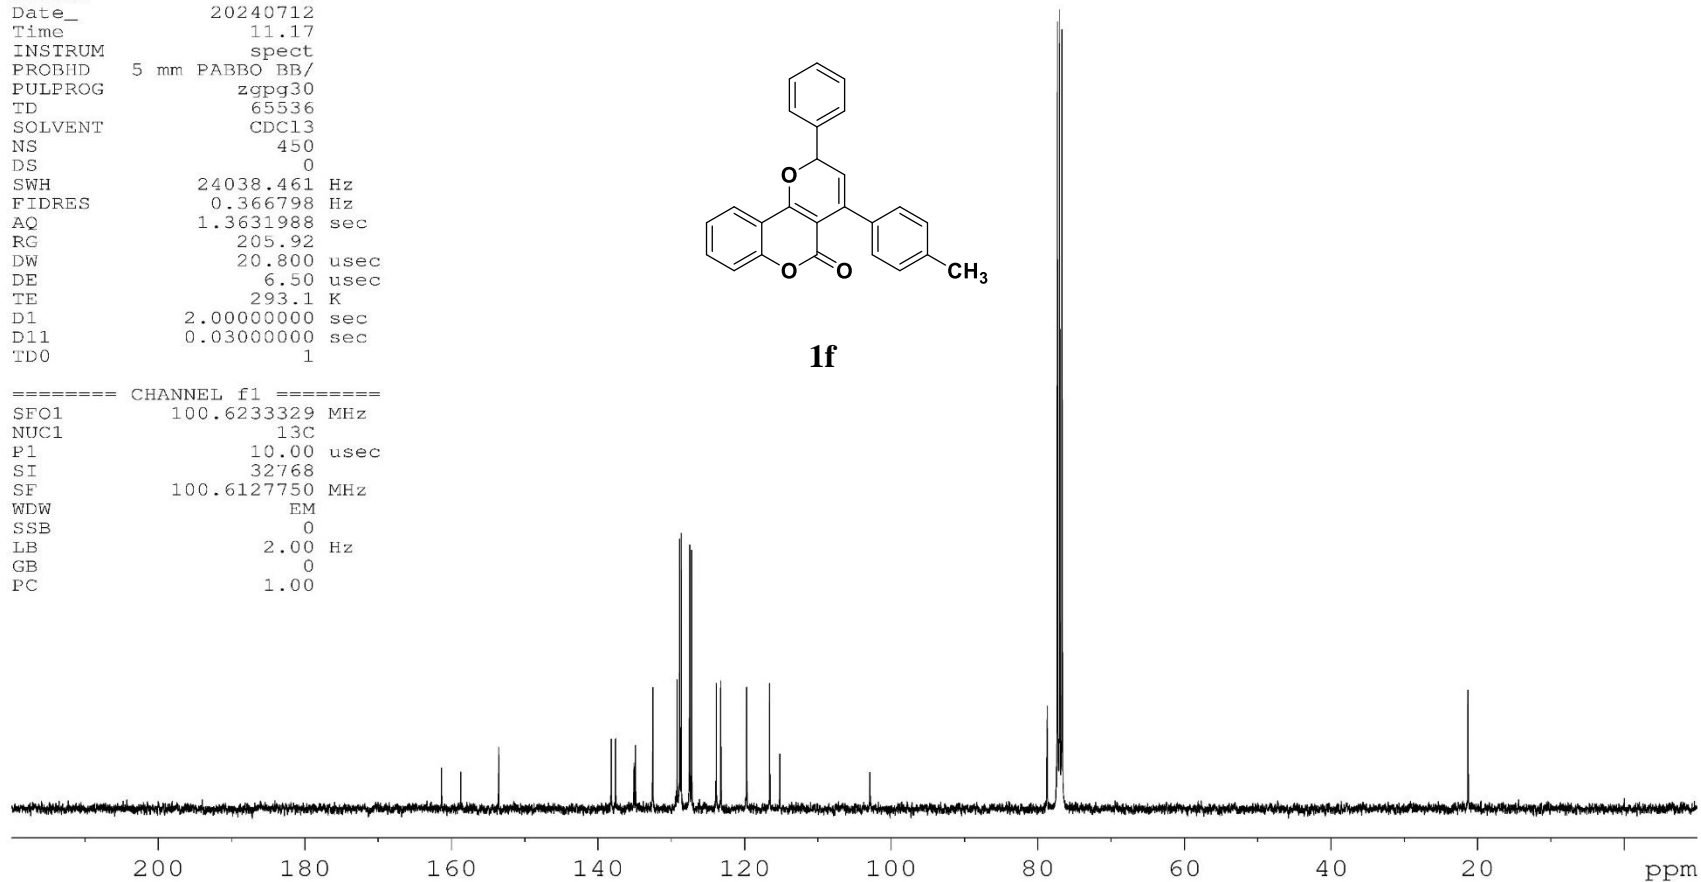

8.302  
8.280  
7.882  
7.880  
7.862  
7.860  
7.756  
7.735  
7.611  
7.607  
7.590  
7.572  
7.568  
7.386  
7.376  
7.370  
7.362  
7.344  
7.335  
7.324  
7.315  
7.313  
7.295  
7.260  
6.245  
6.235  
5.757  
5.746

DYY-JNS-146-1-0903

NAME DYY-JNS-146-1-0903  
EXPNO 1  
PROCNO 1  
Date\_ 20240903  
Time 13.01  
INSTRUM spect  
PROBHD 5 mm PABBO BB/  
PULPROG zg30  
TD 65536  
SOLVENT CDCl3  
NS 16  
DS 0  
SWH 8012.820 Hz  
FIDRES 0.122266 Hz  
AQ 4.0894966 sec  
RG 205.92  
DW 62.400 usec  
DE 16.53 usec  
TE 292.0 K  
D1 2.0000000 sec  
TD0 1

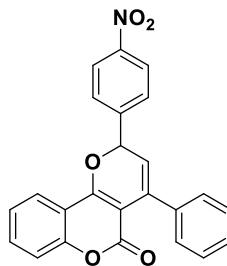

**1g**

===== CHANNEL f1 =====  
SFO1 400.1324008 MHz  
NUC1 1H  
P1 14.00 usec  
SI 16384  
SF 400.1300101 MHz  
WDW EM  
SSB 0  
LB 0.00 Hz  
GB 0  
PC 1.00

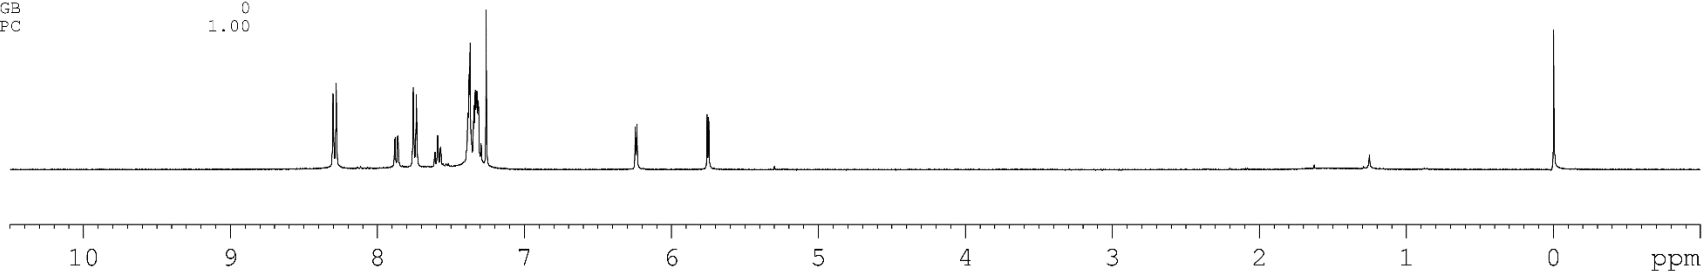

2.000  
1.022  
2.069  
1.199  
3.289  
4.426  
0.918  
0.907

160.990  
 158.237  
 153.568  
 148.215  
 145.116  
 137.254  
 136.112  
 133.004  
 128.107  
 127.942  
 127.887  
 127.313  
 124.141  
 124.074  
 123.035  
 118.755  
 116.721  
 114.700  
 103.023  
 77.318  
 77.177  
 77.000  
 76.682

DYY-JNS-146C

NAME DYY-JNS-146C  
 EXPNO 1  
 PROCNO 1  
 Date\_ 20240322  
 Time 12.15  
 INSTRUM spect  
 PROBHD 5 mm PABBO BB/  
 PULPROG zgpg30  
 TD 65536  
 SOLVENT CDC13  
 NS 800  
 DS 0  
 SWH 24038.461 Hz  
 FIDRES 0.366798 Hz  
 AQ 1.3631988 sec  
 RG 205.92  
 DW 20.800 usec  
 DE 6.50 usec  
 TE 297.8 K  
 D1 2.00000000 sec  
 D11 0.03000000 sec  
 TD0 1

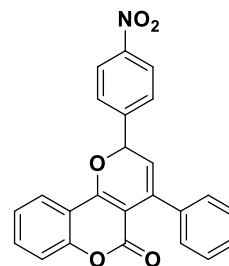

**1g**

===== CHANNEL f1 =====  
 SFO1 100.6233329 MHz  
 NUC1 13C  
 P1 10.00 usec  
 SI 32768  
 SF 100.6127783 MHz  
 WDW EM  
 SSB 0  
 LB 2.00 Hz  
 GB 0  
 PC 1.00

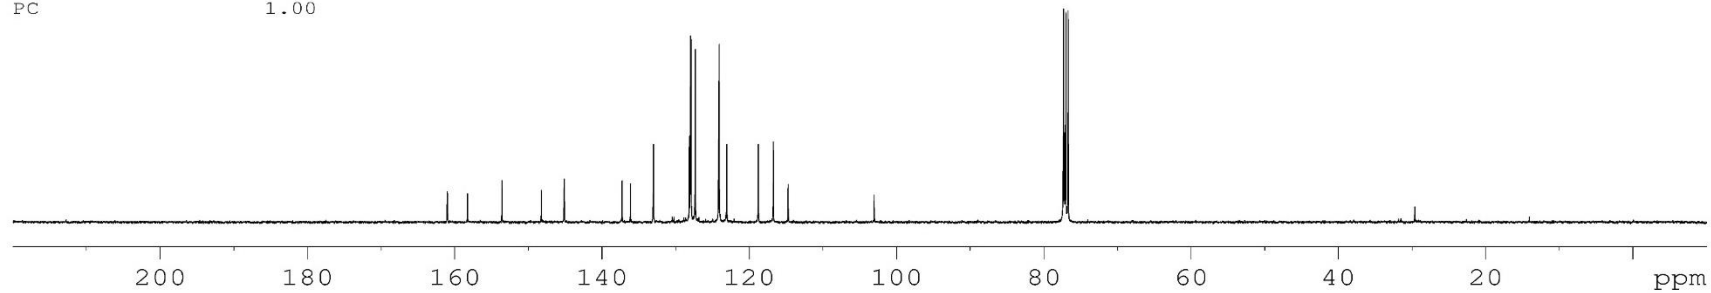

8.289  
8.268  
7.766  
7.744  
7.739  
7.718  
7.384  
7.372  
7.364  
7.359  
7.341  
7.330  
7.321  
7.311  
7.306  
7.260  
6.885  
6.879  
6.863  
6.857  
6.805  
6.799  
6.199  
6.188  
5.688  
5.677  
3.880

DYY-VS-3-228

NAME DYY-VS-3-228  
EXPNO 1  
PROCNO 1  
Date\_ 20240528  
Time 10.17  
INSTRUM spect  
PROBHD 5 mm PABBO BB/  
PULPROG zg30  
TD 65536  
SOLVENT CDC13  
NS 16  
DS 0  
SWH 8012.820 Hz  
FIDRES 0.122266 Hz  
AQ 4.0894966 sec  
RG 205.92  
DW 62.400 usec  
DE 16.53 usec  
TE 296.2 K  
D1 2.00000000 sec  
TD0 1

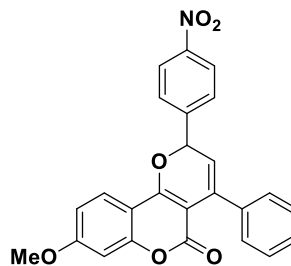

**1h**

==== CHANNEL f1 =====  
SFO1 400.1324008 MHz  
NUC1 1H  
P1 14.00 usec  
SI 16384  
SF 400.1300100 MHz  
WDW EM  
SSB 0  
LB 0.00 Hz  
GB 0  
PC 1.00

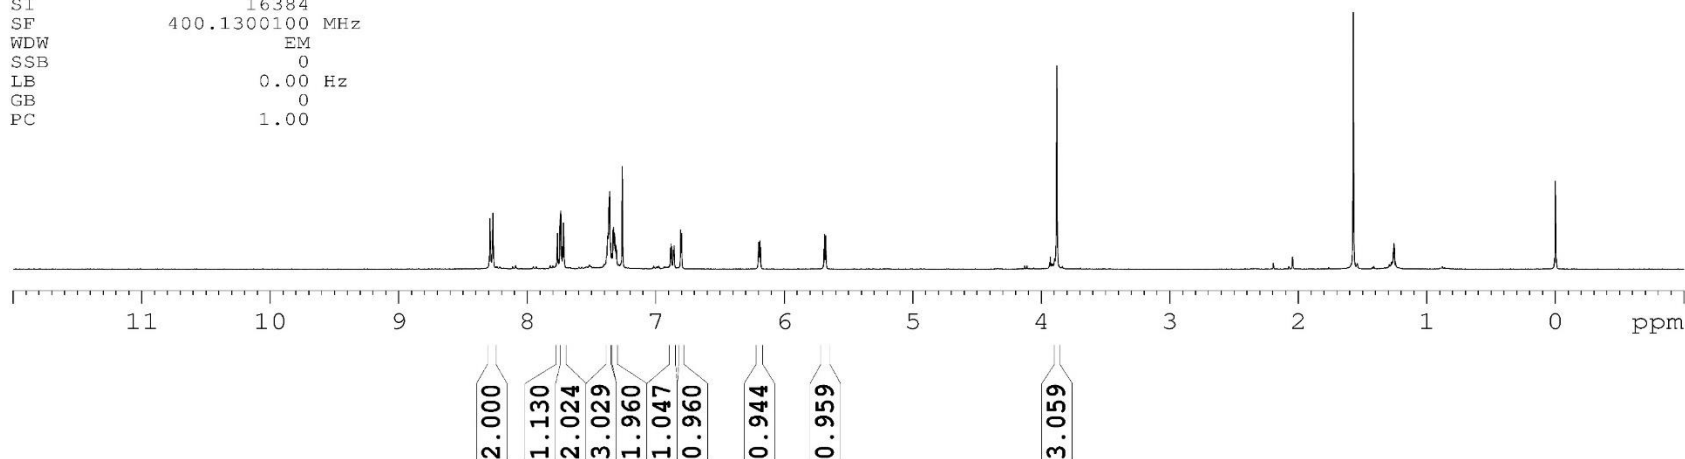

163.915  
 161.580  
 158.685  
 155.639  
 148.168  
 145.356  
 137.450  
 136.303  
 128.061  
 127.936  
 127.889  
 127.348  
 124.254  
 124.076  
 117.699  
 112.826  
 107.867  
 100.459  
 100.395  
 77.317  
 77.132  
 77.000  
 76.682  
 55.843

DYY-VS-3-228C

NAME DYY-VS-3-228C  
 EXPNO 1  
 PROCNO 1  
 Date\_ 20240531  
 Time 12.36  
 INSTRUM spect  
 PROBHD 5 mm PABBO BB/  
 PULPROG zgpg30  
 TD 65536  
 SOLVENT CDC13  
 NS 1200  
 DS 0  
 SWH 24038.461 Hz  
 FIDRES 0.366798 Hz  
 AQ 1.3631988 sec  
 RG 205.92  
 DW 20.800 usec  
 DE 6.50 usec  
 TE 293.1 K  
 D1 2.00000000 sec  
 D11 0.03000000 sec  
 TD0 1

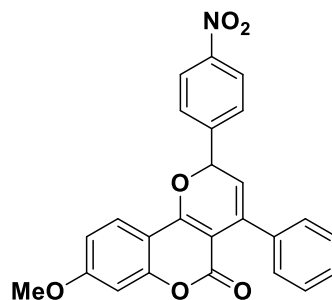

1h

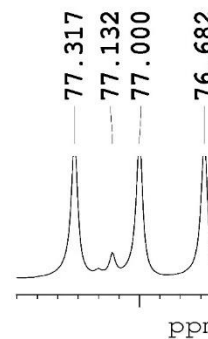

===== CHANNEL f1 =====  
 SF01 100.6233329 MHz  
 NUC1 13C  
 P1 10.00 usec  
 SI 32768  
 SF 100.6127754 MHz  
 WDW EM  
 SSB 0  
 LB 2.00 Hz  
 GB 0  
 PC 1.00

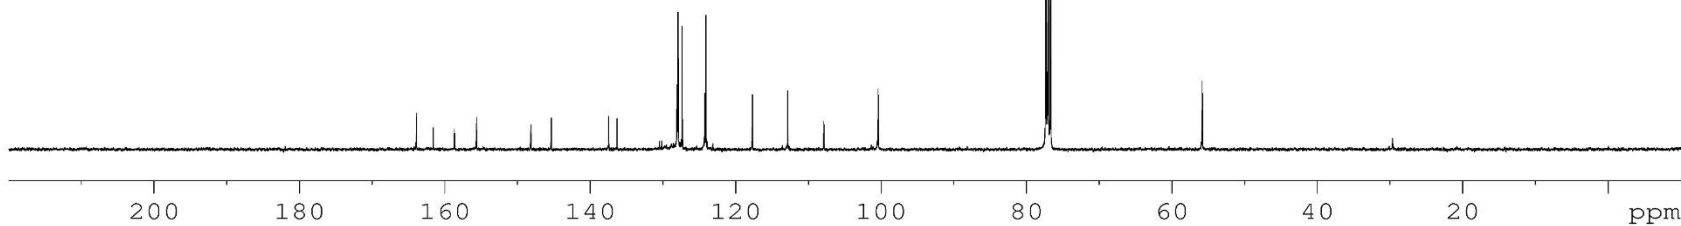



7.838  
7.818  
7.815  
7.546  
7.543  
7.525  
7.513  
7.508  
7.491  
7.361  
7.354  
7.300  
7.279  
7.260  
7.244  
7.225  
6.942  
6.920  
6.109  
6.098  
5.766  
5.755

DYY-JNS-149-0903  
NAME DYY-JNS-149-0903  
EXPNO 1  
PROCNO 1  
Date\_ 20240903  
Time 12.44  
INSTRUM spect  
PROBHD 5 mm PABBO BB/  
PULPROG zg30  
TD 65536  
SOLVENT CDCl3  
NS 16  
DS 0  
SWH 8012.820 Hz  
FIDRES 0.122266 Hz  
AQ 4.0894966 sec  
RG 205.92  
DW 62.400 usec  
DE 16.53 usec  
TE 291.3 K  
D1 2.0000000 sec  
TD0 1

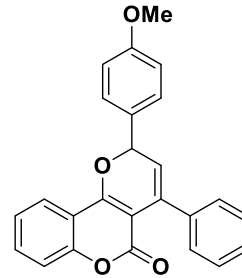

**1i**

3.816

==== CHANNEL f1 =====  
SFO1 400.1324008 MHz  
NUC1 1H  
P1 14.00 usec  
SI 16384  
SF 400.1300101 MHz  
WDW EM  
SSB 0  
LB 0.00 Hz  
GB 0  
PC 1.00

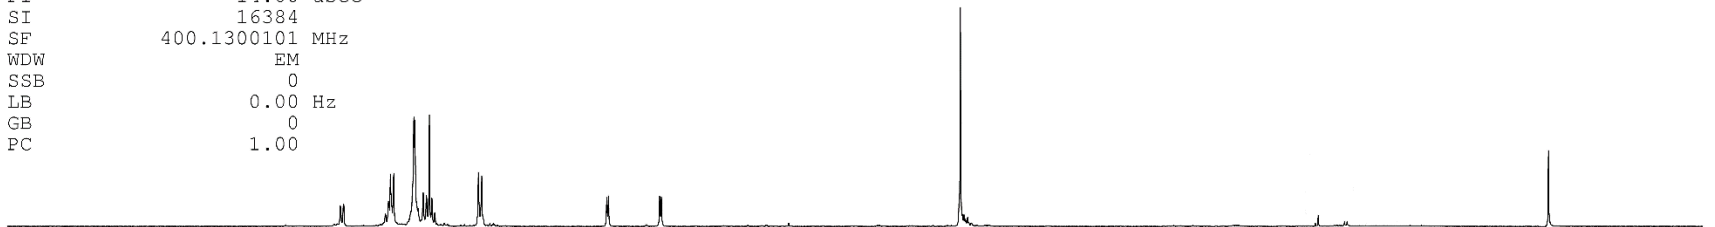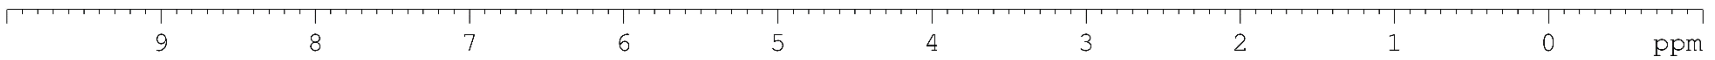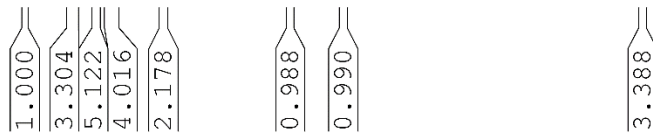

161.231  
 160.380  
 158.773  
 153.498  
 137.933  
 135.147  
 132.488  
 129.921  
 129.357  
 127.878  
 127.789  
 127.358  
 123.835  
 123.261  
 120.163  
 116.536  
 115.273  
 114.190  
 102.620  
  
 78.510  
 77.318  
 77.000  
 76.683  
  
 — 55.307

DYY-JNS-149C

NAME DYY-JNS-149C  
 EXPNO 1  
 PROCNO 1  
 Date\_ 20240326  
 Time 11.17  
 INSTRUM spect  
 PROBHD 5 mm PABBO BB/  
 PULPROG zgpg30  
 TD 32768  
 SOLVENT CDC13  
 NS 1500  
 DS 0  
 SWH 24038.461 Hz  
 FIDRES 0.733596 Hz  
 AQ 0.6816244 sec  
 RG 205.92  
 DW 20.800 usec  
 DE 6.50 usec  
 TE 292.1 K  
 D1 2.00000000 sec  
 D11 0.03000000 sec  
 TD0 1

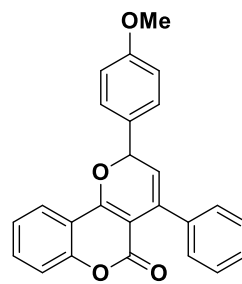

1i

===== CHANNEL f1 =====  
 SFO1 100.6233329 MHz  
 NUC1 13C  
 P1 10.00 usec  
 SI 32768  
 SF 100.6127757 MHz  
 WDW EM  
 SSB 0  
 LB 2.00 Hz  
 GB 0  
 PC 1.00

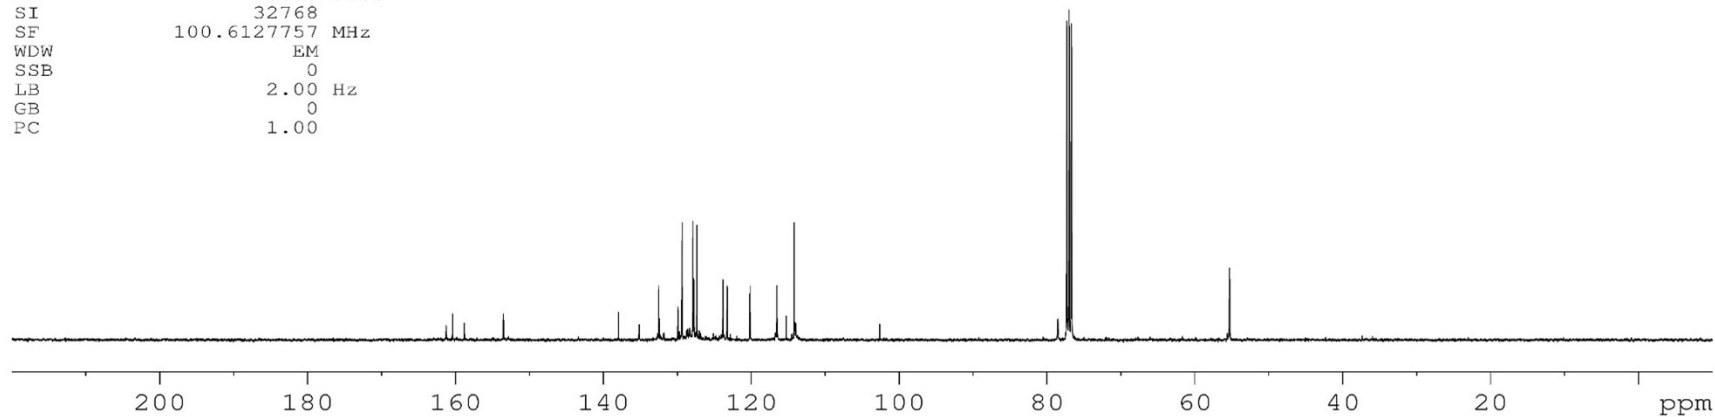

7.847  
7.845  
7.827  
7.586  
7.566  
7.548  
7.500  
7.495  
7.478  
7.473  
7.322  
7.301  
7.293  
7.260  
6.958  
6.936  
6.163  
6.152  
5.828  
5.817

DYY-VS-3-237-0903

NAME DYY-VS-3-237-0903  
 EXPNO 1  
 PROCNO 1  
 Date\_ 20240903  
 Time 13.19  
 INSTRUM spect  
 PROBHD 5 mm PABEO BB/  
 PULPROG zg30  
 TD 65536  
 SOLVENT CDCl3  
 NS 16  
 DS 0  
 SWH 8012.820 Hz  
 FIDRES 0.122266 Hz  
 AQ 4.0894966 sec  
 RG 205.92  
 DW 62.400 usec  
 DE 16.53 usec  
 TE 291.6 K  
 D1 2.0000000 sec  
 TDO 1

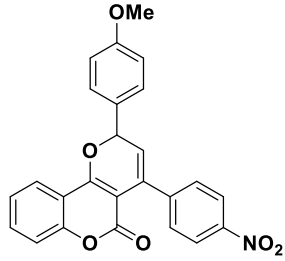

1j

— 3.821

===== CHANNEL f1 =====  
 SP01 400.1324008 MHz  
 NUCL1 1H  
 P1 14.00 usec  
 SI 16384  
 SF 400.1300100 MHz  
 WDW EM  
 SSB 0  
 LB 0.00 Hz  
 GB 0  
 PC 1.00

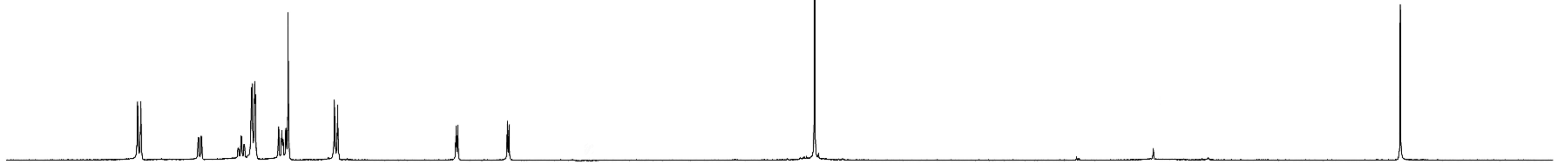

9 8 7 6 5 4 3 2 1 0 ppm

2.043  
1.124  
1.298  
4.188  
1.553  
2.536  
1.992  
1.044  
0.979  
3.000

161.655  
 160.616  
 158.780  
 153.538  
 147.293  
 144.853  
 133.380  
 133.031  
 129.372  
 129.264  
 128.354  
 124.152  
 123.413  
 123.219  
 122.048  
 116.682  
 114.993  
 114.388  
 101.551  
 78.528  
 77.317  
 77.000  
 76.682  
 55.349

DYY-VS-3-237C

NAME DYY-VS-3-237C  
 EXPNO 1  
 PROCNO 1  
 Date\_ 20240614  
 Time 12.36  
 INSTRUM spect  
 PROBHD 5 mm PABBO BB/  
 PULPROG zgpg30  
 TD 65536  
 SOLVENT CDCl3  
 NS 1200  
 DS 0  
 SWH 24038.461 Hz  
 FIDRES 0.366798 Hz  
 AQ 1.3631988 sec  
 RG 205.92  
 DW 20.800 usec  
 DE 6.50 usec  
 TE 293.1 K  
 D1 2.0000000 sec  
 D11 0.0300000 sec  
 TD0 1

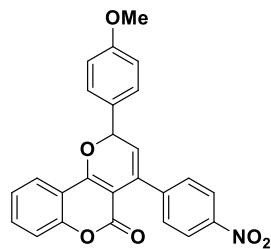

1j

===== CHANNEL f1 =====  
 SFO1 100.6233329 MHz  
 NUC1 13C  
 P1 10.00 usec  
 SI 32768  
 SF 100.6127740 MHz  
 WDW EM  
 SSB 0  
 LB 2.00 Hz  
 GB 0  
 PC 1.00

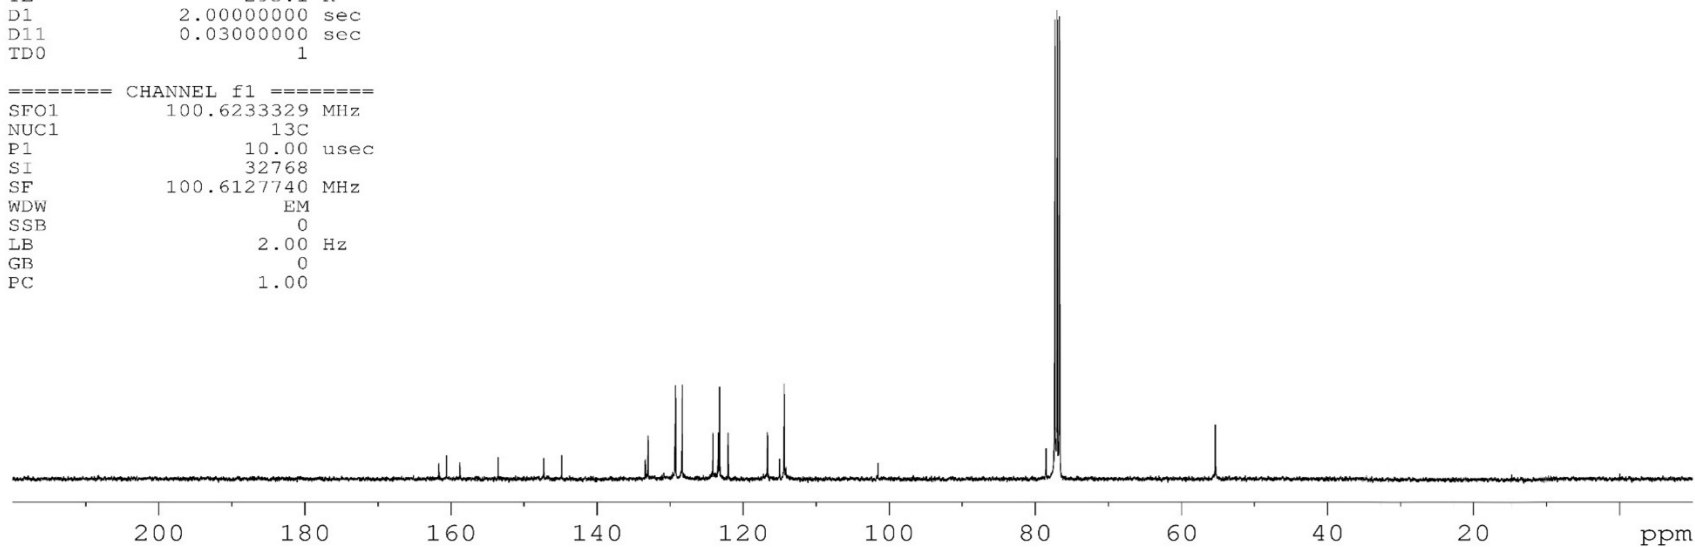

8.374  
7.939  
7.916  
7.893  
7.819  
7.801  
7.761  
7.758  
7.742  
7.738  
7.672  
7.654  
7.636  
7.587  
7.568  
7.550  
7.519  
7.516  
7.511  
7.499  
7.494  
7.481  
7.476  
7.473  
7.404  
7.394  
7.386  
7.378  
7.290  
7.269  
7.260  
7.201  
7.183  
7.164  
6.903  
6.893  
5.878  
5.867

DYY-VS-2-214

NAME DYY-VS-2-214  
EXPNO 1  
PROCNO 1  
Date\_ 20240514  
Time 10.19  
INSTRUM spect  
PROBHD 5 mm PABBO BB/  
PULPROG zg30  
TD 65536  
SOLVENT CDCl3  
NS 16  
DS 0  
SWH 8012.820 Hz  
FIDRES 0.122266 Hz  
AQ 4.0894966 sec  
RG 205.92  
DW 62.400 usec  
DE 16.53 usec  
TE 296.3 K  
D1 2.00000000 sec  
TD0 1

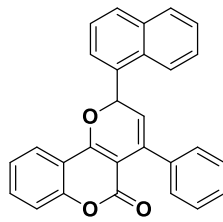

1k

==== CHANNEL f1 =====  
SF01 400.1324008 MHz  
NUC1 1H  
P1 14.00 usec  
SI 16384  
SF 400.1300100 MHz  
WDW EM  
SSB 0  
LB 0.00 Hz  
GB 0  
PC 1.00

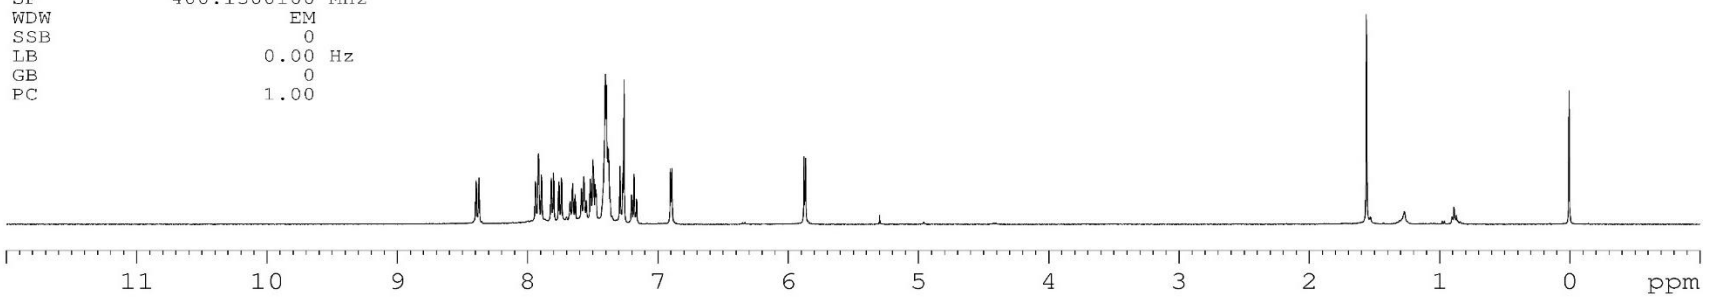

1.000  
2.099  
1.101  
1.081  
1.201  
1.303  
2.151  
5.054  
1.041  
1.043  
0.937  
0.921

161.607  
 158.735  
 153.532  
 137.810  
 135.839  
 134.172  
 132.485  
 132.422  
 131.017  
 130.122  
 129.051  
 127.919  
 127.884  
 127.375  
 126.826  
 126.361  
 126.028  
 125.128  
 123.845  
 123.481  
 123.334  
 119.818  
 116.505  
 115.211  
 102.887  
 77.318  
 77.000  
 76.682  
 76.100

DYY-VS-2-214C

NAME DYY-VS-2-214C  
 EXPNO 1  
 PROCNO 1  
 Date\_ 20240517  
 Time 11.45  
 INSTRUM spect  
 PROBHD 5 mm PABBO BB/  
 PULPROG zgpg30  
 TD 65536  
 SOLVENT CDC13  
 NS 600  
 DS 0  
 SWH 24038.461 Hz  
 FIDRES 0.366798 Hz  
 AQ 1.3631988 sec  
 RG 205.92  
 DW 20.800 usec  
 DE 6.50 usec  
 TE 297.6 K  
 D1 2.00000000 sec  
 D11 0.03000000 sec  
 TD0 1

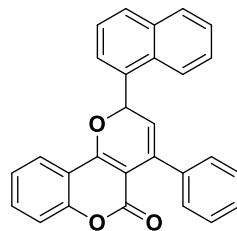

1k

==== CHANNEL f1 =====  
 SFO1 100.6233329 MHz  
 NUC1 13C  
 P1 10.00 usec  
 SI 32768  
 SF 100.6127775 MHz  
 WDW EM  
 SSB 0  
 LB 2.00 Hz  
 GB 0  
 PC 1.00

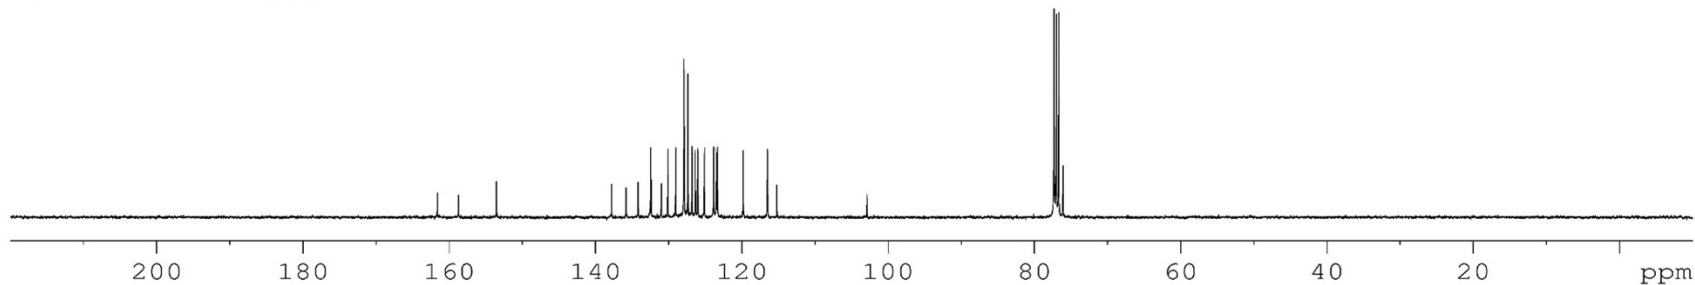

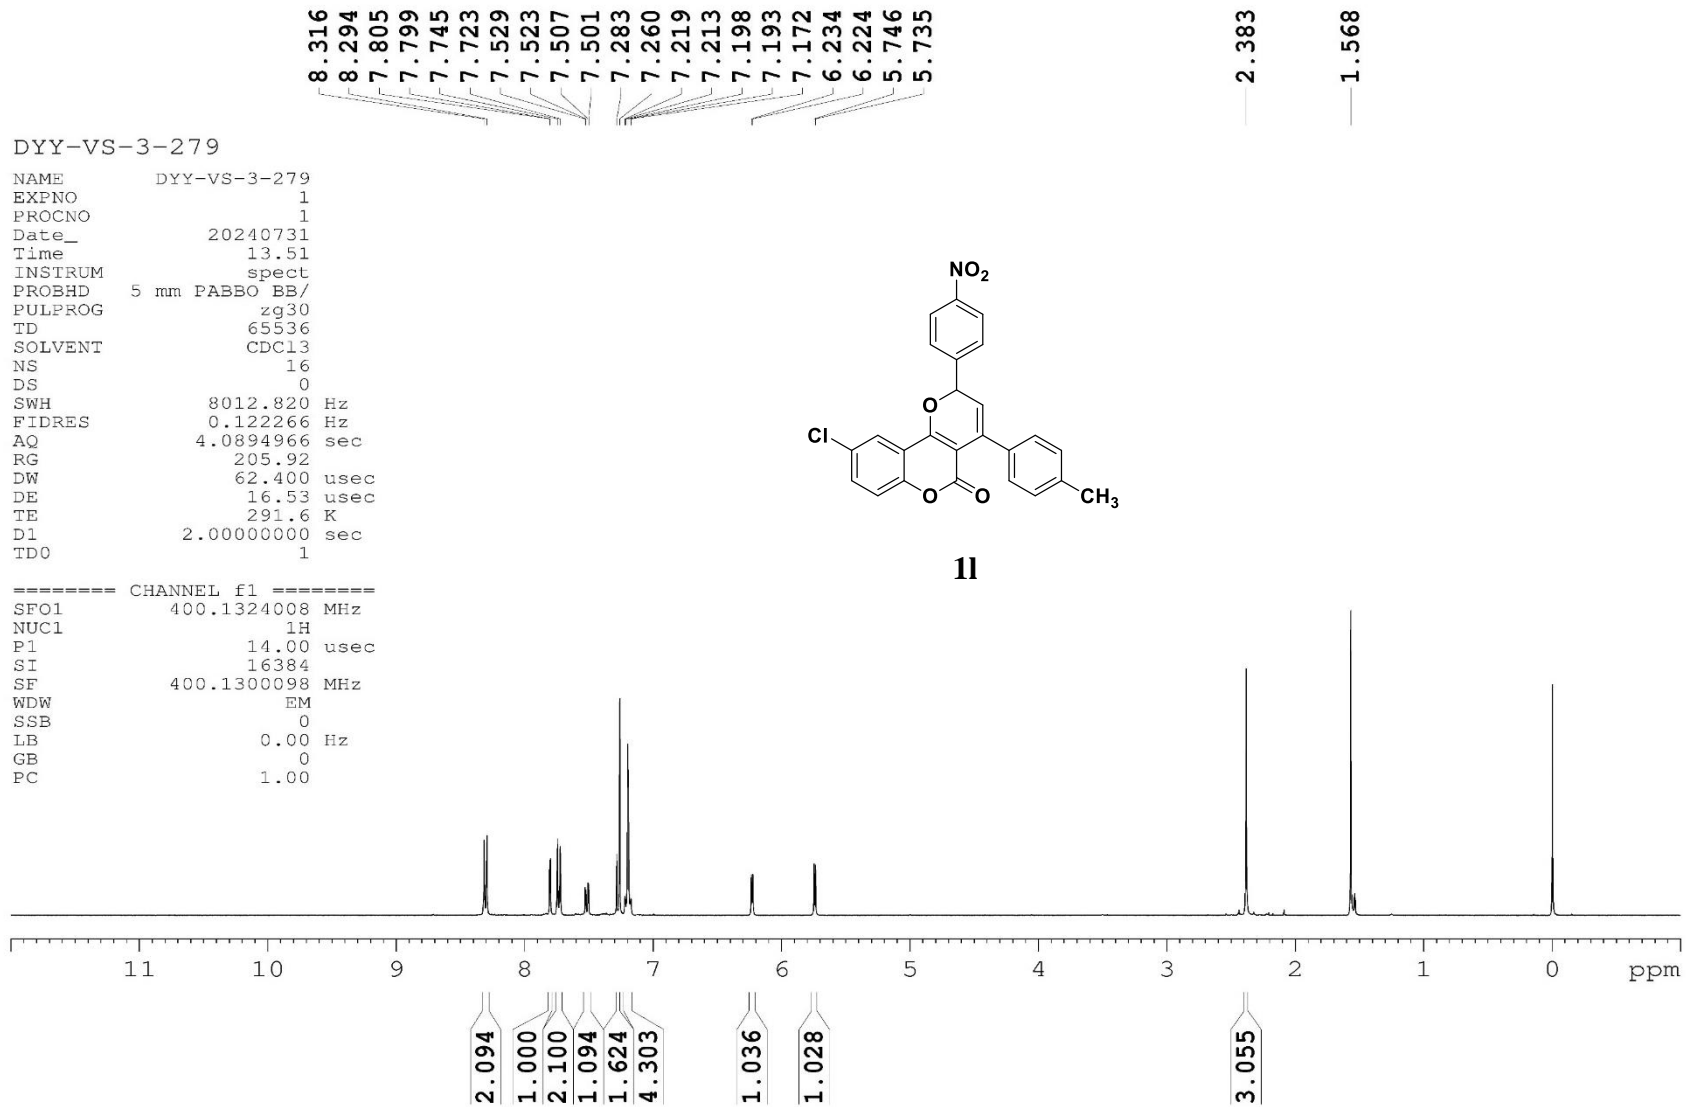

159.757  
157.722  
151.899  
148.360  
144.768  
138.157  
135.821  
134.020  
132.889  
129.715  
128.777  
128.051  
127.194  
124.186  
122.450  
118.799  
118.225  
115.891  
103.799

77.498  
77.317  
77.000  
76.682

21.282

DYY-VS-3-279C

NAME DYY-VS-3-279C  
EXPNO 1  
PROCNO 1  
Date\_ 20240731  
Time 20.29  
INSTRUM spect  
PROBHD 5 mm PABBO BB/  
PULPROG zgpg30  
TD 65536  
SOLVENT CDCl3  
NS 772  
DS 0  
SWH 24038.461 Hz  
FIDRES 0.366798 Hz  
AQ 1.3631988 sec  
RG 205.92  
DW 20.800 usec  
DE 6.50 usec  
TE 296.9 K  
D1 2.00000000 sec  
D11 0.03000000 sec  
TDO 1

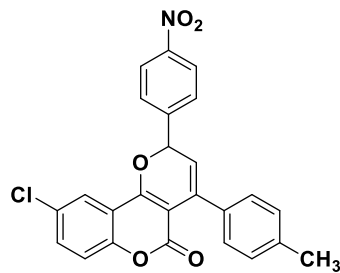

11

77.498  
77.317  
77.000  
76.682

==== CHANNEL f1 =====  
SFO1 100.6233329 MHz  
NUC1 13C  
P1 10.00 usec  
SI 32768  
SF 100.6127746 MHz  
WDW EM  
SSB 0  
LB 2.00 Hz  
GB 0  
PC 1.00

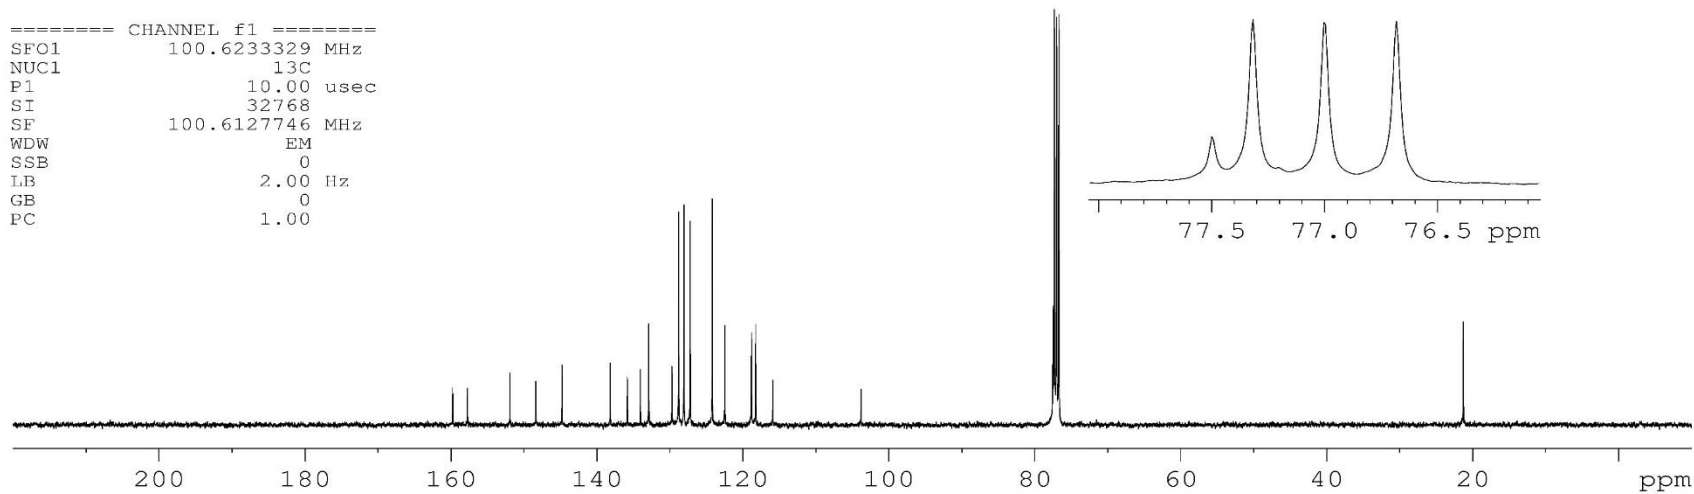



7.928  
7.925  
7.909  
7.906  
7.629  
7.626  
7.608  
7.590  
7.586  
7.406  
7.384  
7.362  
7.344  
7.342  
7.285  
7.260  
7.248  
7.225  
7.216  
7.208  
7.192  
5.524  
5.518  
4.588  
4.582  
4.575  
4.524  
4.519  
3.899  
3.887  
3.875  
3.864  
3.850  
3.561  
3.543  
3.537  
3.532  
3.520  
3.509  
3.181  
3.166  
3.155  
1.559  
1.544  
1.538  
1.531  
1.523  
1.516  
1.508  
1.495

DYY-VS-2-195-1

NAME DYY-VS-2-195-1  
EXPNO 1  
PROCNO 1  
Date\_ 20240423  
Time 10.51  
INSTRUM spect  
PROBHD 5 mm PABBO BB/  
PULPROG zg30  
TD 65536  
SOLVENT CDCl3  
NS 16  
DS 0  
SWH 8012.820 Hz  
FIDRES 0.122266 Hz  
AQ 4.0894966 sec  
RG 205.92  
DW 62.400 usec  
DE 16.53 usec  
TE 296.0 K  
D1 2.00000000 sec  
TD0 1

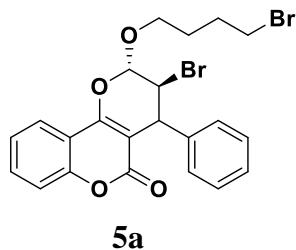

==== CHANNEL f1 =====  
SFO1 400.1324008 MHz  
NUC1 1H  
P1 14.00 usec  
SI 16384  
SF 400.1300101 MHz  
WDW EM  
SSB 0  
LB 0.00 Hz  
GB 0  
PC 1.00

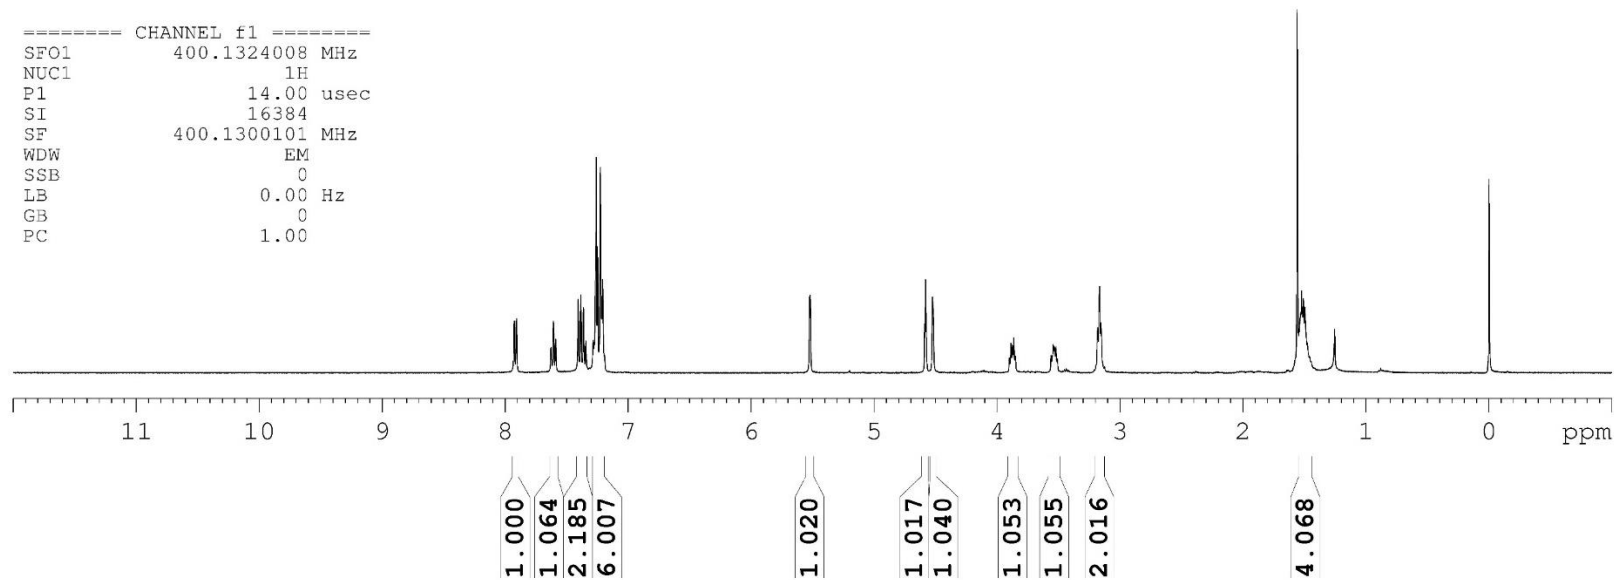

161.411  
 157.211  
 152.933  
 139.584  
 132.233  
 128.239  
 127.793  
 127.064  
 124.121  
 122.692  
 116.826  
 114.972  
 100.976  
 100.779  
 77.317  
 77.000  
 76.682  
 69.216  
 47.326  
 44.029  
 33.112  
 28.811  
 27.830

DYY-VS-2-195C

NAME DYY-VS-2-195C  
 EXPNO 1  
 PROCNO 1  
 Date\_ 20240423  
 Time 11.56  
 INSTRUM spect  
 PROBHD 5 mm PABBO BB/  
 PULPROG zgpg30  
 TD 65536  
 SOLVENT CDC13  
 NS 800  
 DS 0  
 SWH 24038.461 Hz  
 FIDRES 0.366798 Hz  
 AQ 1.3631988 sec  
 RG 205.92  
 DW 20.800 usec  
 DE 6.50 usec  
 TE 297.7 K  
 D1 2.00000000 sec  
 D11 0.03000000 sec  
 TD0 1

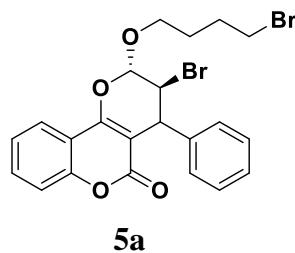

===== CHANNEL f1 =====  
 SFO1 100.6233329 MHz  
 NUC1 13C  
 P1 10.00 usec  
 SI 32768  
 SF 100.6127762 MHz  
 WDW EM  
 SSB 0  
 LB 2.00 Hz  
 GB 0  
 PC 1.00

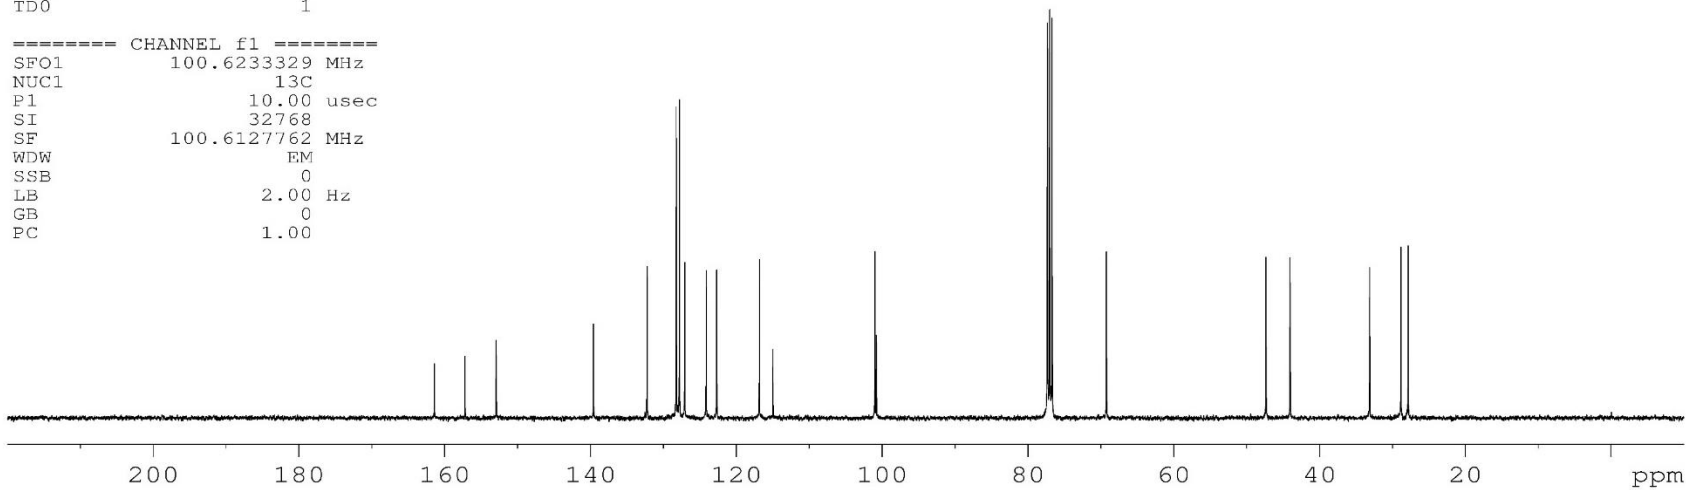

7.806  
7.784  
7.279  
7.260  
7.251  
7.243  
7.222  
7.204  
6.934  
6.928  
6.912  
6.906  
6.871  
6.865  
5.487  
5.481  
4.566  
4.559  
4.553  
4.483  
4.479  
3.894  
3.872  
3.860  
3.848  
3.547  
3.529  
3.523  
3.518  
3.506  
3.184  
3.182  
3.170  
3.159  
1.572  
1.542  
1.526  
1.521  
1.506  
1.494

DYY-VS-2-210

NAME DYY-VS-2-210  
EXPNO 1  
PROCNO 1  
Date\_ 20240507  
Time 10.13  
INSTRUM spect  
PROBHD 5 mm PABBO BB/  
PULPROG zg30  
TD 65536  
SOLVENT CDC13  
NS 16  
DS 0  
SWH 8012.820 Hz  
FIDRES 0.122266 Hz  
AQ 4.0894966 sec  
RG 137.93  
DW 62.400 usec  
DE 16.53 usec  
TE 296.1 K  
D1 2.00000000 sec  
TD0 1

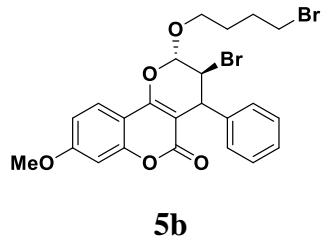

==== CHANNEL f1 =====  
SFO1 400.1324008 MHz  
NUC1 1H  
P1 14.00 usec  
SI 16384  
SF 400.1300100 MHz  
WDW EM  
SSB 0  
LB 0.00 Hz  
GB 0  
PC 1.00

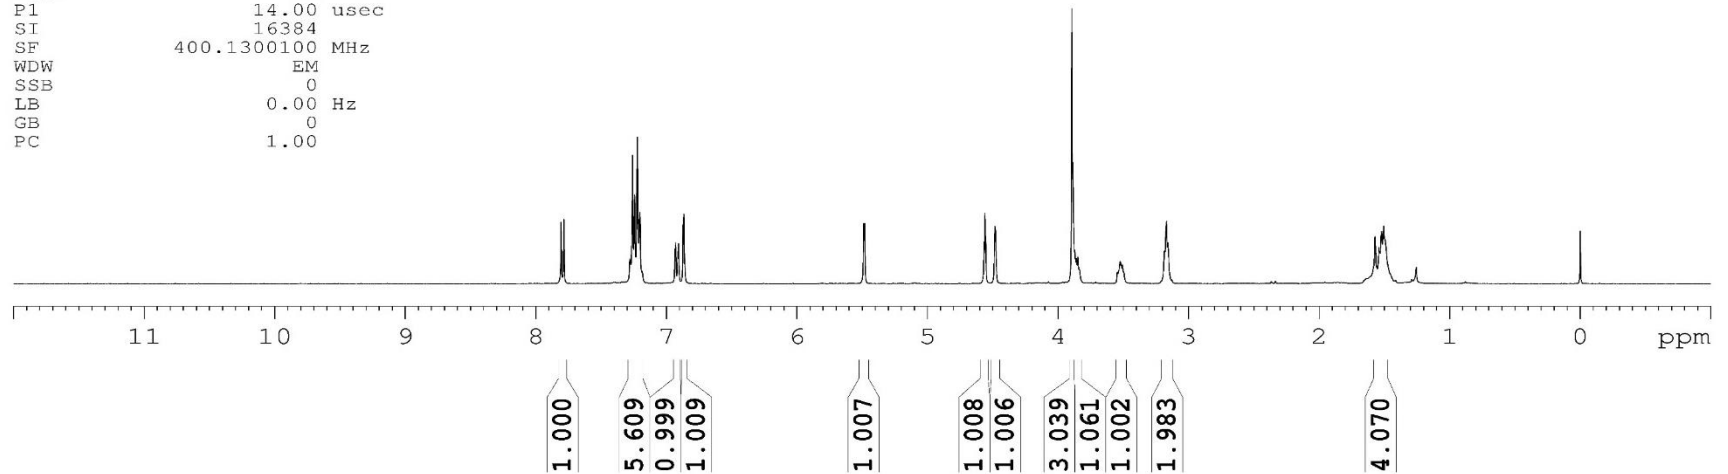

DYY-VS-2-210C

NAME DYY-VS-2-210C  
EXPNO 1  
PROCNO 1  
Date\_ 20240511  
Time 14.48  
INSTRUM spect  
PROBHD 5 mm PABBO BB/  
PULPROG zgpg30  
TD 65536  
SOLVENT CDC13  
NS 442  
DS 0  
SWH 24038.461 Hz  
FIDRES 0.366798 Hz  
AQ 1.3631988 sec  
RG 205.92  
DW 20.800 usec  
DE 6.50 usec  
TE 296.8 K  
D1 2.00000000 sec  
D11 0.03000000 sec  
TD0 1

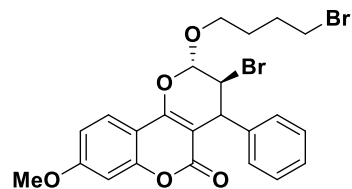

5b

==== CHANNEL f1 =====  
SFO1 100.6233329 MHz  
NUC1 13C  
P1 10.00 usec  
SI 32768  
SF 100.6127850 MHz  
WDW EM  
SSB 0  
LB 2.00 Hz  
GB 0  
PC 1.00

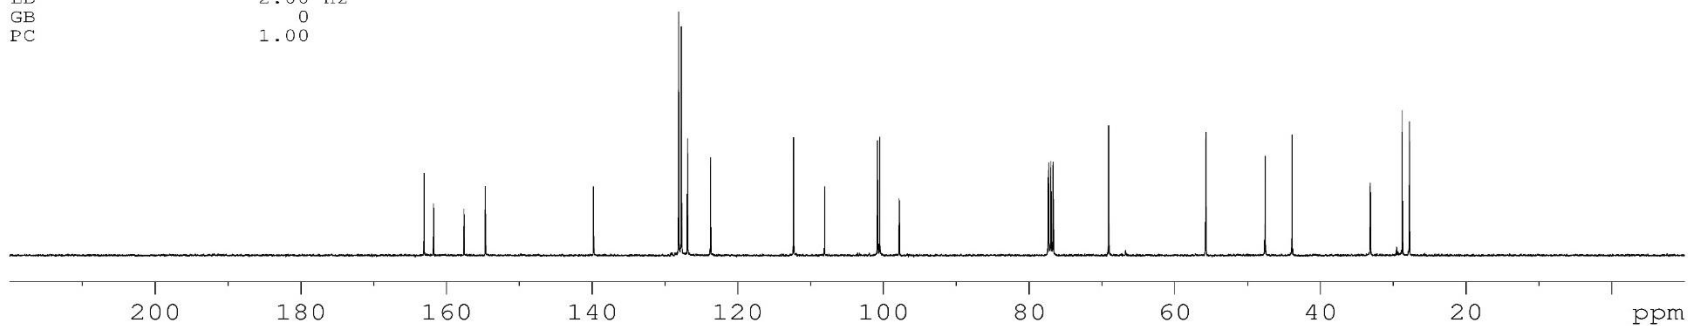

7.885  
7.879  
7.564  
7.558  
7.542  
7.536  
7.351  
7.329  
7.292  
7.288  
7.271  
7.267  
7.260  
7.253  
7.234  
7.231  
7.217  
7.206  
7.202  
7.185  
5.532  
5.527  
4.592  
4.586  
4.580  
4.513  
4.509  
3.903  
3.892  
3.877  
3.869  
3.854  
3.556  
3.545  
3.538  
3.533  
3.527  
3.515  
3.503  
3.176  
3.164  
3.160  
3.149  
3.144  
1.553  
1.540  
1.518  
1.502  
1.492  
1.476

DYY-VS-3-225-I

NAME DYY-VS-3-225-I  
EXPNO 1  
PROCNO 1  
Date\_ 20240723  
Time 10.17  
INSTRUM spect  
PROBHD 5 mm PABBO BB/  
PULPROG zg30  
TD 65536  
SOLVENT CDCl3  
NS 16  
DS 0  
SWH 8012.820 Hz  
FIDRES 0.122266 Hz  
AQ 4.0894966 sec  
RG 205.92  
DW 62.400 usec  
DE 16.53 usec  
TE 291.0 K  
D1 2.00000000 sec  
TD0 1

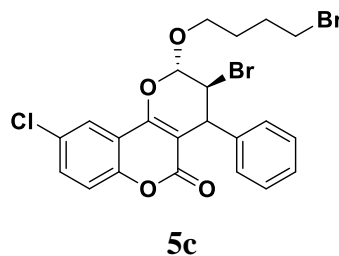

===== CHANNEL f1 =====  
SFO1 400.1324008 MHz  
NUC1 1H  
P1 14.00 usec  
SI 16384  
SF 400.1300100 MHz  
WDW EM  
SSB 0  
LB 0.00 Hz  
GB 0  
PC 1.00

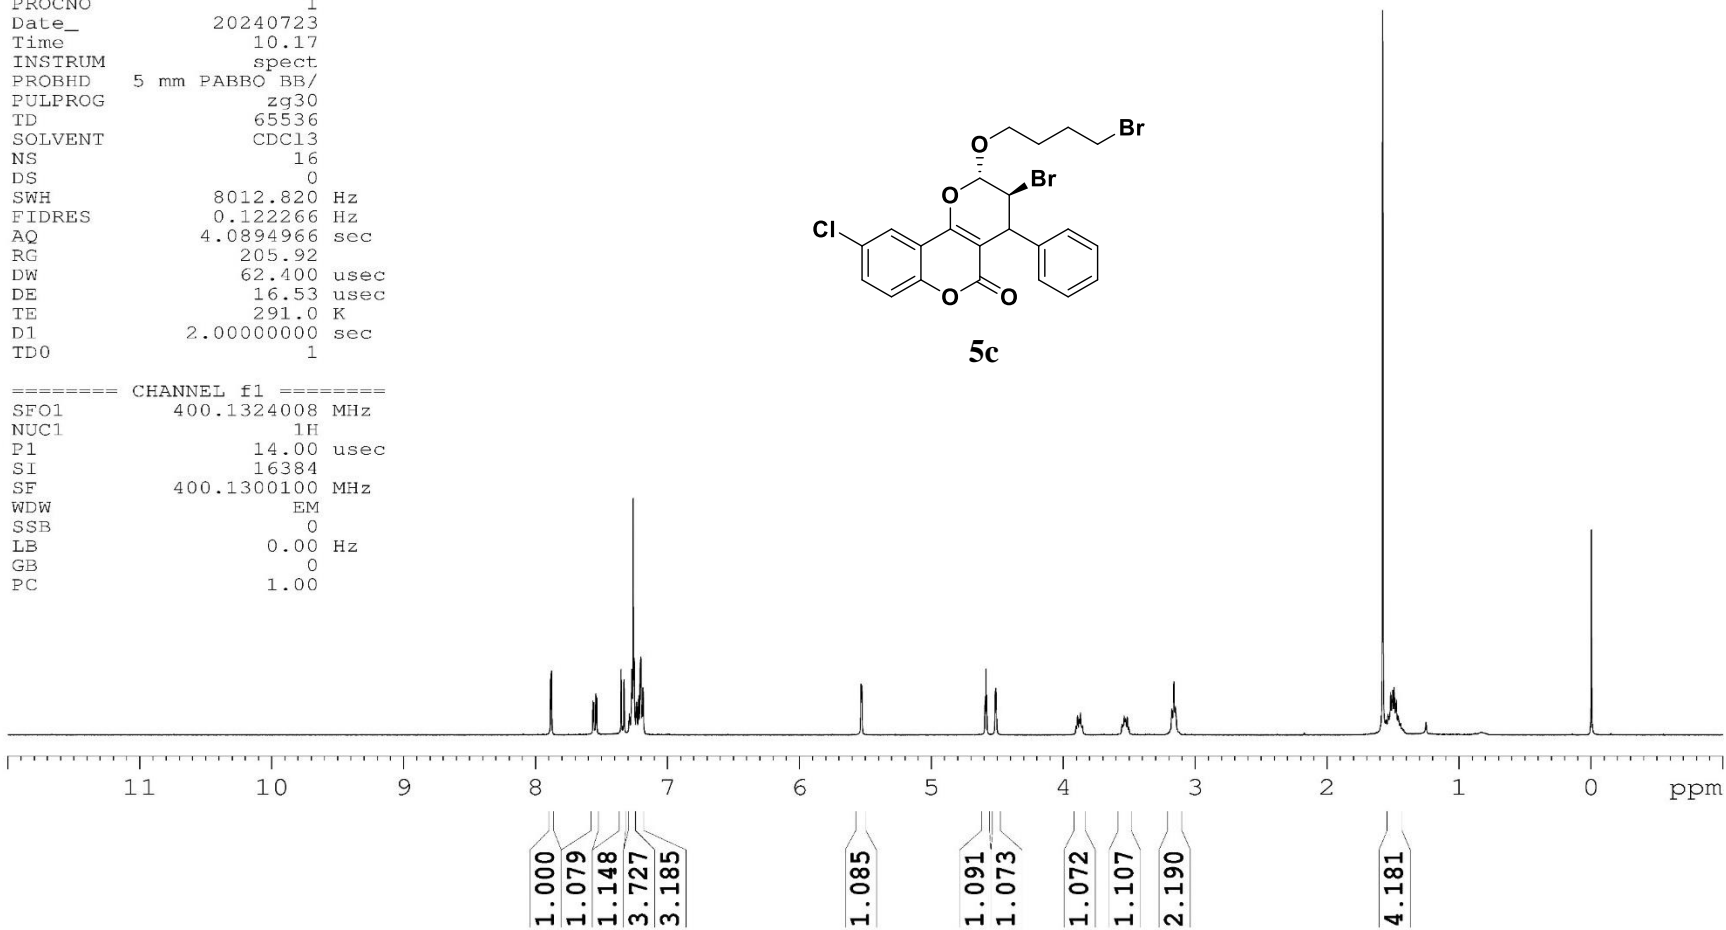

DYY-VS-3-225C

NAME DYY-VS-3-225C  
EXPNO 1  
PROCNO 1  
Date\_ 20240723  
Time 11.12  
INSTRUM spect  
PROBHD 5 mm PABBO BB/  
PULPROG zgpg30  
TD 65536  
SOLVENT CDC13  
NS 900  
DS 0  
SWH 24038.461 Hz  
FIDRES 0.366798 Hz  
AQ 1.3631988 sec  
RG 205.92  
DW 20.800 usec  
DE 6.50 usec  
TE 292.4 K  
D1 2.00000000 sec  
D11 0.03000000 sec  
TD0 1

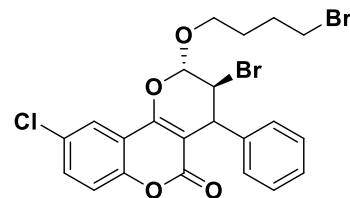

5c

===== CHANNEL f1 =====  
SFO1 100.6233329 MHz  
NUC1 13C  
P1 10.00 usec  
SI 32768  
SF 100.6127770 MHz  
WDW EM  
SSB 0  
LB 2.00 Hz  
GB 0  
PC 1.00

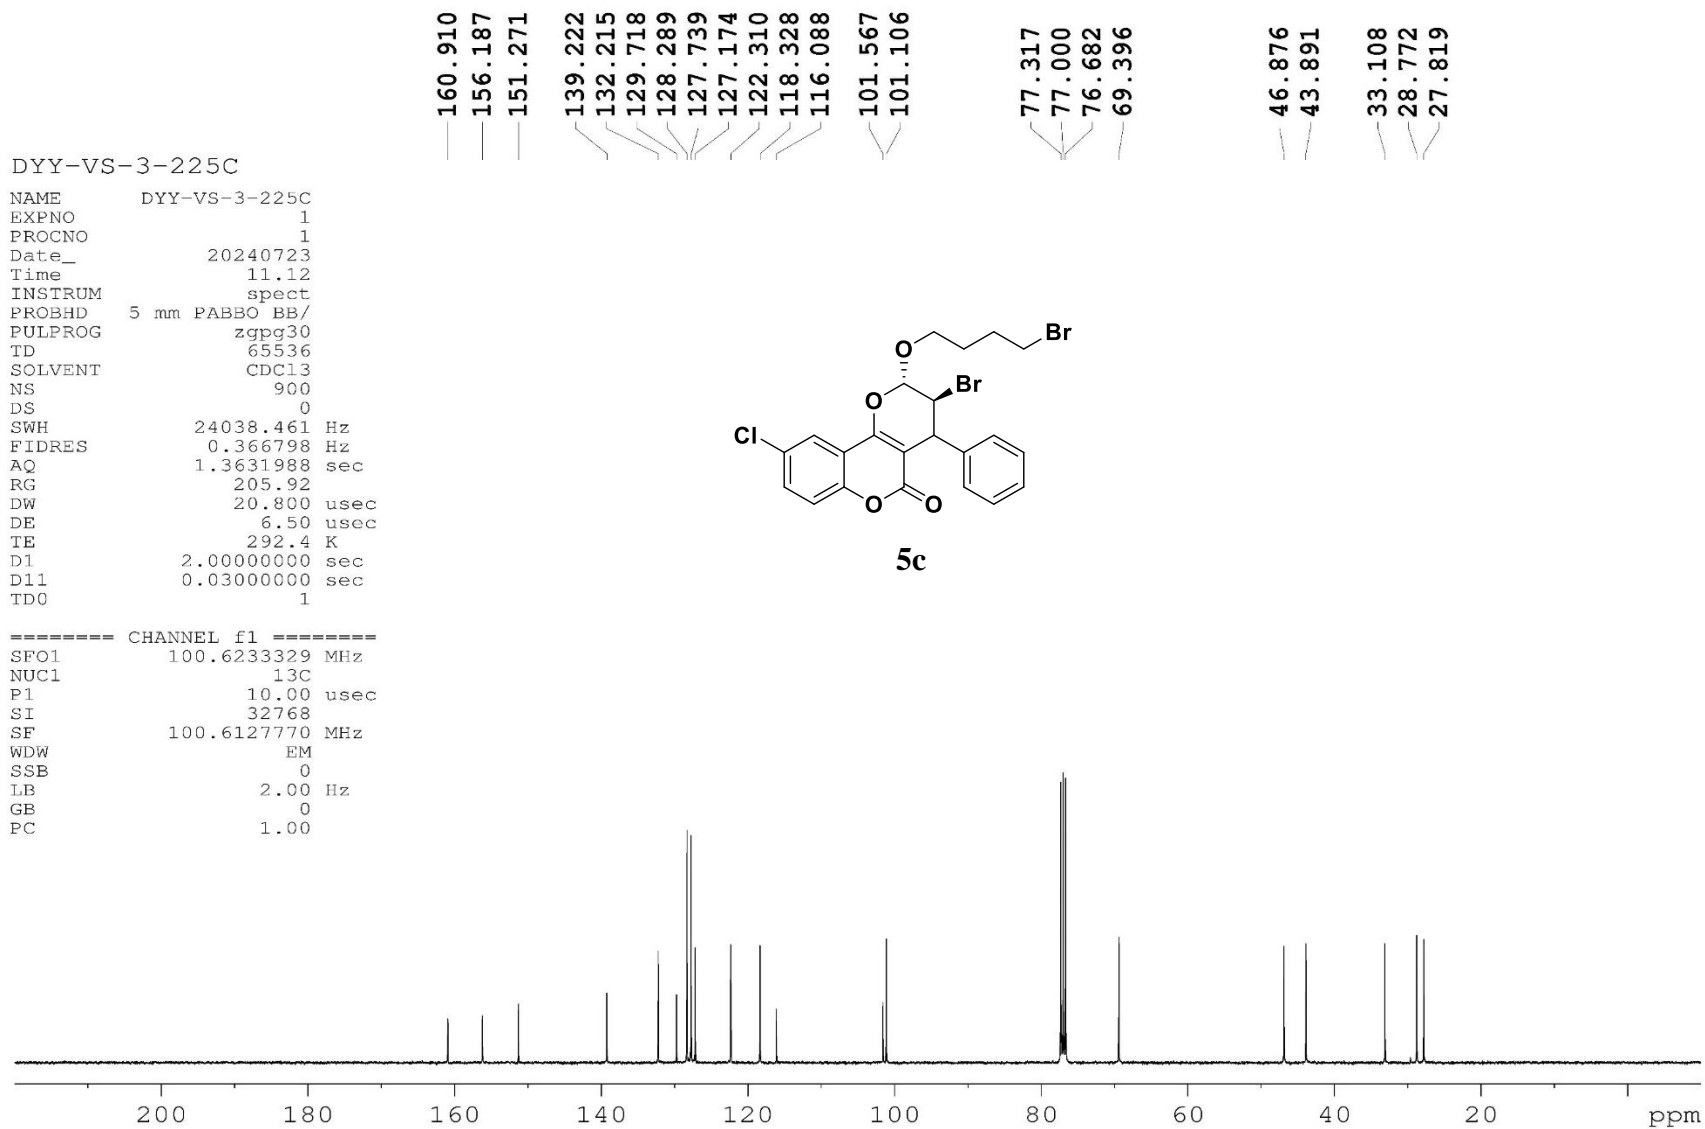

DYY-VS-3-246-1

NAME DYY-VS-3-246-1  
EXPNO 1  
PROCNO 1  
Date\_ 20240628  
Time\_ 10.22  
INSTRUM spect  
PROBHD 5 mm PABBO BB/  
PULPROG zg30  
TD 65536  
SOLVENT CDCl3  
NS 16  
DS 0  
SWH 8012.820 Hz  
FIDRES 0.122266 Hz  
AQ 4.0894966 sec  
RG 205.92  
DW 62.400 usec  
DE 16.53 usec  
TE 291.3 K  
D1 2.0000000 sec  
TD0 1

===== CHANNEL f1 =====  
SFO1 400.1324008 MHz  
NUC1 1H  
P1 14.00 usec  
SI 16384  
SF 400.1300099 MHz  
WDW EM  
SSB 0  
LB 0.00 Hz  
GB 0  
PC 1.00

8.033  
7.275  
7.260  
7.240  
7.217  
7.203  
7.183  
6.980  
5.494  
5.489  
4.572  
4.566  
4.560  
4.482  
4.478  
3.893  
3.882  
3.870  
3.859  
3.844  
3.537  
3.520  
3.508  
3.496  
3.485  
3.176  
3.165  
3.161  
3.150  
3.144  
2.923  
1.533  
1.517  
1.510  
1.501  
1.492  
1.486  
1.474  
1.457

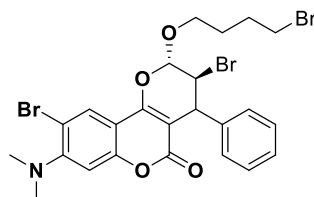

5d

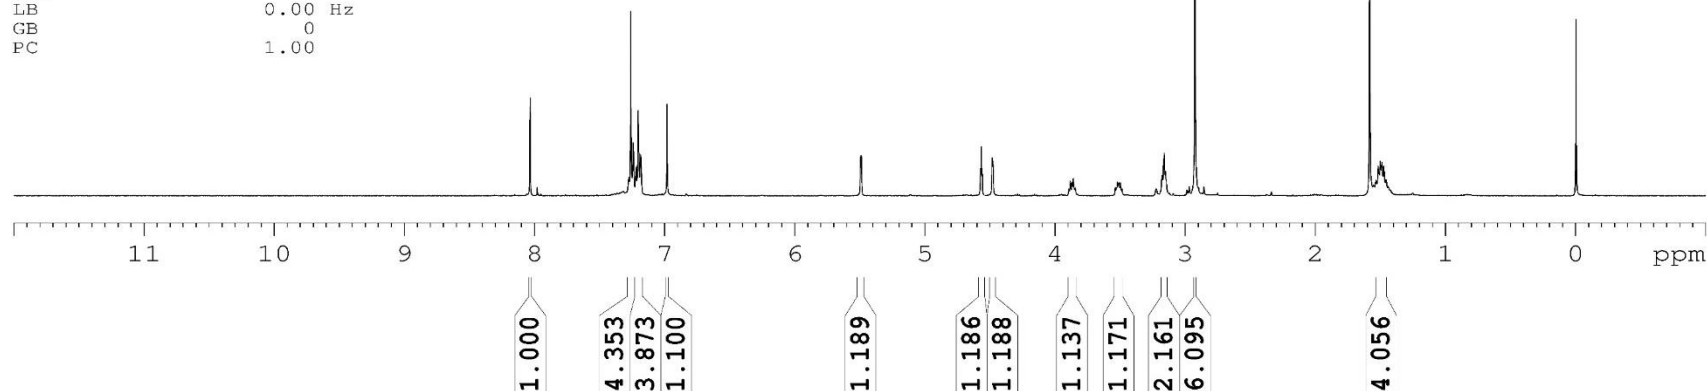

DYY-VS-3-246-1C

NAME DYY-VS-3-246-1C  
EXPNO 1  
PROCNO 1  
Date\_ 20240628  
Time 11.09  
INSTRUM spect  
PROBHD 5 mm PABBO BB/  
PULPROG zgpg30  
TD 65536  
SOLVENT CDC13  
NS 199  
DS 0  
SWH 24038.461 Hz  
FIDRES 0.366798 Hz  
AQ 1.3631988 sec  
RG 205.92  
DW 20.800 usec  
DE 6.50 usec  
TE 292.8 K  
D1 2.00000000 sec  
D11 0.03000000 sec  
TD0 1

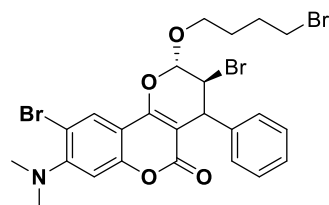

161.571  
156.625  
155.462  
153.168

139.707  
128.301  
127.841  
127.747  
127.119

112.717  
110.018  
107.694  
101.035  
98.850

77.424  
77.106  
76.789  
69.351

47.311  
43.880  
43.793  
33.260  
28.878  
27.919

==== CHANNEL f1 =====  
SFO1 100.6233329 MHz  
NUC1 13C  
P1 10.00 usec  
SI 32768  
SF 100.6127685 MHz  
WDW EM  
SSB 0  
LB 2.00 Hz  
GB 0  
PC 1.00

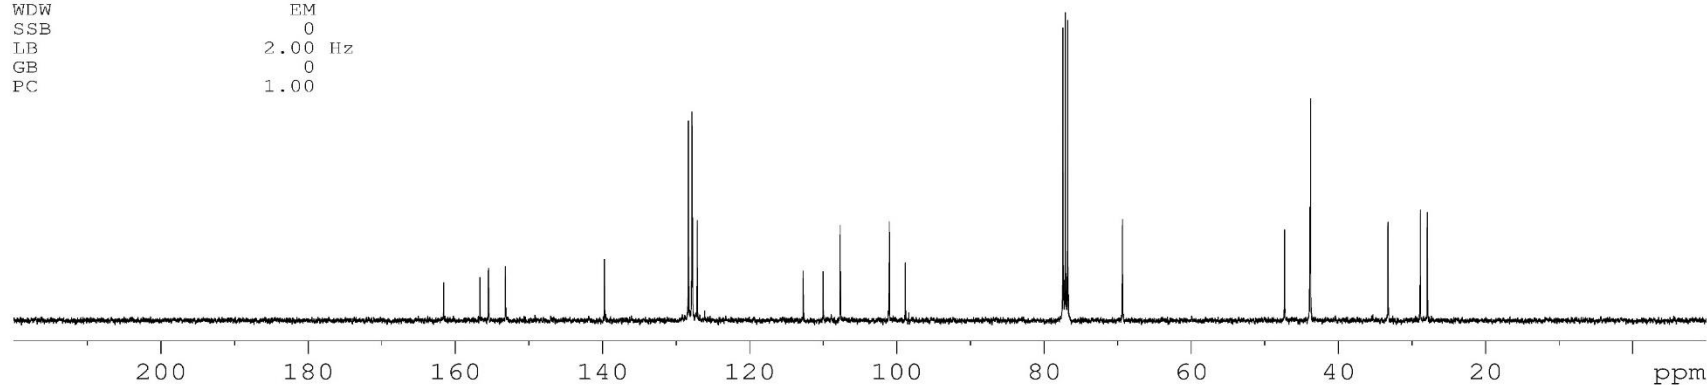



7.926  
7.923  
7.907  
7.904  
7.640  
7.637  
7.619  
7.601  
7.598  
7.410  
7.389  
7.370  
7.351  
7.260  
7.256  
7.234  
7.173  
7.152  
5.527  
5.521  
4.519  
4.513  
4.506  
4.475  
3.904  
3.892  
3.878  
3.869  
3.854  
3.581  
3.563  
3.552  
3.540  
3.529  
3.226  
3.215  
3.211  
3.201  
3.195  
1.582  
1.555  
1.540  
1.525  
1.507  
1.491

DYY-VS-3-254

NAME DYY-VS-3-254  
EXPNO 1  
PROCNO 1  
Date\_ 20240702  
Time 10.20  
INSTRUM spect  
PROBHD 5 mm PABBO BB/  
PULPROG zg30  
TD 65536  
SOLVENT CDCl3  
NS 16  
DS 0  
SWH 8012.820 Hz  
FIDRES 0.122266 Hz  
AQ 4.0894966 sec  
RG 205.92  
DW 62.400 usec  
DE 16.53 usec  
TE 292.5 K  
D1 2.00000000 sec  
TD0 1

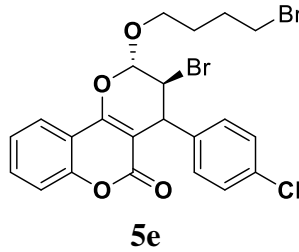

==== CHANNEL f1 =====  
SFO1 400.1324008 MHz  
NUC1 1H  
P1 14.00 usec  
SI 16384  
SF 400.1300100 MHz  
WDW EM  
SSB 0  
LB 0.00 Hz  
GB 0  
PC 1.00

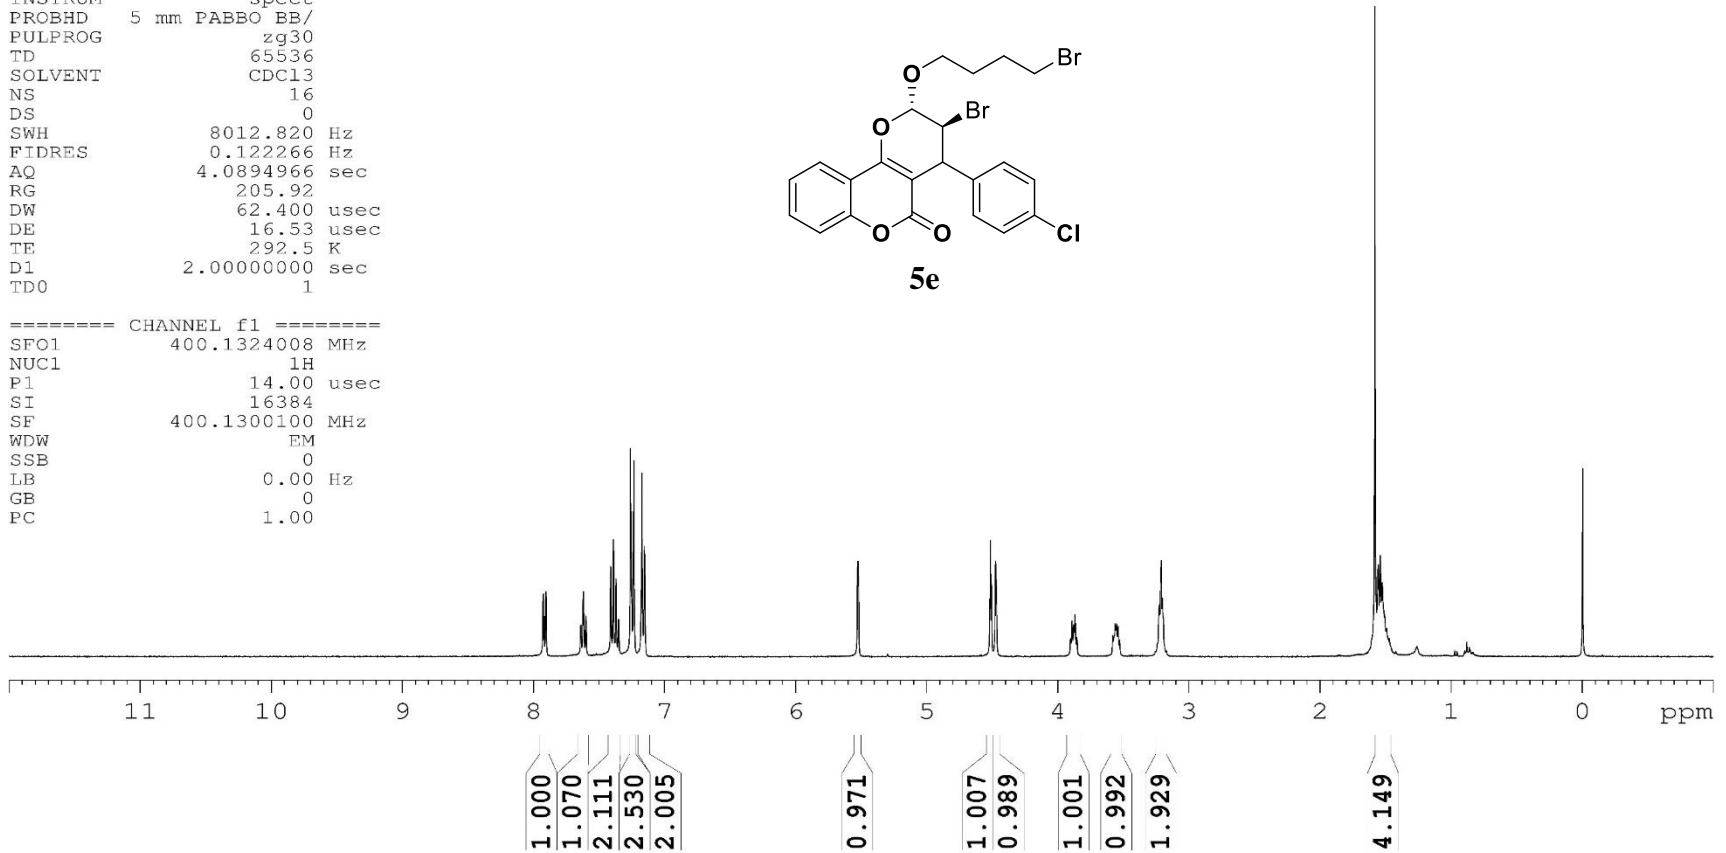

161.393  
 157.408  
 152.941  
 138.234  
 132.834  
 132.447  
 129.241  
 128.411  
 124.245  
 122.740  
 116.894  
 114.846  
 100.882  
 100.290  
 77.317  
 77.000  
 76.682  
 69.430  
 46.762  
 43.455  
 33.024  
 28.866  
 27.857

DYY-VS-3-254C

NAME DYY-VS-3-254C  
 EXPNO 1  
 PROCNO 1  
 Date\_ 20240702  
 Time\_ 10.44  
 INSTRUM spect  
 PROBHD 5 mm PABBO BB/  
 PULPROG zgpg30  
 TD 65536  
 SOLVENT CDC13  
 NS 293  
 DS 0  
 SWH 24038.461 Hz  
 FIDRES 0.366798 Hz  
 AQ 1.3631988 sec  
 RG 205.92  
 DW 20.800 usec  
 DE 6.50 usec  
 TE 294.0 K  
 D1 2.00000000 sec  
 D11 0.03000000 sec  
 TD0 1

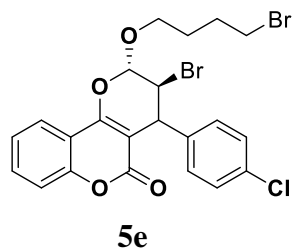

===== CHANNEL f1 =====  
 SFO1 100.6233329 MHz  
 NUC1 13C  
 P1 10.00 usec  
 SI 32768  
 SF 100.6127753 MHz  
 WDW EM  
 SSB 0  
 LB 2.00 Hz  
 GB 0  
 PC 1.00

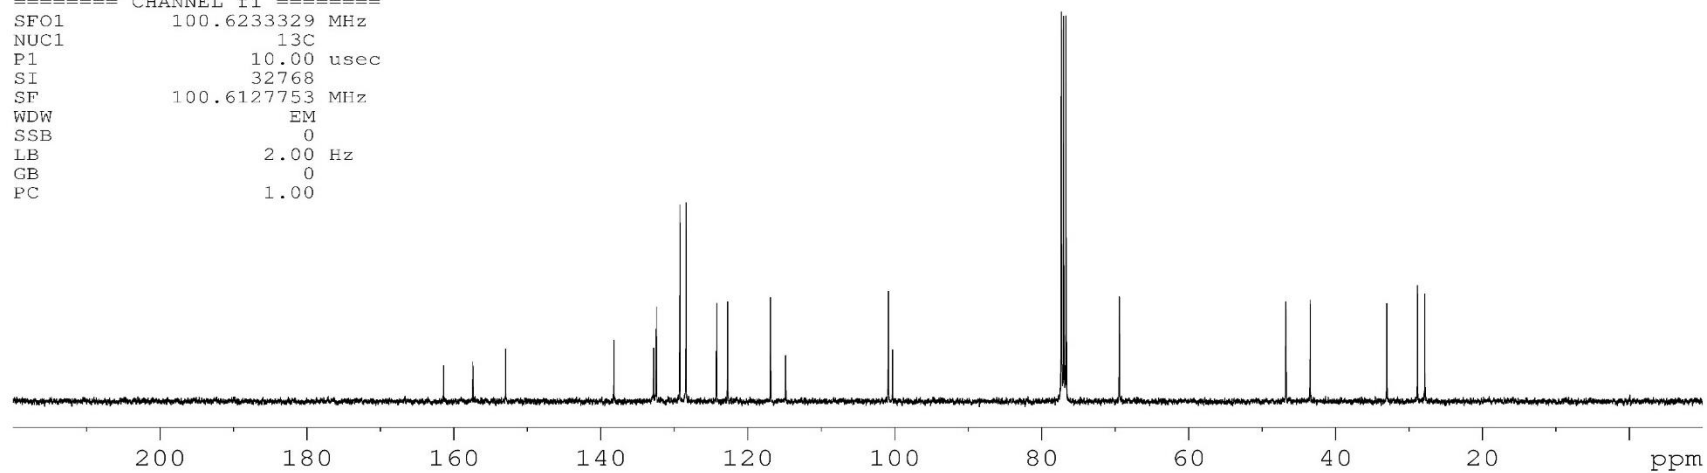

7.919  
7.902  
7.622  
7.620  
7.601  
7.583  
7.580  
7.402  
7.380  
7.358  
7.339  
7.260  
7.112  
7.092  
7.077  
7.057  
5.517  
5.511  
4.555  
4.549  
4.542  
4.480  
3.908  
3.895  
3.884  
3.873  
3.859  
3.567  
3.550  
3.544  
3.527  
3.516  
3.183  
3.173  
3.168  
3.159  
2.297  
1.582  
1.562  
1.546  
1.540  
1.534  
1.526  
1.513

DYY-VS-3-264

NAME DYY-VS-3-264  
EXPNO 1  
PROCNO 1  
Date\_ 20240712  
Time 10.28  
INSTRUM spect  
PROBHD 5 mm PABBO BB/  
PULPROG zg30  
TD 65536  
SOLVENT CDCl3  
NS 16  
DS 0  
SWH 8012.820 Hz  
FIDRES 0.122266 Hz  
AQ 4.0894966 sec  
RG 205.92  
DW 62.400 usec  
DE 16.53 usec  
TE 291.6 K  
D1 2.00000000 sec  
TD0 1

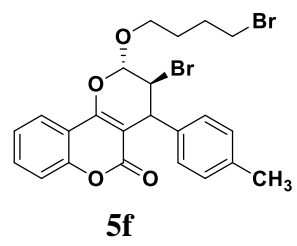

===== CHANNEL f1 =====  
SFO1 400.1324008 MHz  
NUC1 1H  
P1 14.00 usec  
SI 16384  
SF 400.1300101 MHz  
WDW EM  
SSB 0  
LB 0.00 Hz  
GB 0  
PC 1.00

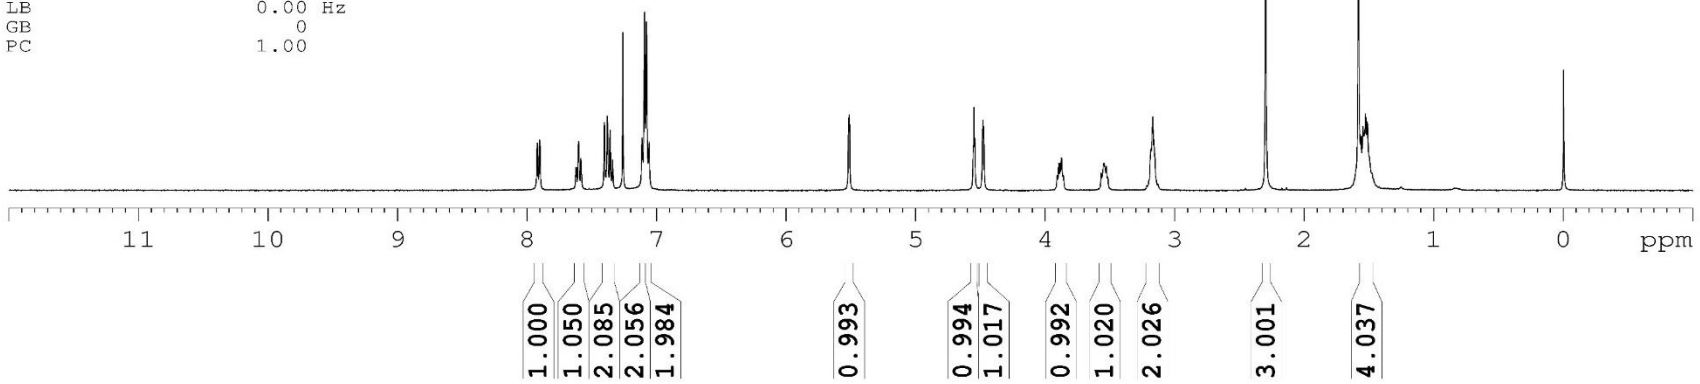

DYY-VS-3-264C

NAME DYY-VS-3-264C  
EXPNO 1  
PROCNO 1  
Date\_ 20240712  
Time 11.30  
INSTRUM spect  
PROBHD 5 mm PABBO BB/  
PULPROG zgpgg30  
TD 65536  
SOLVENT CDC13  
NS 204  
DS 0  
SWH 24038.461 Hz  
FIDRES 0.366798 Hz  
AQ 1.3631988 sec  
RG 205.92  
DW 20.800 usec  
DE 6.50 usec  
TE 293.1 K  
D1 2.00000000 sec  
D11 0.03000000 sec  
TD0 1

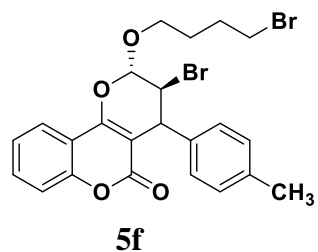

===== CHANNEL f1 =====  
SFO1 100.6233329 MHz  
NUC1 13C  
P1 10.00 usec  
SI 32768  
SF 100.6127769 MHz  
WDW EM  
SSB 0  
LB 2.00 Hz  
GB 0  
PC 1.00

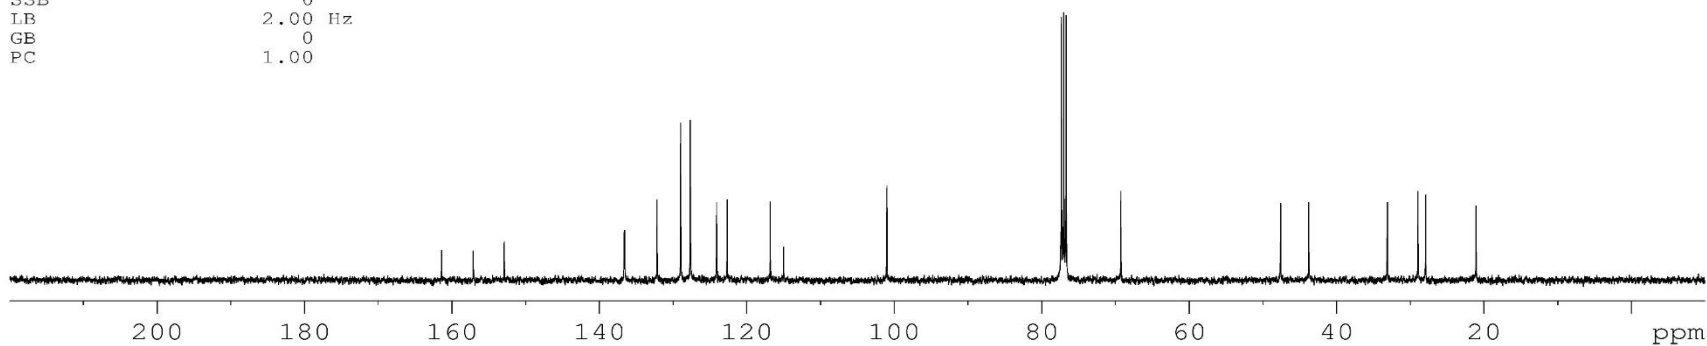

8.148  
8.126  
7.987  
7.985  
7.968  
7.965  
7.927  
7.907  
7.766  
7.746  
7.673  
7.656  
7.635  
7.617  
7.614  
7.554  
7.535  
7.516  
7.442  
7.421  
7.415  
7.395  
7.377  
7.308  
7.289  
7.269  
7.260  
7.202  
7.184  
5.558  
5.201  
4.732  
3.845  
3.833  
3.822  
3.809  
3.447  
3.433  
3.410  
3.113  
3.098  
3.083  
1.474  
1.457  
1.426  
1.413  
1.399  
1.358

DYY-VS-3-243

NAME DYY-VS-3-243  
EXPNO 1  
PROCNO 1  
Date\_ 20240618  
Time 10.11  
INSIRUM spect  
PROBHD 5 mm PABBO BB/  
PULPROG zg30  
TD 65536  
SOLVENT CDCl3  
NS 16  
DS 0  
SWH 8012.820 Hz  
FIDRES 0.122266 Hz  
AQ 4.0894966 sec  
RG 163.06  
DW 62.400 usec  
DE 16.53 usec  
TE 291.8 K  
D1 2.00000000 sec  
TD0 1

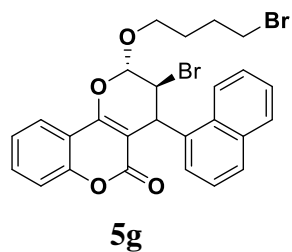

==== CHANNEL f1 =====  
SFO1 400.1324008 MHz  
NUC1 1H  
P1 14.00 usec  
SI 16384  
SF 400.1300098 MHz  
WDW EM  
SSB 0  
LB 0.00 Hz  
GB 0  
PC 1.00

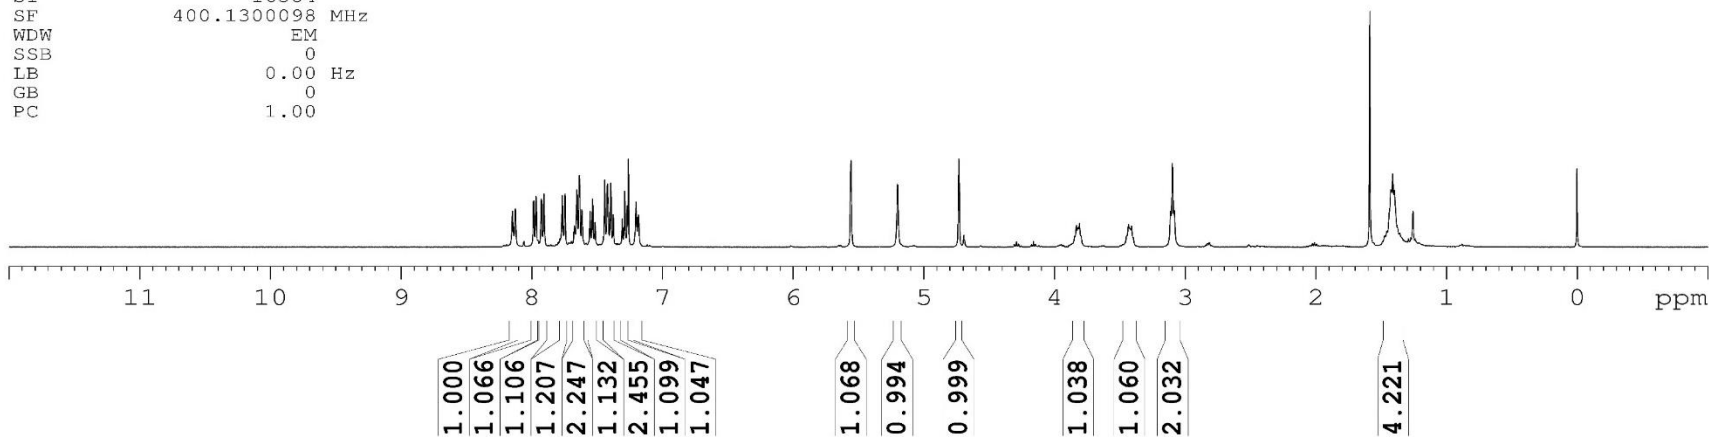

DYY-VS-243C

NAME DYY-VS-3-243C  
EXPNO 1  
PROCNO 1  
Date\_ 20240618  
Time 11.40  
INSTRUM spect  
PROBHD 5 mm PABBO BB/  
PULPROG zgpg30  
TD 65536  
SOLVENT CDC13  
NS 600  
DS 0  
SWH 24038.461 Hz  
FIDRES 0.366798 Hz  
AQ 1.3631988 sec  
RG 205.92  
DW 20.800 usec  
DE 6.50 usec  
TE 293.5 K  
D1 2.00000000 sec  
D11 0.03000000 sec  
TD0 1

==== CHANNEL f1 =====  
SFO1 100.6233329 MHz  
NUC1 13C  
P1 10.00 usec  
SI 32768  
SF 100.6127746 MHz  
WDW EM  
SSB 0  
LB 2.00 Hz  
GB 0  
PC 1.00

161.536  
157.469  
152.963  
134.572  
134.167  
132.285  
130.875  
129.520  
128.149  
126.795  
125.512  
124.863  
124.196  
122.709  
122.388  
116.900  
115.069  
100.679  
100.404

77.317  
77.000  
76.682  
69.172

45.136  
40.486  
33.033  
28.786  
27.839

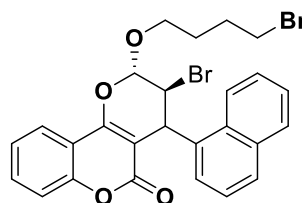

5g

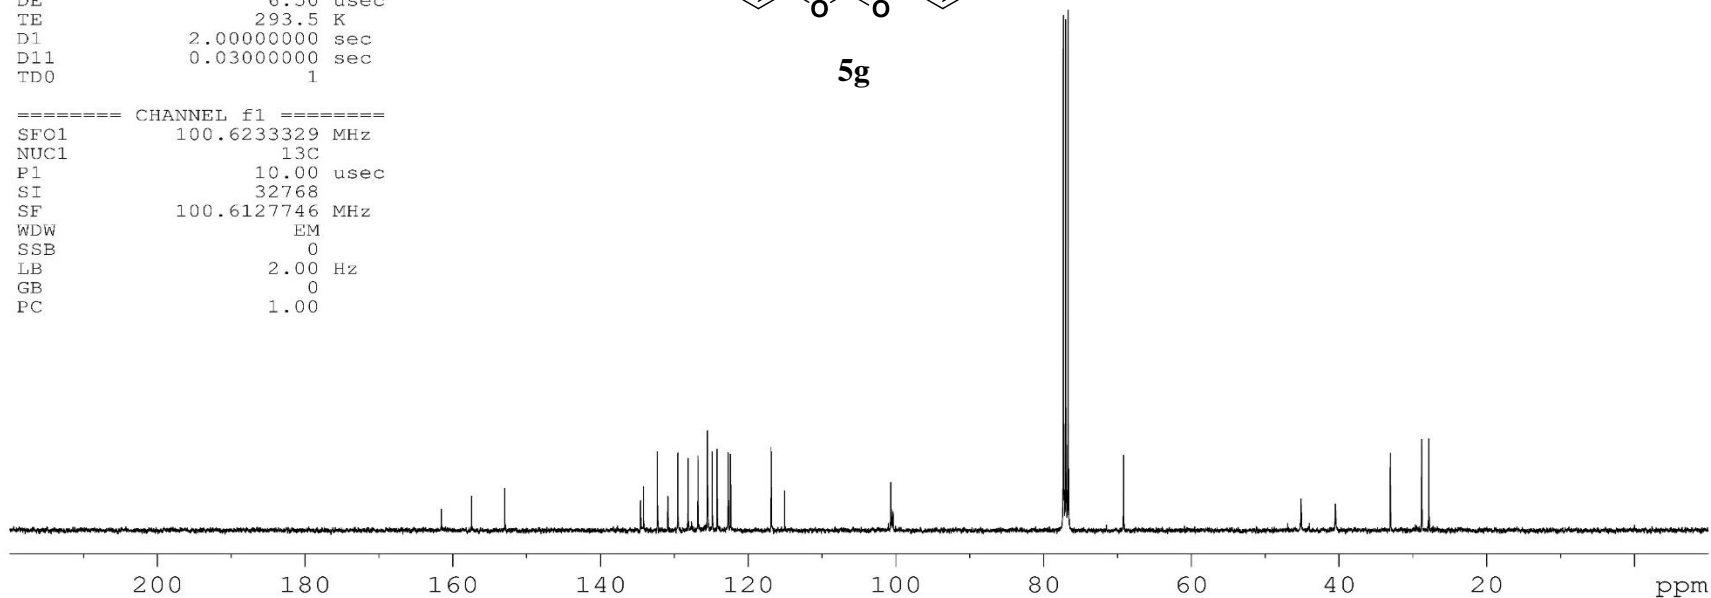

8.163  
8.141  
7.945  
7.942  
7.925  
7.922  
7.670  
7.667  
7.649  
7.631  
7.628  
7.427  
7.406  
7.394  
7.375  
7.374  
7.260  
5.551  
5.545  
4.574  
4.569  
4.538  
4.532  
4.525  
3.909  
3.896  
3.885  
3.882  
3.873  
3.858  
3.606  
3.589  
3.582  
3.576  
3.570  
3.565  
3.552  
3.193  
3.177  
3.162  
1.592  
1.558  
1.551  
1.535  
1.528  
1.519  
1.512  
1.503  
1.496

DYY-VS-3-236

NAME DYY-VS-3-236  
EXPNO 1  
PROCNO 1  
Date\_ 20240614  
Time 10.08  
INSTRUM spect  
PROBHD 5 mm PABBO BB/  
PULPROG zg30  
TD 65536  
SOLVENT CDC13  
NS 16  
DS 0  
SWH 8012.820 Hz  
FIDRES 0.122266 Hz  
AQ 4.0894966 sec  
RG 205.92  
DW 62.400 usec  
DE 16.53 usec  
TE 291.8 K  
D1 2.00000000 sec  
TD0 1

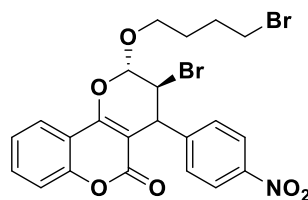

5h

----- CHANNEL f1 -----  
SFO1 400.1324008 MHz  
NUC1 1H  
P1 14.00 usec  
SI 16384  
SF 400.1300098 MHz  
WDW EM  
SSB 0  
LB 0.00 Hz  
GB 0  
PC 1.00

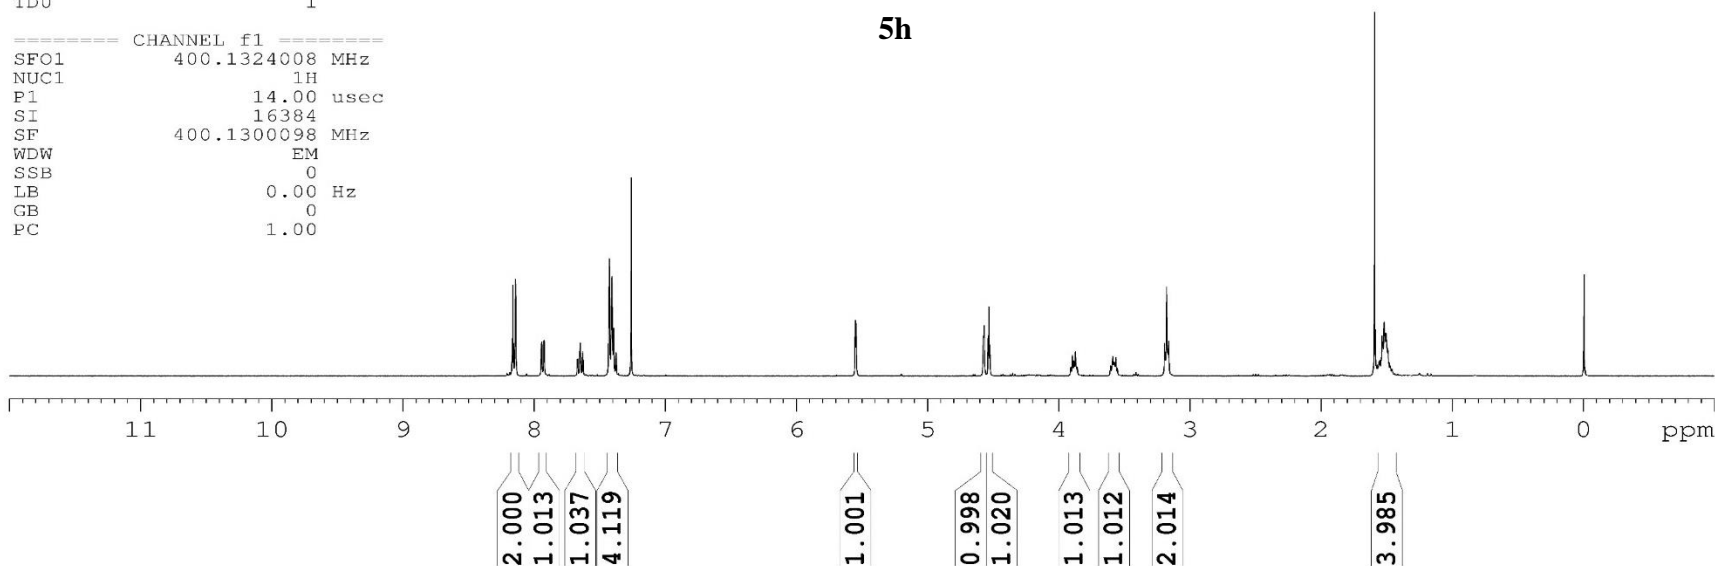

161.343  
 157.779  
 152.933  
 147.175  
 146.855  
 132.746  
 128.839  
 124.403  
 123.501  
 122.788  
 116.911  
 114.618  
 100.636  
 99.408  
 77.318  
 77.000  
 76.682  
 69.570  
 45.724  
 43.779  
 32.666  
 28.825  
 27.773

DYY-VS-3-236C

NAME DYY-VS-3-236C  
 EXPNO 1  
 PROCNO 1  
 Date\_ 20240614  
 Time 11.17  
 INSTRUM spect  
 PROBHD 5 mm PABBO BB/  
 PULPROG zgpg30  
 TD 65536  
 SOLVENT CDCl3  
 NS 135  
 DS 0  
 SWH 24038.461 Hz  
 FIDRES 0.366798 Hz  
 AQ 1.3631988 sec  
 RG 205.92  
 DW 20.800 usec  
 DE 6.50 usec  
 TE 292.3 K  
 D1 2.00000000 sec  
 D11 0.03000000 sec  
 TD0 1

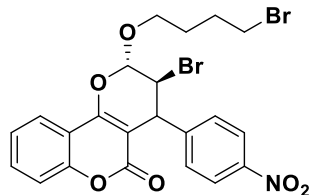

5h

===== CHANNEL f1 =====  
 SF01 100.6233329 MHz  
 NUC1 13C  
 P1 10.00 usec  
 SI 32768  
 SF 100.6127803 MHz  
 WDW EM  
 SSB 0  
 LB 2.00 Hz  
 GB 0  
 PC 1.00

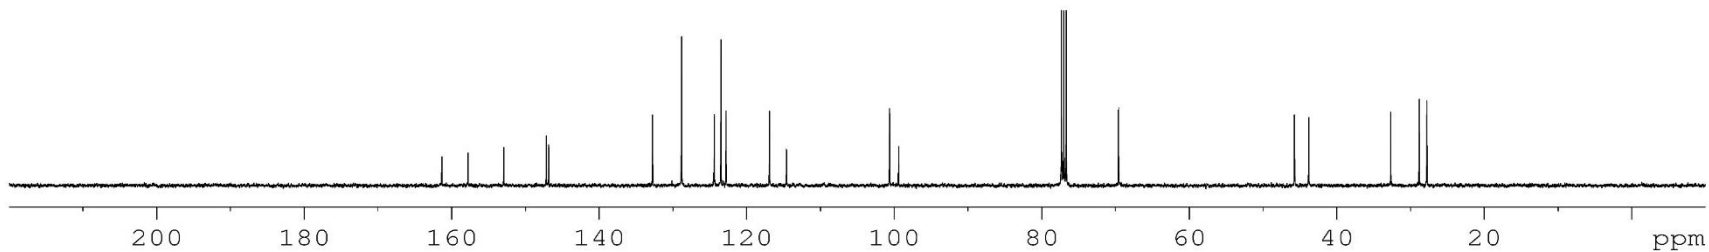



DYY-VS-3-278

NAME DYY-VS-3-278  
EXPNO 1  
PROCNO 1  
Date\_ 20240731  
Time 13.46  
INSIRUM spect  
PROBHD 5 mm PABBO BB/  
PULPROG zg30  
TD 65536  
SOLVENT CDCl3  
NS 16  
DS 0  
SWH 8012.820 Hz  
FIDRES 0.122266 Hz  
AQ 4.0894966 sec  
RG 205.92  
DW 62.400 usec  
DE 16.53 usec  
TE 291.6 K  
D1 2.00000000 sec  
TD0 1

===== CHANNEL f1 =====  
SFO1 400.1324008 MHz  
NUC1 1H  
P1 14.00 usec  
SI 16384  
SF 400.1300100 MHz  
WDW EM  
SSB 0  
LB 0.00 Hz  
GB 0  
PC 1.00

7.878  
7.872  
7.556  
7.550  
7.534  
7.528  
7.345  
7.322  
7.260  
7.076  
5.524  
5.519  
4.559  
4.553  
4.546  
4.471  
3.912  
3.901  
3.889  
3.878  
3.864  
3.565  
3.547  
3.536  
3.524  
3.513  
3.180  
3.169  
3.165  
3.155  
2.299  
1.563  
1.549  
1.533  
1.519  
1.502  
1.484

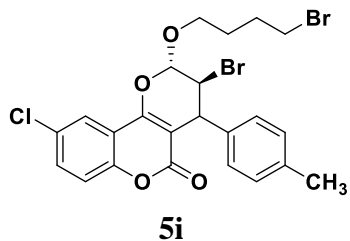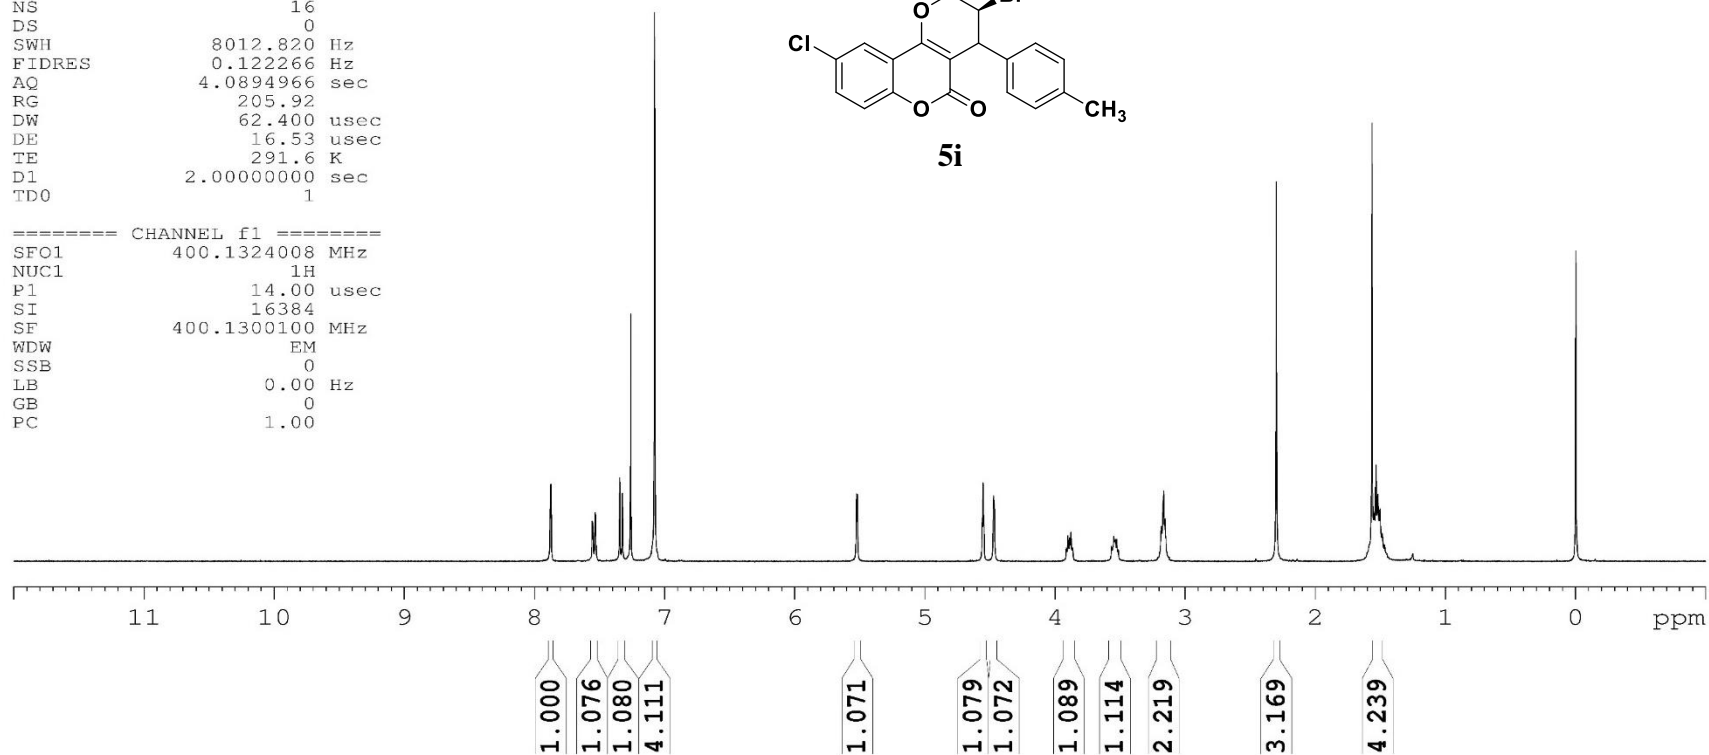

160.896  
 156.097  
 151.316  
 136.840  
 136.269  
 132.174  
 129.726  
 129.048  
 127.659  
 122.325  
 118.350  
 116.178  
 101.925  
 101.225  
 77.317  
 77.000  
 76.682  
 69.489  
 47.219  
 43.750  
 33.049  
 28.976  
 27.955  
 21.087

DYY-VS-3-278C

NAME DYY-VS-3-278C  
 EXPNO 1  
 PROCNO 1  
 Date\_ 20240731  
 Time\_ 19.42  
 INSTRUM spect  
 PROBHD 5 mm PABBO BB/  
 PULPROG zgpg30  
 ID 65536  
 SOLVENT CDC13  
 NS 200  
 DS 0  
 SWH 24038.461 Hz  
 FIDRES 0.366798 Hz  
 AQ 1.3631988 sec  
 RG 205.92  
 DW 20.800 usec  
 DE 6.50 usec  
 TE 296.8 K  
 D1 2.00000000 sec  
 D11 0.03000000 sec  
 TD0 1

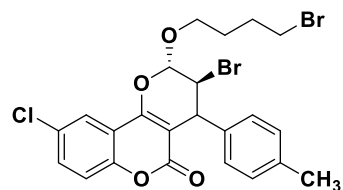

5i

===== CHANNEL f1 =====  
 SFO1 100.6233329 MHz  
 NUC1 13C  
 P1 10.00 usec  
 SI 32768  
 SF 100.6127719 MHz  
 WDW EM  
 SSB 0  
 LB 2.00 Hz  
 GB 0  
 PC 1.00

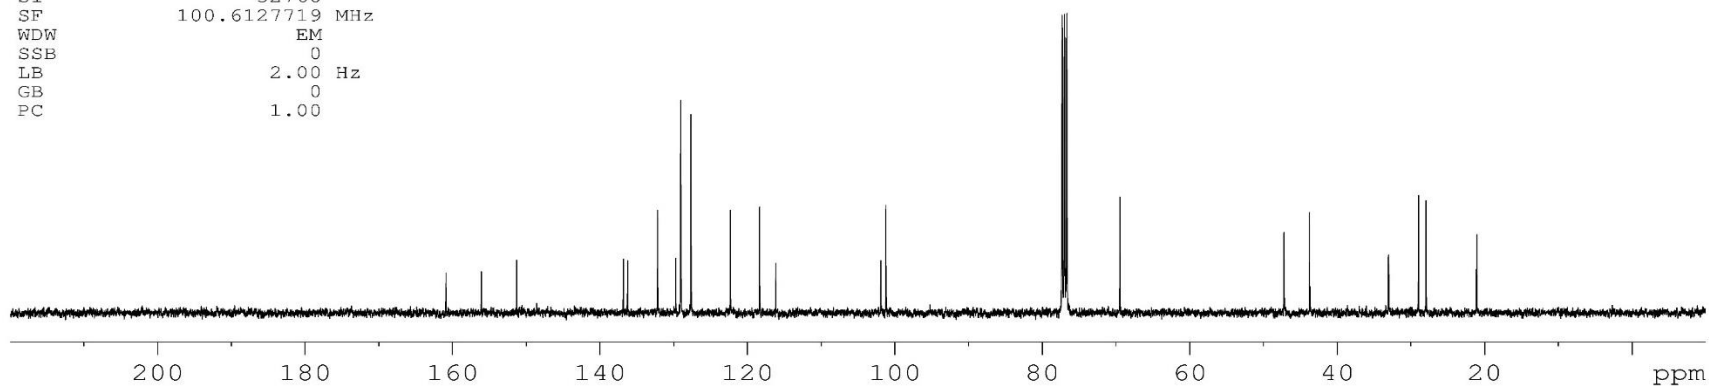

7.934  
7.914  
7.621  
7.603  
7.583  
7.401  
7.380  
7.361  
7.342  
7.282  
7.260  
7.252  
7.245  
7.229  
7.212  
7.201  
5.524  
5.521  
4.596  
4.591  
4.585  
4.524  
3.876  
3.866  
3.852  
3.829  
3.579  
3.572  
3.554  
3.540  
3.528  
3.522  
3.517  
3.510  
3.487  
1.616  
1.609  
1.597  
1.578  
1.559  
1.540  
1.523  
1.485  
1.476  
1.455  
1.442

DYY-VS-2-196-2

NAME DYY-VS-2-196-2  
EXPNO 1  
PROCNO 1  
Date\_ 20240611  
Time 12.35  
INSTRUM spect  
PROBHD 5 mm PABBO BB/  
PULPROG zg30  
TD 65536  
SOLVENT CDCl3  
NS 16  
DS 0  
SWH 8012.820 Hz  
FIDRES 0.122266 Hz  
AQ 4.0894966 sec  
RG 91.1  
DW 62.400 usec  
DE 16.53 usec  
TE 295.9 K  
D1 2.00000000 sec  
TD0 1

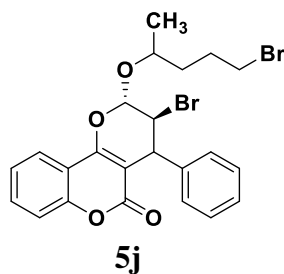

==== CHANNEL f1 =====  
SFO1 400.1324008 MHz  
NUC1 1H  
P1 14.00 usec  
SI 16384  
SF 400.1300102 MHz  
WDW EM  
SSB 0  
LB 0.00 Hz  
GB 0  
PC 1.00

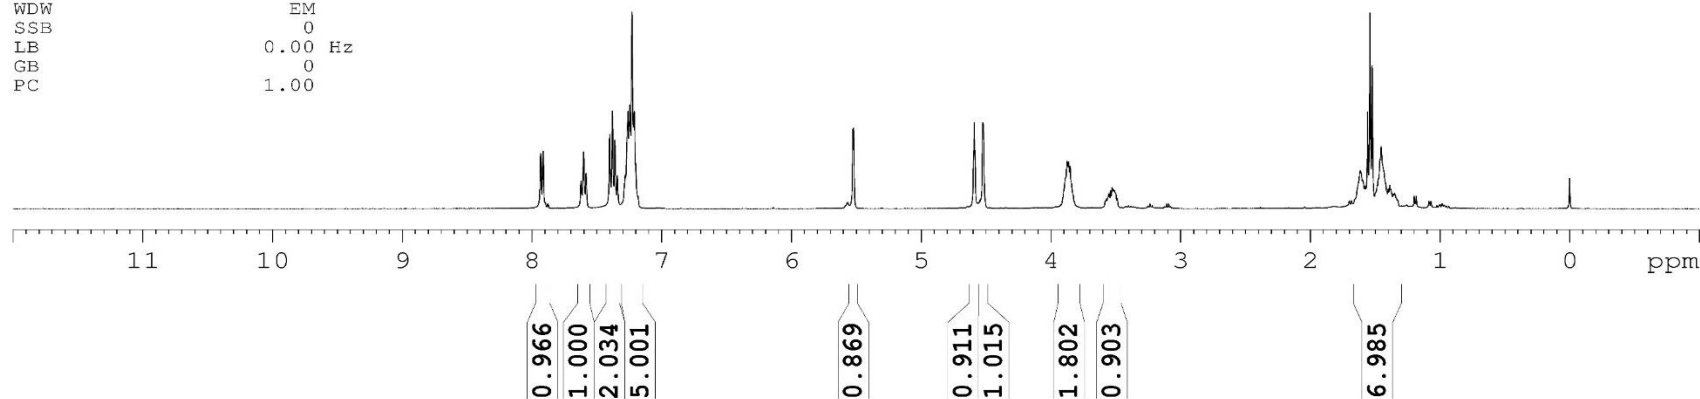

161.447  
 157.235  
 152.926  
 139.659  
 139.593  
 132.233  
 128.298  
 128.195  
 127.837  
 127.079  
 127.013  
 124.121  
 122.714  
 116.821  
 114.990  
 101.042  
 100.926  
 100.730  
 77.317  
 77.000  
 76.682  
 69.562  
 69.452  
 51.192  
 50.925  
 47.349  
 47.234  
 44.051  
 43.982  
 37.070  
 27.841  
 27.521  
 26.375  
 26.316

DYY-VS-2-196C

NAME DYY-VS-2-196C  
 EXPNO 1  
 PROCNO 1  
 Date\_ 20240611  
 Time 12.32  
 INSTRUM spect  
 PROBHD 5 mm PABBO BB/  
 PULPROG zgpg30  
 TD 65536  
 SOLVENT CDCl3  
 NS 500  
 DS 0  
 SWH 24038.461 Hz  
 FIDRES 0.366798 Hz  
 AQ 1.3631988 sec  
 RG 205.92  
 DW 20.800 usec  
 DE 6.50 usec  
 TE 296.9 K  
 D1 2.00000000 sec  
 D11 0.03000000 sec  
 TD0 1

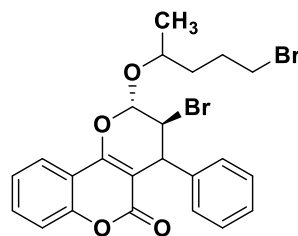

5j

===== CHANNEL f1 =====  
 SFO1 100.6233329 MHz  
 NUC1 13C  
 P1 10.00 usec  
 SI 32768  
 SF 100.6127761 MHz  
 WDW EM  
 SSB 0  
 LB 2.00 Hz  
 GB 0  
 PC 1.00

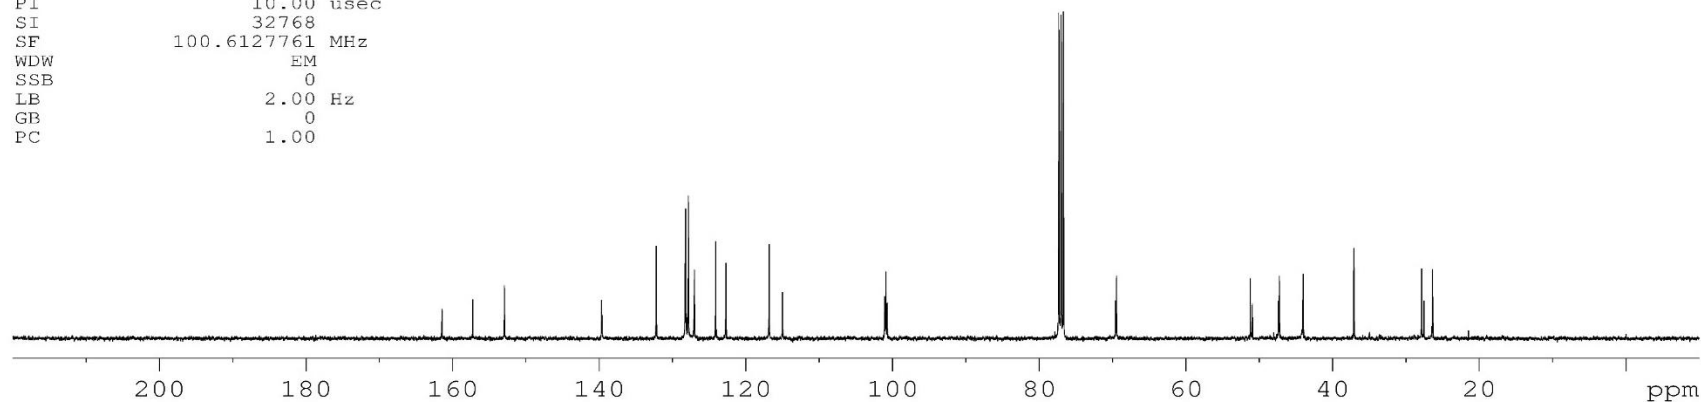

7.932  
7.930  
7.913  
7.910  
7.628  
7.624  
7.606  
7.588  
7.585  
7.405  
7.384  
7.364  
7.346  
7.280  
7.260  
7.251  
7.244  
7.233  
7.224  
7.217  
7.205  
5.523  
5.516  
4.582  
4.576  
4.569  
4.520  
4.514  
3.857  
3.849  
3.842  
3.834  
3.819  
3.519  
3.512  
3.503  
3.496  
3.247  
3.231  
3.214  
1.672  
1.654  
1.636  
1.618  
1.583  
1.383  
1.375  
1.368  
1.359  
1.343  
1.250  
1.180  
1.161  
1.136  
1.114

DYY-VS-3-230

NAME DYY-VS-3-230  
EXPNO 1  
PROCNO 1  
Date\_ 20240531  
Time 10.19  
INSTRUM spect  
PROBHD 5 mm PABBO BB/  
PULPROG zg30  
ID 65536  
SOLVENT CDCl3  
NS 16  
DS 0  
SWH 8012.820 Hz  
FIDRES 0.122266 Hz  
AQ 4.0894966 sec  
RG 205.92  
DW 62.400 usec  
DE 16.53 usec  
TE 290.4 K  
D1 2.00000000 sec  
TD0 1

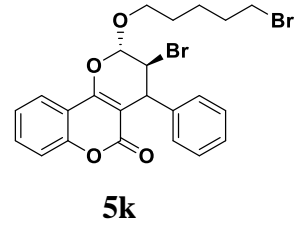

==== CHANNEL f1 =====  
SFO1 400.1324008 MHz  
NUC1 1H  
P1 14.00 usec  
SI 16384  
SF 400.1300101 MHz  
WDW EM  
SSB 0  
LB 0.00 Hz  
GB 0  
PC 1.00

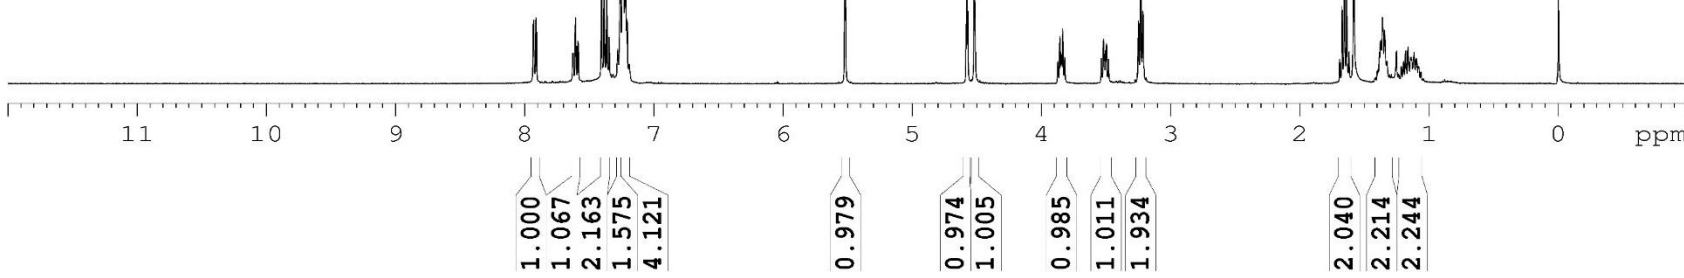

161.460  
 157.264  
 152.892  
 139.617  
 132.200  
 128.157  
 127.871  
 126.981  
 124.098  
 122.691  
 116.799  
 114.995  
 100.958  
 100.748  
 77.318  
 77.000  
 76.683  
 69.939  
 47.368  
 44.077  
 33.392  
 32.148  
 28.348  
 24.381

DYY-VS-3-230C

NAME DYY-VS-3-230C  
 EXPNO 1  
 PROCNO 1  
 Date\_ 20240531  
 Time 11.23  
 INSTRUM spect  
 PROBHD 5 mm PABBO BB/  
 PULPROG zgpg30  
 TD 65536  
 SOLVENT CDC13  
 NS 500  
 DS 0  
 SWH 24038.461 Hz  
 FIDRES 0.366798 Hz  
 AQ 1.3631988 sec  
 RG 205.92  
 DW 20.800 usec  
 DE 6.50 usec  
 TE 292.4 K  
 D1 2.00000000 sec  
 D11 0.03000000 sec  
 TD0 1

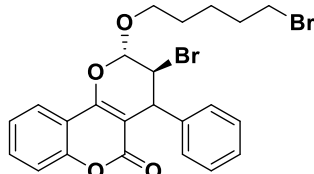

5k

===== CHANNEL f1 =====  
 SFO1 100.6233329 MHz  
 NUC1 13C  
 P1 10.00 usec  
 SI 32768  
 SF 100.6127789 MHz  
 WDW EM  
 SSB 0  
 LB 2.00 Hz  
 GB 0  
 PC 1.00

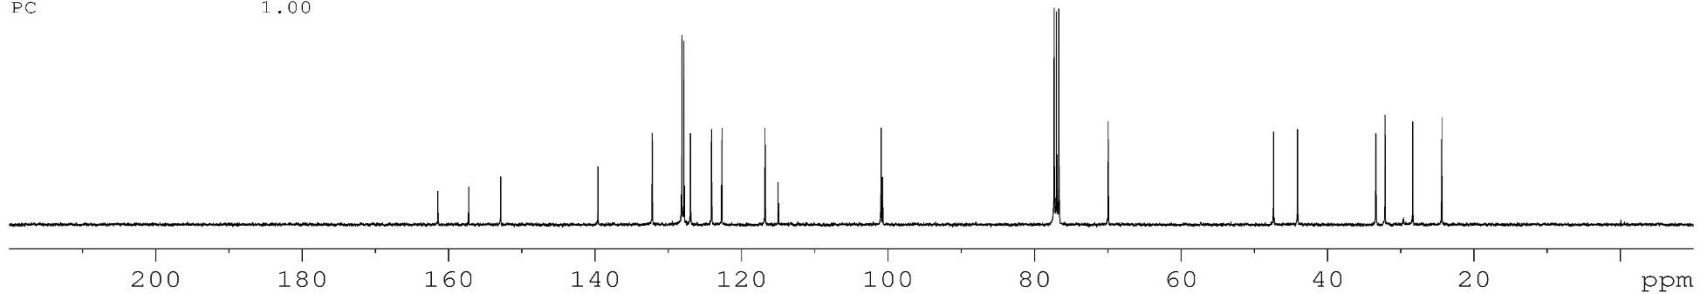

7.926  
7.906  
7.634  
7.616  
7.598  
7.595  
7.408  
7.387  
7.368  
7.349  
7.260  
7.247  
7.226  
7.182  
7.161  
5.524  
5.518  
4.518  
4.512  
4.506  
4.473  
3.876  
3.861  
3.853  
3.847  
3.838  
3.823  
3.552  
3.536  
3.530  
3.520  
3.513  
3.298  
3.290  
3.274  
3.258  
3.242  
3.234  
1.712  
1.694  
1.676  
1.658  
1.641  
1.402  
1.387  
1.376  
1.363  
1.353  
1.215  
1.200  
1.181  
1.162  
1.143  
1.124  
1.107

DYY-VS-3-256-I

NAME DYY-VS-3-256-I  
EXPNO 1  
PROCNO 1  
Date\_ 20240709  
Time 10.20  
INSTRUM spect  
PROBHD 5 mm PABBO BB/  
PULPROG zg30  
TD 65536  
SOLVENT CDCl3  
NS 16  
DS 0  
SWH 8012.820 Hz  
FIDRES 0.122266 Hz  
AQ 4.0894966 sec  
RG 205.92  
DW 62.400 usec  
DE 16.53 usec  
TE 294.7 K  
D1 2.0000000 sec  
TD0 1

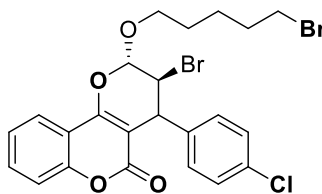

51

==== CHANNEL f1 =====  
SFO1 400.1324008 MHz  
NUC1 1H  
P1 14.00 usec  
SI 16384  
SF 400.1300100 MHz  
WDW EM  
SSB 0  
LB 0.00 Hz  
GB 0  
PC 1.00

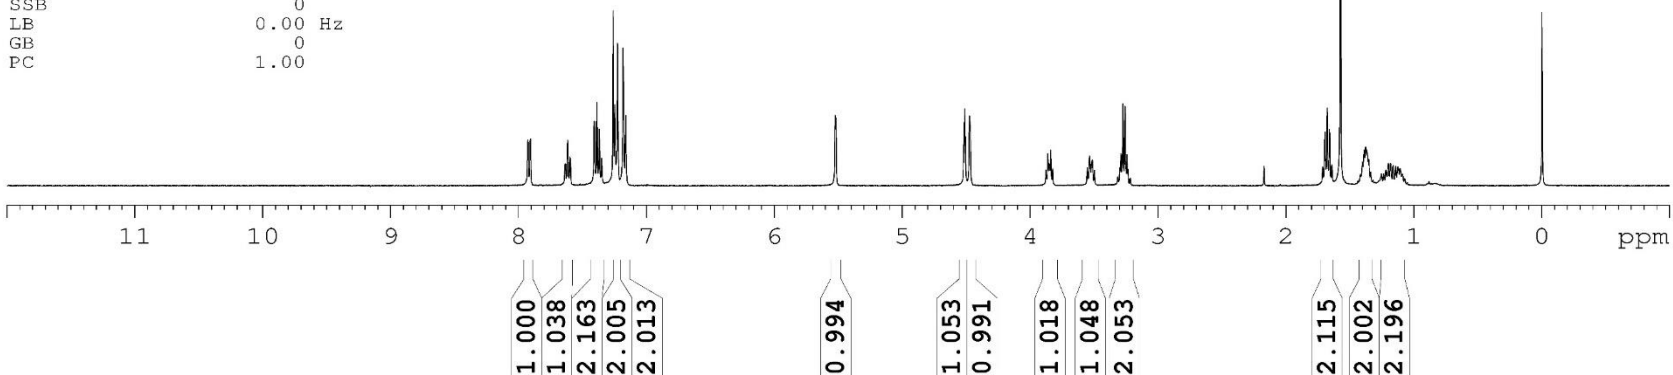

DYY-VS-3-256-IC

NAME DYY-VS-3-256-IC  
EXPNO 1  
PROCNO 1  
Date\_ 20240709  
Time 10.57  
INSTRUM spect  
PROBHD 5 mm PABBO BB/  
PULPROG zgpg30  
TD 65536  
SOLVENT CDCl3  
NS 275  
DS 0  
SWH 24038.461 Hz  
FIDRES 0.366798 Hz  
AQ 1.3631988 sec  
RG 205.92  
DW 20.800 usec  
DE 6.50 usec  
TE 295.8 K  
D1 2.00000000 sec  
D11 0.03000000 sec  
TD0 1

161.421  
157.442  
152.973

138.324  
132.768  
132.406  
129.351  
128.347  
124.214  
122.753  
116.902  
114.931  
100.935  
100.311

77.318  
77.000  
76.682  
70.162

46.795  
43.521  
33.423  
32.167  
28.469  
24.492

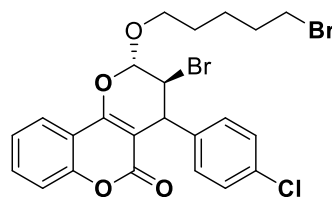

5l

===== CHANNEL f1 =====  
SFO1 100.6233329 MHz  
NUC1 13C  
P1 10.00 usec  
SI 32768  
SF 100.6127738 MHz  
WDW EM  
SSB 0  
LB 2.00 Hz  
GB 0  
PC 1.00

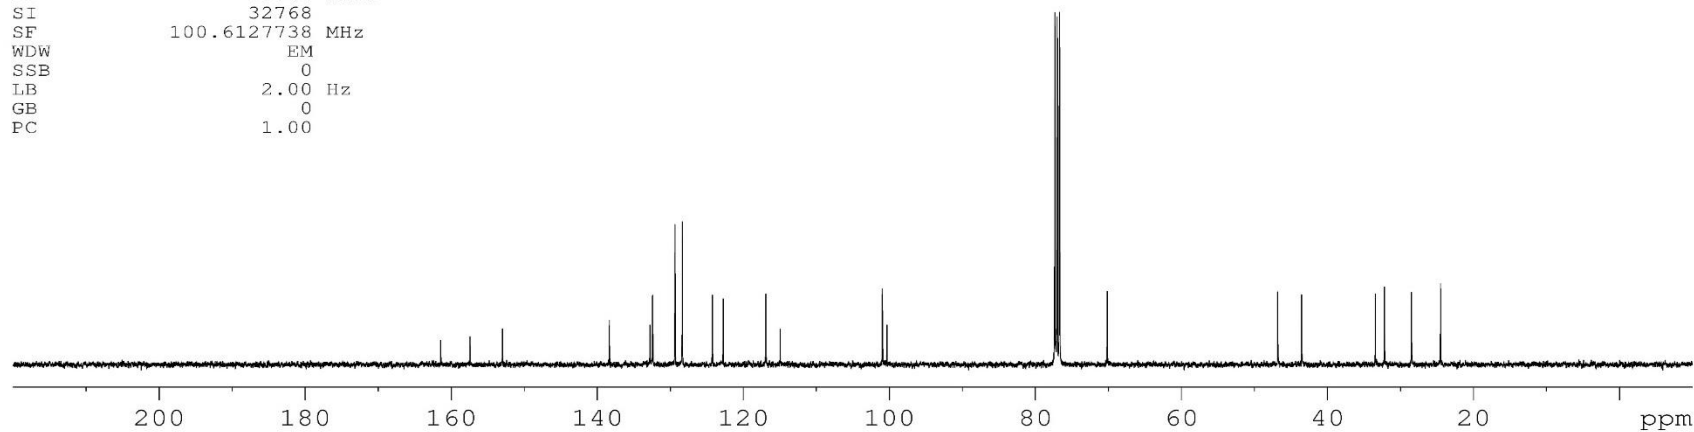



7.885  
7.878  
7.560  
7.554  
7.538  
7.532  
7.347  
7.325  
7.285  
7.281  
7.278  
7.260  
7.246  
7.226  
7.216  
7.197  
5.528  
5.523  
4.584  
4.578  
4.572  
4.509  
3.878  
3.863  
3.854  
3.848  
3.840  
3.825  
3.535  
3.518  
3.512  
3.503  
3.495  
3.260  
3.253  
3.243  
3.236  
3.227  
3.219  
1.692  
1.674  
1.656  
1.638  
1.620  
1.380  
1.371  
1.365  
1.356  
1.351  
1.341  
1.334  
1.176  
1.158  
1.130  
1.109

DYY-VS-3-235

NAME DYY-VS-3-235  
EXPNO 1  
PROCNO 1  
Date\_ 20240604  
Time 10.30  
INSTRUM spect  
PROBHD 5 mm PABBO BB/  
PULPROG zg30  
TD 65536  
SOLVENT CDC13  
NS 16  
DS 0  
SWH 8012.820 Hz  
FIDRES 0.122266 Hz  
AQ 4.0894966 sec  
RG 205.92  
DW 62.400 usec  
DE 16.53 usec  
TE 292.8 K  
D1 2.00000000 sec  
TD0 1

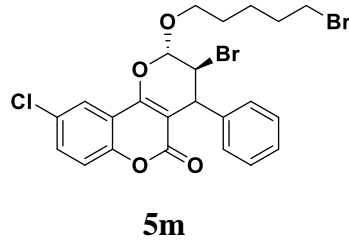

==== CHANNEL f1 =====  
SF01 400.1324008 MHz  
NUC1 1H  
P1 14.00 usec  
SI 16384  
SF 400.1300098 MHz  
WDW EM  
SSB 0  
LB 0.00 Hz  
GB 0  
PC 1.00

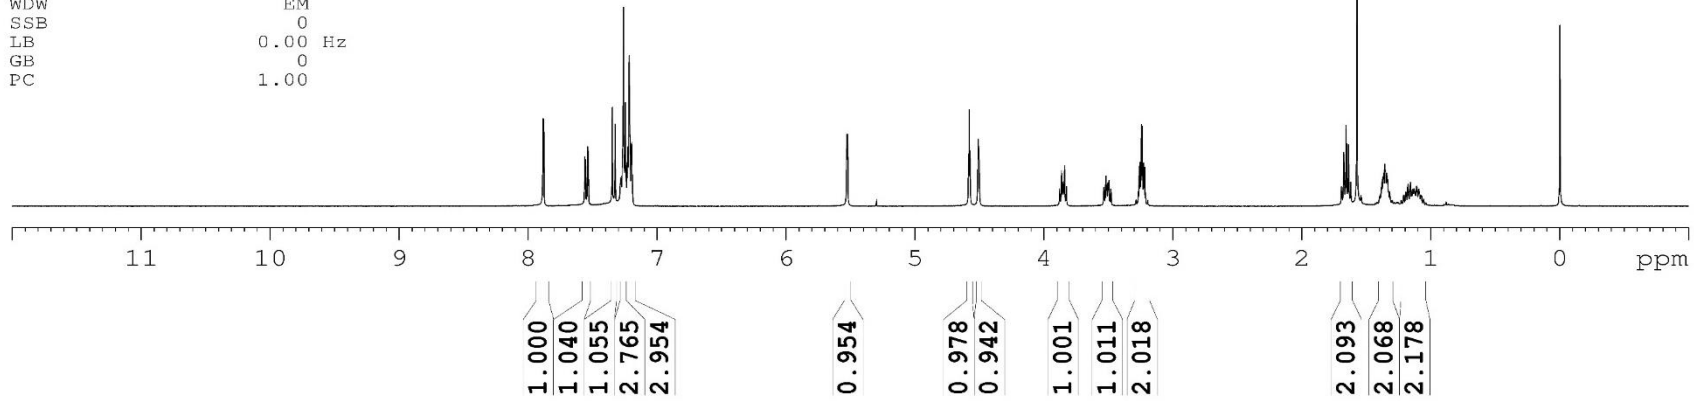

DYY-VS-3-235C

NAME DYY-VS-3-235C  
EXPNO 1  
PROCNO 1  
Date\_ 20240604  
Time 11.27  
INSTRUM spect  
PROBHD 5 mm PABBO BB/  
PULPROG zgpg30  
TD 65536  
SOLVENT CDC13  
NS 600  
DS 0  
SWH 24038.461 Hz  
FIDRES 0.366798 Hz  
AQ 1.3631988 sec  
RG 205.92  
DW 20.800 usec  
DE 6.50 usec  
TE 295.3 K  
D1 2.00000000 sec  
D11 0.03000000 sec  
TD0 1

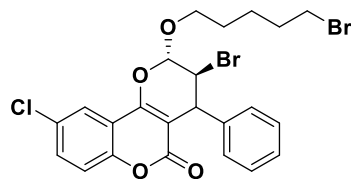

5m

==== CHANNEL f1 =====  
SFO1 100.6233329 MHz  
NUC1 13C  
P1 10.00 usec  
SI 32768  
SF 100.6127751 MHz  
WDW EM  
SSB 0  
LB 2.00 Hz  
GB 0  
PC 1.00

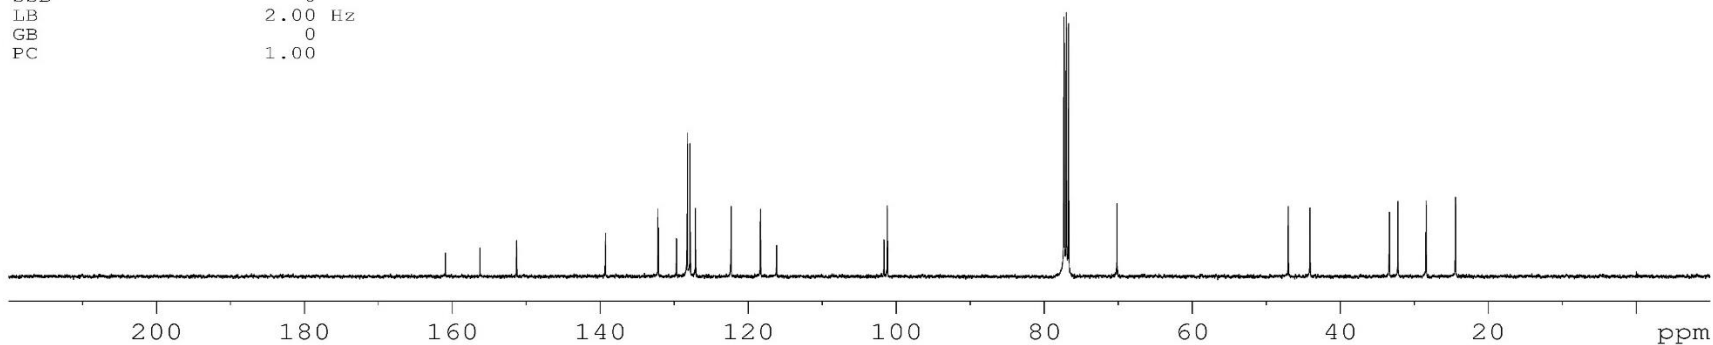

7.951  
7.947  
7.931  
7.928  
7.632  
7.629  
7.614  
7.611  
7.593  
7.589  
7.409  
7.387  
7.367  
7.349  
7.347  
7.287  
7.282  
7.266  
7.260  
7.251  
7.227  
7.219  
7.209  
5.549  
5.543  
4.606  
4.600  
4.593  
4.534  
4.529  
4.001  
3.990  
3.988  
3.977  
3.964  
3.675  
3.660  
3.651  
3.645  
3.636  
3.023  
3.013  
3.007  
2.998  
2.982  
2.947  
2.931  
2.915  
2.906  
1.853  
1.838  
1.823  
1.809  
1.587

DYY-VS-3-245-1

NAME DYY-VS-3-245-1  
EXPNO 1  
PROCNO 1  
Date\_ 20240618  
Time 10.17  
INSTRUM spect  
PROBHD 5 mm PABBO BB/  
PULPROG zg30  
TD 65536  
SOLVENT CDCl3  
NS 16  
DS 0  
SWH 8012.820 Hz  
FIDRES 0.122266 Hz  
AQ 4.0894966 sec  
RG 205.92  
DW 62.400 usec  
DE 16.53 usec  
TE 291.9 K  
D1 2.00000000 sec  
TDO 1

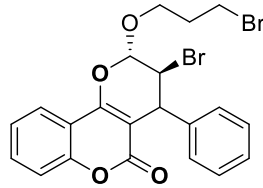

5n

==== CHANNEL f1 =====  
SFO1 400.1324008 MHz  
NUC1 1H  
P1 14.00 usec  
SI 16384  
SF 400.1300098 MHz  
WDW EM  
SSB 0  
LB 0.00 Hz  
GB 0  
PC 1.00

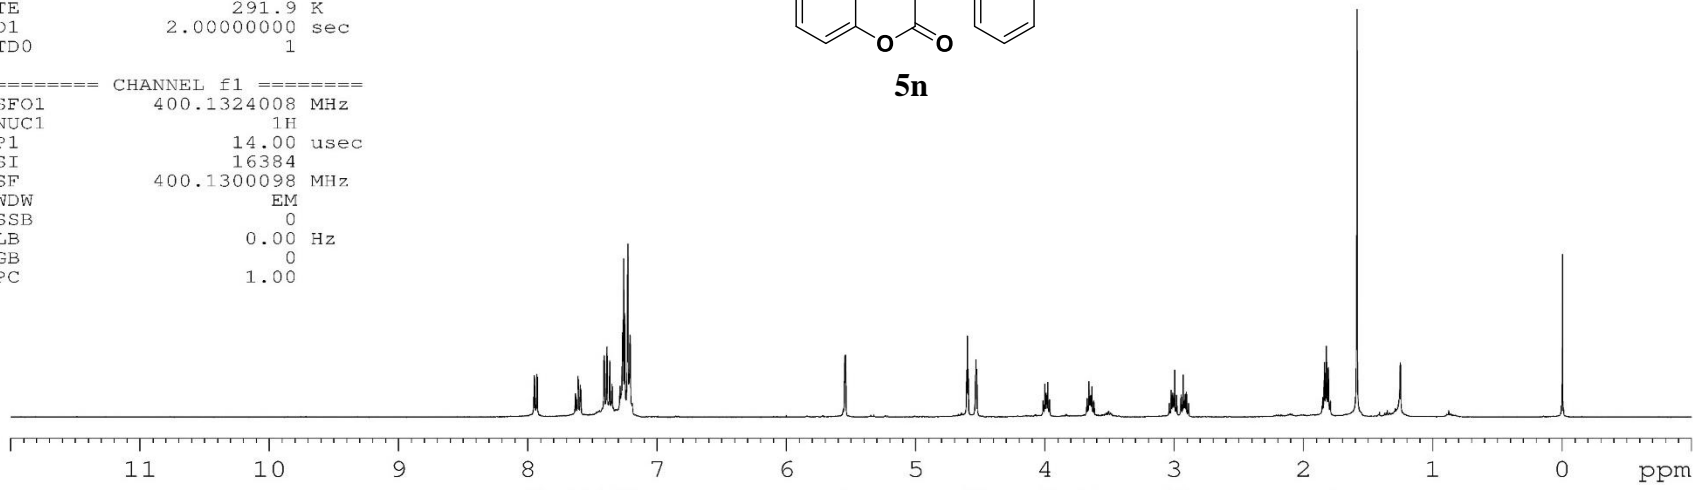

1.000  
1.104  
2.352  
2.631  
2.950  
0.949  
0.977  
0.946  
0.971  
1.056  
1.025  
0.961  
2.001

DYY-VS-245-1C

NAME DYY-VS-3-245-1C  
EXPNO 1  
PROCNO 1  
Date\_ 20240618  
Time 12.16  
INSTRUM spect  
PROBHD 5 mm PABBO BB/  
PULPROG zgpg30  
TD 65536  
SOLVENT CDC13  
NS 570  
DS 0  
SWH 24038.461 Hz  
FIDRES 0.366798 Hz  
AQ 1.3631988 sec  
RG 205.92  
DW 20.800 usec  
DE 6.50 usec  
TE 293.1 K  
D1 2.00000000 sec  
D11 0.03000000 sec  
TDO 1

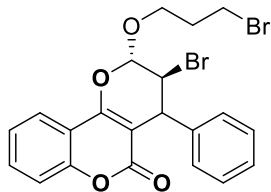

5n

==== CHANNEL f1 =====  
SFO1 100.6233329 MHz  
NUC1 13C  
P1 10.00 usec  
SI 32768  
SF 100.6127685 MHz  
WDW EM  
SSB 0  
LB 2.00 Hz  
GB 0  
PC 1.00

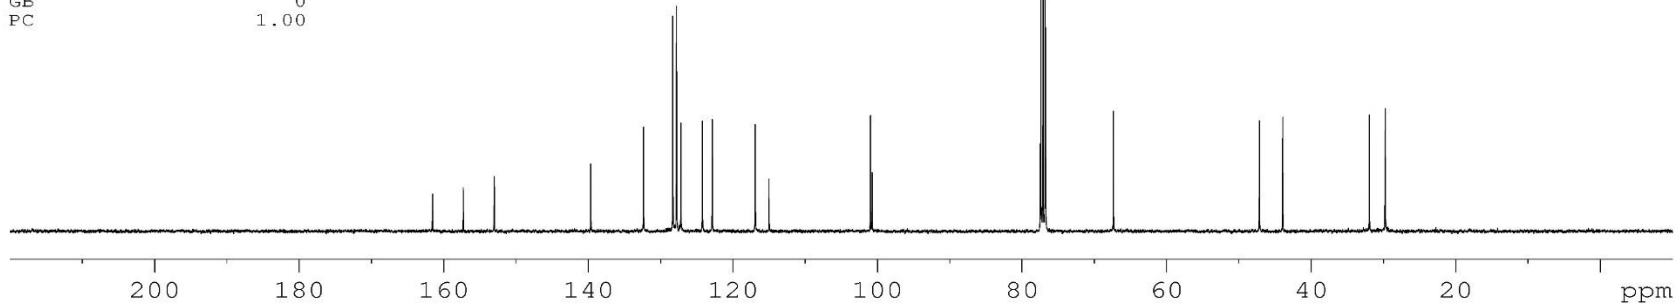

7.943  
7.941  
7.924  
7.623  
7.620  
7.602  
7.584  
7.581  
7.399  
7.380  
7.362  
7.343  
7.279  
7.260  
7.243  
7.234  
7.223  
7.218  
7.204  
5.535  
5.529  
4.589  
4.583  
4.576  
4.519  
4.515  
3.946  
3.932  
3.923  
3.918  
3.909  
3.894  
3.632  
3.614  
3.610  
3.599  
3.595  
3.577  
3.414  
3.398  
3.381  
3.368  
3.353  
3.339  
3.145  
3.136  
3.131  
3.122  
3.107  
3.075  
3.059  
3.051  
3.043  
3.036  
2.005  
1.990  
1.974  
1.959  
1.944  
1.619  
1.604  
1.590  
1.575  
1.560  
1.546

DYY-VS-3-245B

NAME DYY-VS-3-245B  
EXPNO 1  
PROCNO 1  
Date\_ 20240719  
Time 11.13  
INSTRUM spect  
PROBHD 5 mm PABBO BB/  
PULPROG zg30  
TD 65536  
SOLVENT CDC13  
NS 16  
DS 0  
SWH 8012.820 Hz  
FIDRES 0.122266 Hz  
AQ 4.0894966 sec  
RG 55.28  
DW 62.400 usec  
DE 16.53 usec  
TE 291.5 K  
D1 2.00000000 sec  
TD0 1

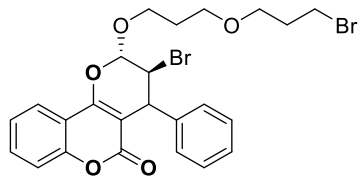

50

==== CHANNEL f1 =====  
SFO1 400.1324008 MHz  
NUC1 1H  
P1 14.00 usec  
SI 16384  
SF 400.1300099 MHz  
WDW EM  
SSB 0  
LB 0.00 Hz  
GB 0  
PC 1.00

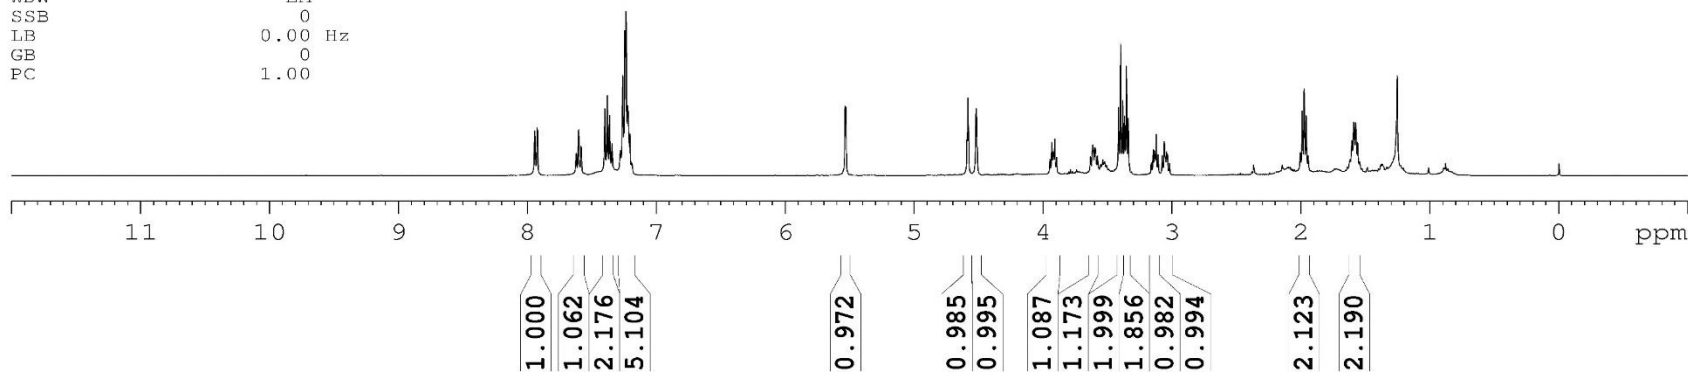

DYY-VS-3-245B-C

NAME DYY-VS-3-245B-C  
EXPNO 1  
PROCNO 1  
Date\_ 20240719  
Time 11.03  
INSTRUM spect  
PROBHD 5 mm PABBO BB/  
PULPROG zgpg30  
TD 65536  
SOLVENT CDCl3  
NS 180  
DS 0  
SWH 24038.461 Hz  
FIDRES 0.366798 Hz  
AQ 1.3631988 sec  
RG 205.92  
DW 20.800 usec  
DE 6.50 usec  
TE 292.5 K  
D1 2.00000000 sec  
D11 0.03000000 sec  
TD0 1

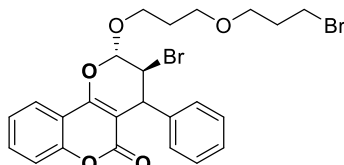

50

==== CHANNEL f1 =====  
SFO1 100.6233329 MHz  
NUC1 13C  
P1 10.00 usec  
SI 32768  
SF 100.6127762 MHz  
WDW EM  
SSB 0  
LB 2.00 Hz  
GB 0  
PC 1.00

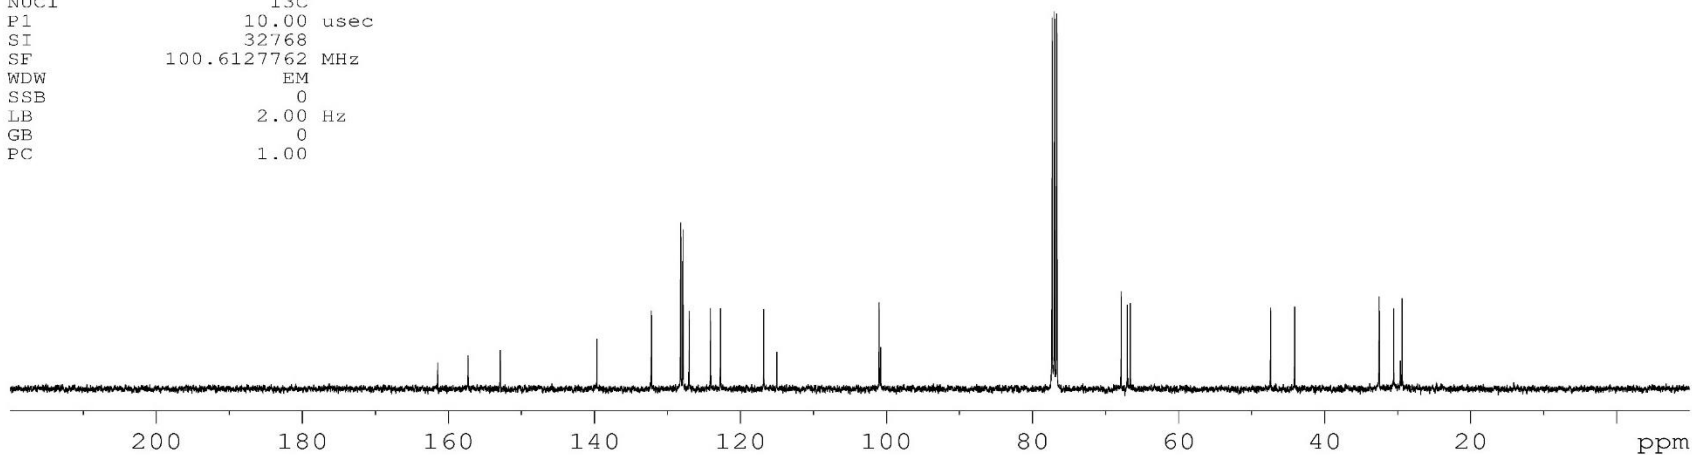

7.908  
7.902  
7.564  
7.558  
7.542  
7.536  
7.351  
7.328  
7.290  
7.273  
7.260  
7.255  
7.234  
7.216  
7.209  
7.190  
5.554  
5.550  
4.607  
4.601  
4.596  
4.522  
4.020  
4.007  
3.996  
3.983  
3.970  
3.675  
3.660  
3.651  
3.645  
3.636  
3.622  
3.017  
3.002  
2.992  
2.987  
2.977  
2.962  
2.928  
2.912  
2.903  
2.896  
2.887  
2.871  
1.833  
1.819  
1.804

DYY-VS-3-247-1

NAME DYY-VS-3-247-1  
EXPNO 1  
PROCNO 1  
Date\_ 20240625  
Time 10.24  
INSTRUM spect  
PROBHD 5 mm PABBO BB/  
PULPROG zq30  
TD 65536  
SOLVENT CDCl3  
NS 16  
DS 0  
SWH 8012.820 Hz  
FIDRES 0.122266 Hz  
AQ 4.0894966 sec  
RG 163.06  
DW 62.400 usec  
DE 16.53 usec  
TE 293.1 K  
D1 2.00000000 sec  
TD0 1

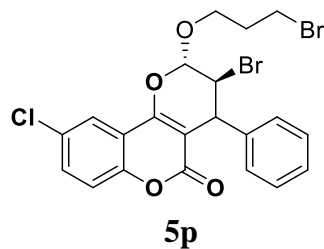

==== CHANNEL f1 =====  
SFO1 400.1324008 MHz  
NUC1 1H  
P1 14.00 usec  
SI 16384  
SF 400.1300097 MHz  
WDW EM  
SSB 0  
LB 0.00 Hz  
GB 0  
PC 1.00

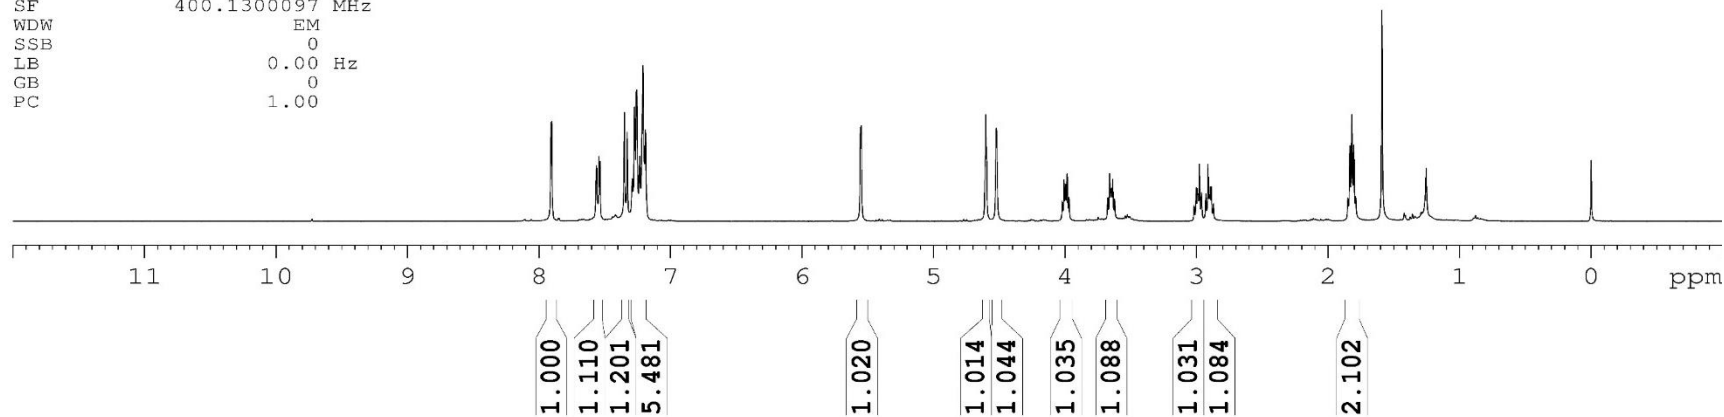

DYY-VS-3-247-1C

NAME DYY-VS-3-247-1C  
EXPNO 1  
PROCNO 1  
Date\_ 20240625  
Time\_ 11.10  
INSIRUM spect  
PROBHD 5 mm PABBO BB/  
PULPROG zgpg30  
TD 65536  
SOLVENT CDC13  
NS 202  
DS 0  
SWH 24038.461 Hz  
FIDRES 0.366798 Hz  
AQ 1.3631988 sec  
RG 205.92  
DW 20.800 usec  
DE 6.50 usec  
TE 293.5 K  
D1 2.00000000 sec  
D11 0.03000000 sec  
TD0 1

==== CHANNEL f1 =====  
SFO1 100.6233329 MHz  
NUC1 13C  
P1 10.00 usec  
SI 32768  
SF 100.6127764 MHz  
WDW EM  
SSB 0  
LB 2.00 Hz  
GB 0  
PC 1.00

160.928  
156.179  
151.271  
139.244  
132.250  
129.742  
128.292  
127.665  
127.216  
122.381  
118.316  
116.038  
101.512  
101.047  
77.318  
77.000  
76.683  
67.396  
46.690  
43.769  
31.788  
29.568

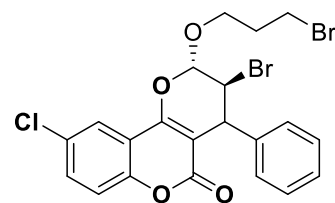

5p

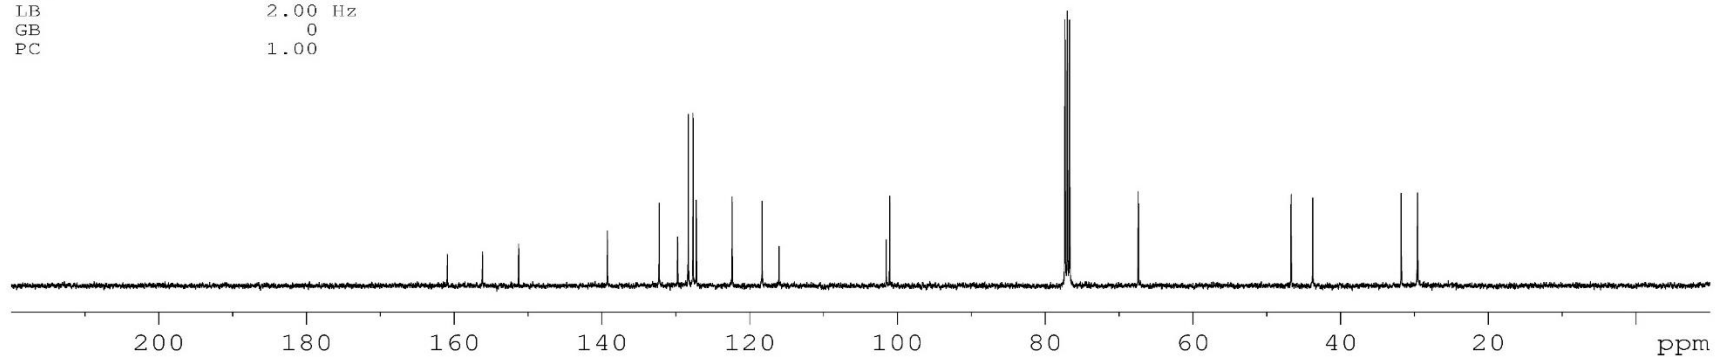



7.896  
7.890  
7.559  
7.553  
7.537  
7.531  
7.345  
7.323  
7.281  
7.260  
7.246  
7.227  
7.217  
7.198  
5.541  
5.535  
4.589  
4.583  
4.577  
4.507  
4.503  
3.954  
3.939  
3.931  
3.925  
3.917  
3.902  
3.635  
3.620  
3.617  
3.613  
3.603  
3.599  
3.594  
3.580  
3.431  
3.415  
3.399  
3.376  
3.363  
3.350  
3.142  
3.133  
3.127  
3.118  
3.103  
3.062  
3.047  
3.039  
3.031  
3.023  
2.019  
2.004  
1.989  
1.974  
1.958  
1.602  
1.572  
1.556

DYY-VS-3-247B

NAME DYY-VS-3-247B  
EXPNO 1  
PROCNO 1  
Date\_ 20240716  
Time 10.11  
INSTRUM spect  
PROBHD 5 mm PABBO BB/  
PULPROG zg30  
TD 65536  
SOLVENT CDC13  
NS 16  
DS 0  
SWH 8012.820 Hz  
FIDRES 0.122266 Hz  
AQ 4.0894966 sec  
RG 181.8  
DW 62.400 usec  
DE 16.53 usec  
TE 291.2 K  
D1 2.00000000 sec  
TD0 1

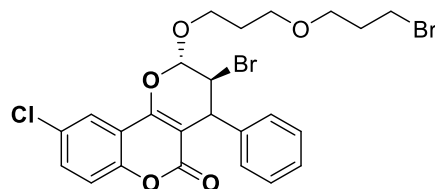

5q

==== CHANNEL f1 =====  
SFO1 400.1324008 MHz  
NUC1 1H  
P1 14.00 usec  
SI 16384  
SF 400.1300100 MHz  
WDW EM  
SSB 0  
LB 0.00 Hz  
GB 0  
PC 1.00

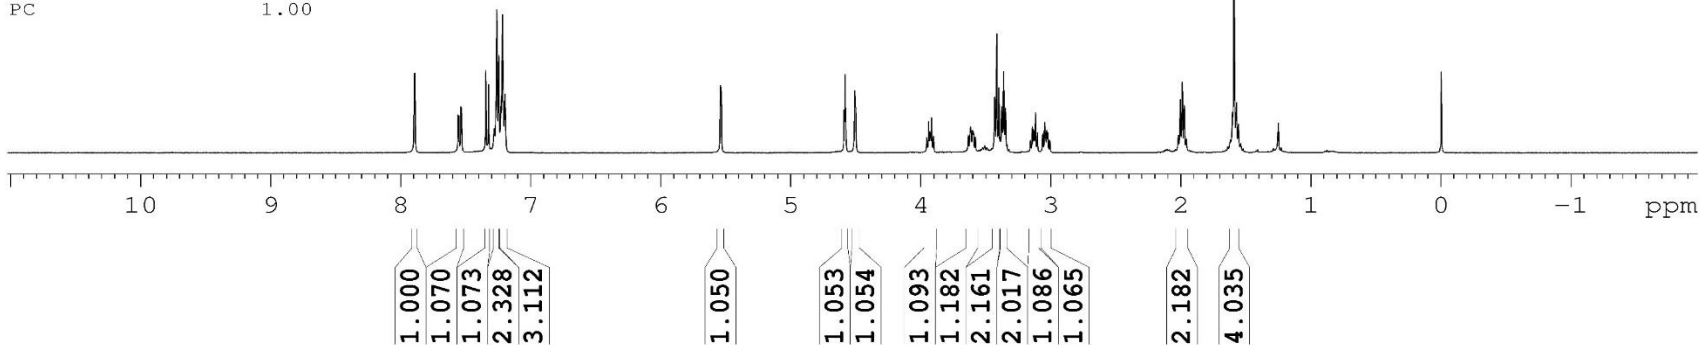

DYY-VS-3-247B-C

NAME DYY-VS-3-247B-C  
EXPNO 1  
PROCNO 1  
Date\_ 20240716  
Time 10.54  
INSTRUM spect  
PROBHD 5 mm PABBO BB/  
PULPROG zgpg30  
TD 65536  
SOLVENT CDC13  
NS 180  
DS 0  
SWH 24038.461 Hz  
FIDRES 0.366798 Hz  
AQ 1.3631988 sec  
RG 205.92  
DW 20.800 usec  
DE 6.50 usec  
TE 292.1 K  
D1 2.00000000 sec  
D11 0.03000000 sec  
TDO 1

==== CHANNEL f1 =====  
SFO1 100.6233329 MHz  
NUC1 13C  
P1 10.00 usec  
SI 32768  
SF 100.6127741 MHz  
WDW EM  
SSB 0  
LB 2.00 Hz  
GB 0  
PC 1.00

160.945  
156.279  
151.303  
139.334  
132.198  
129.708  
128.255  
127.853  
127.159  
122.369  
118.336  
116.178  
101.649  
101.199  
77.317  
77.000  
76.682  
67.857  
67.177  
66.540  
47.025  
44.064  
32.526  
30.559  
29.373

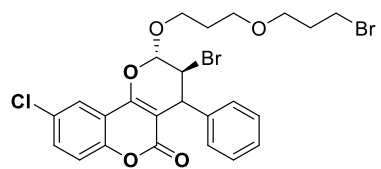

5q

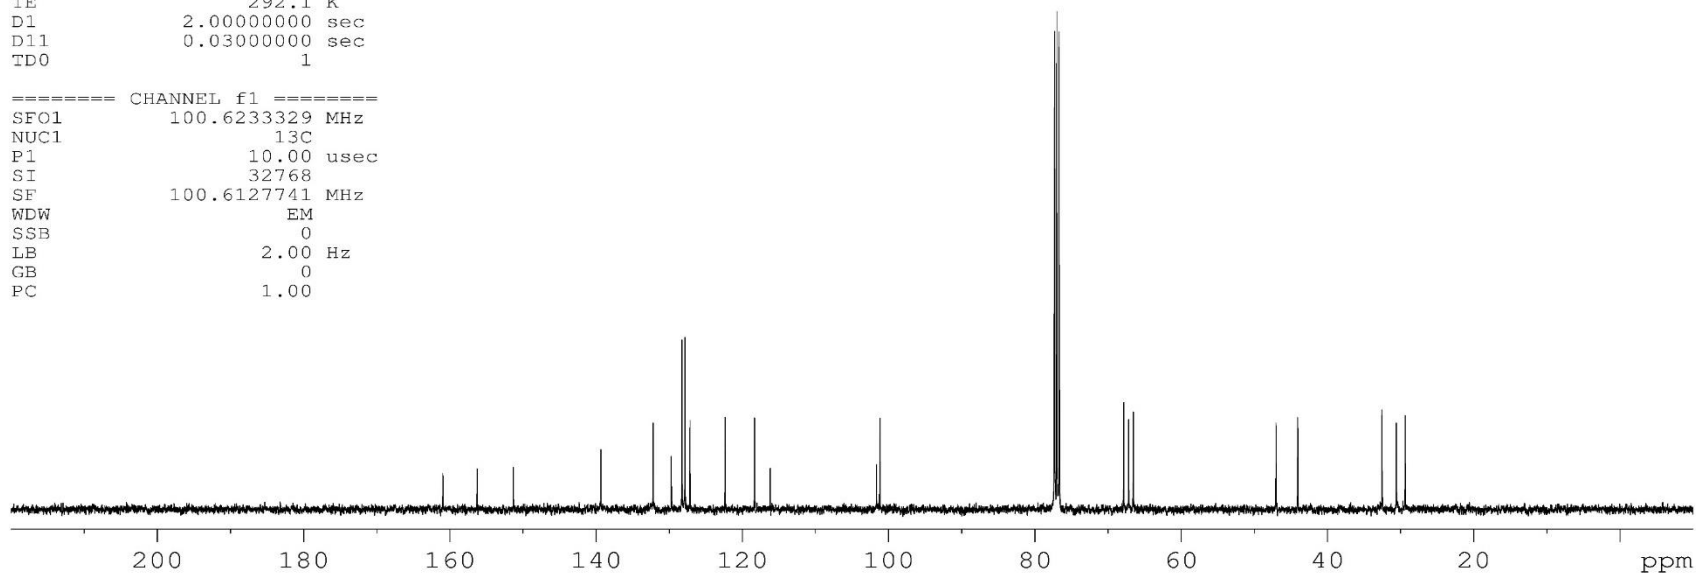

DYY-VS-3-255-1

NAME DYY-VS-3-255-1  
EXPNO 1  
PROCNO 1  
Date\_ 20240705  
Time 10.14  
INSTRUM spect  
PROBHD 5 mm PABBO BB/  
PULPROG zg30  
TD 65536  
SOLVENT CDCl3  
NS 16  
DS 0  
SWH 8012.820 Hz  
FIDRES 0.122266 Hz  
AQ 4.0894966 sec  
RG 205.92  
DW 62.400 usec  
DE 16.53 usec  
TE 289.7 K  
D1 2.00000000 sec  
TD0 1

===== CHANNEL f1 =====  
SFO1 400.1324008 MHz  
NUC1 1H  
P1 14.00 usec  
SI 16384  
SF 400.1300101 MHz  
WDW EM  
SSB 0  
LB 0.00 Hz  
GB 0  
PC 1.00

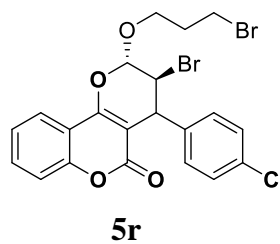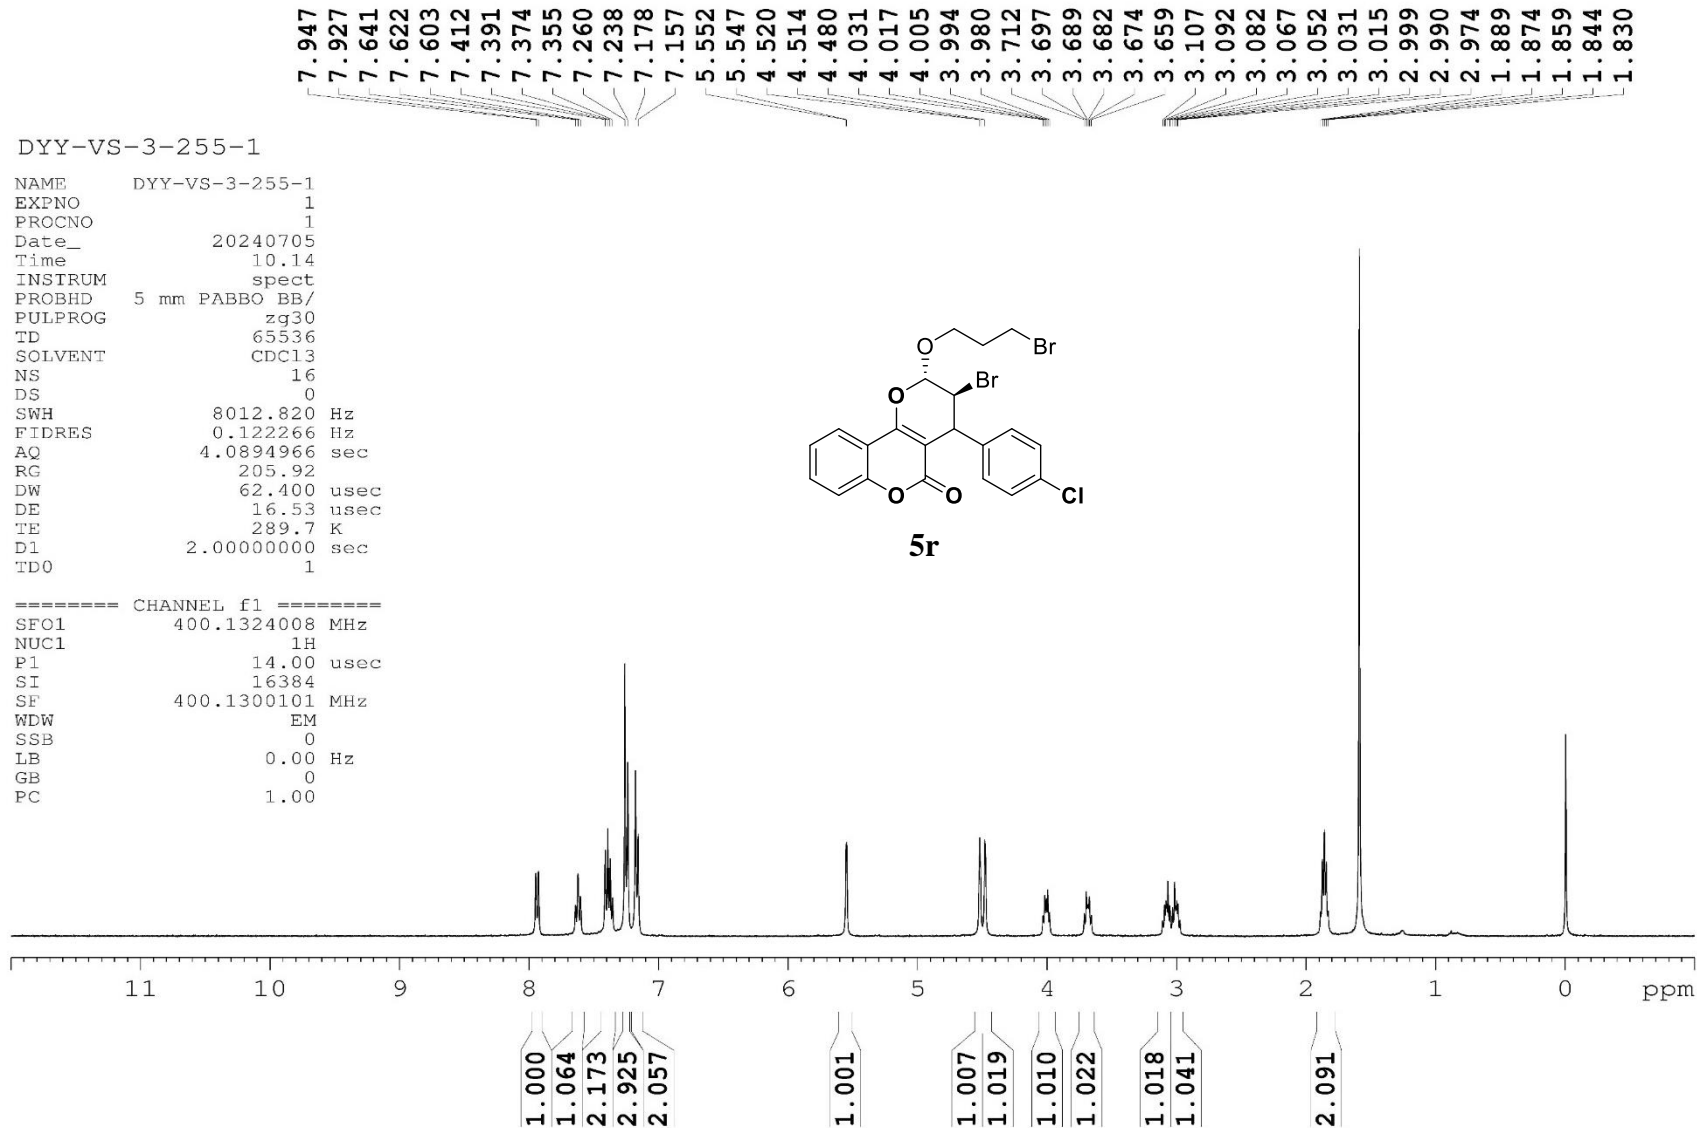

DYY-VS-3-255-1C

NAME DYY-VS-3-255-1C  
EXPNO 1  
PROCNO 1  
Date\_ 20240705  
Time 11.01  
INSTRUM spect  
PROBHD 5 mm PABBO BB/  
PULPROG zgpg30  
TD 65536  
SOLVENT CDC13  
NS 300  
DS 0  
SWH 24038.461 Hz  
FIDRES 0.366798 Hz  
AQ 1.3631988 sec  
RG 205.92  
DW 20.800 usec  
DE 6.50 usec  
TE 291.2 K  
D1 2.00000000 sec  
D11 0.03000000 sec  
TD0 1

==== CHANNEL f1 =====  
SF01 100.6233329 MHz  
NUC1 13C  
P1 10.00 usec  
SI 32768  
SF 100.6127761 MHz  
WDW EM  
SSB 0  
LB 2.00 Hz  
GB 0  
PC 1.00

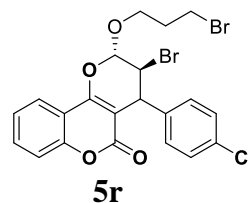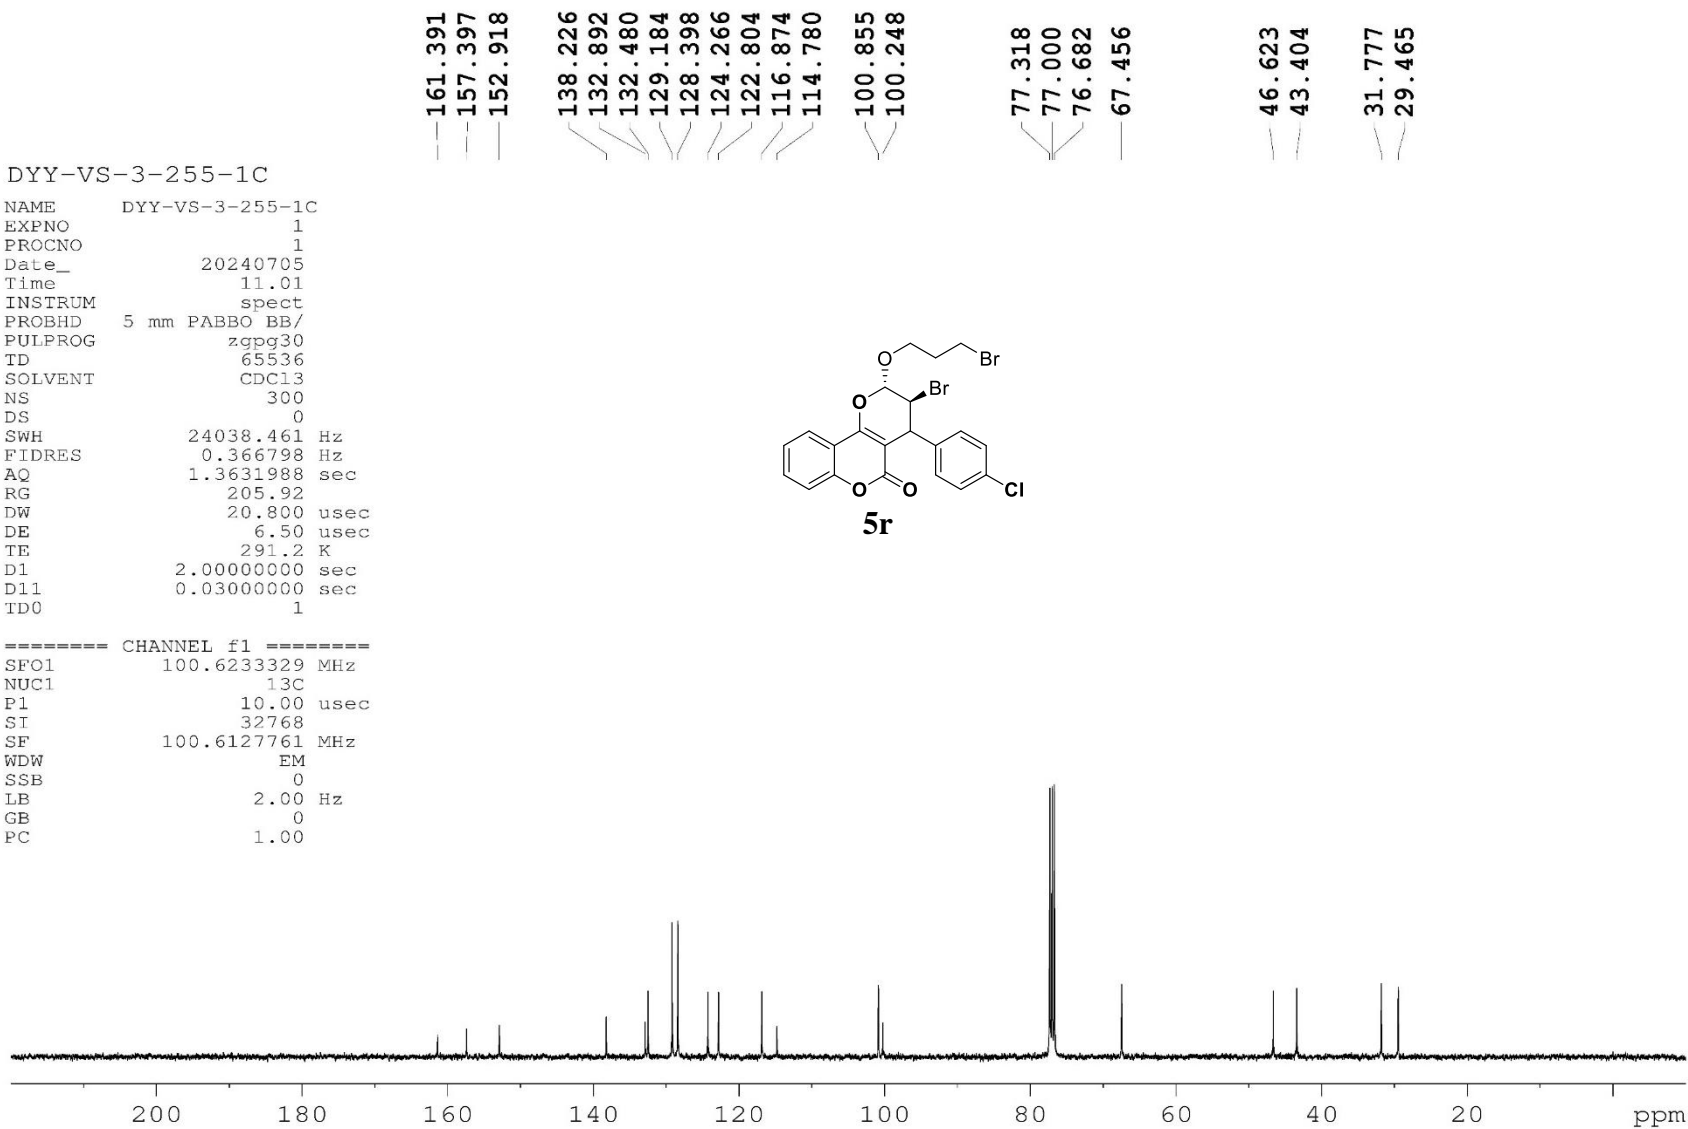

7.940  
7.939  
7.921  
7.635  
7.633  
7.614  
7.596  
7.594  
7.405  
7.386  
7.369  
7.351  
7.260  
7.247  
7.226  
7.186  
7.165  
5.539  
5.533  
4.520  
4.514  
4.508  
4.471  
3.933  
3.925  
3.919  
3.910  
3.896  
3.636  
3.621  
3.616  
3.598  
3.425  
3.409  
3.392  
3.375  
3.361  
3.169  
3.160  
3.155  
3.146  
3.131  
3.110  
3.095  
3.078  
3.072  
2.008  
1.978  
1.963  
1.631  
1.615  
1.594  
1.568

DYY-VS-3-255B-1

NAME DYY-VS-3-255B-1  
EXPNO 1  
PROCNO 1  
Date\_ 20240716  
Time 11.59  
INSTRUM spect  
PROBHD 5 mm PABBO BB/  
PULPROG zg30  
TD 65536  
SOLVENT CDCl3  
NS 16  
DS 0  
SWH 8012.820 Hz  
FIDRES 0.122266 Hz  
AQ 4.0894966 sec  
RG 163.06  
DW 62.400 usec  
DE 16.53 usec  
TE 291.4 K  
D1 2.00000000 sec  
TDC 1

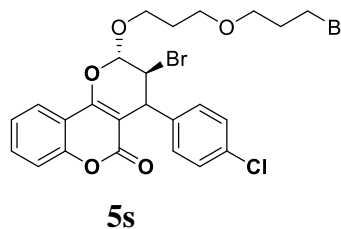

==== CHANNEL f1 =====  
SF01 400.1324008 MHz  
NUC1 1H  
P1 14.00 usec  
SI 16384  
SF 400.1300101 MHz  
WDW EM  
SSB 0  
LB 0.00 Hz  
GB 0  
PC 1.00

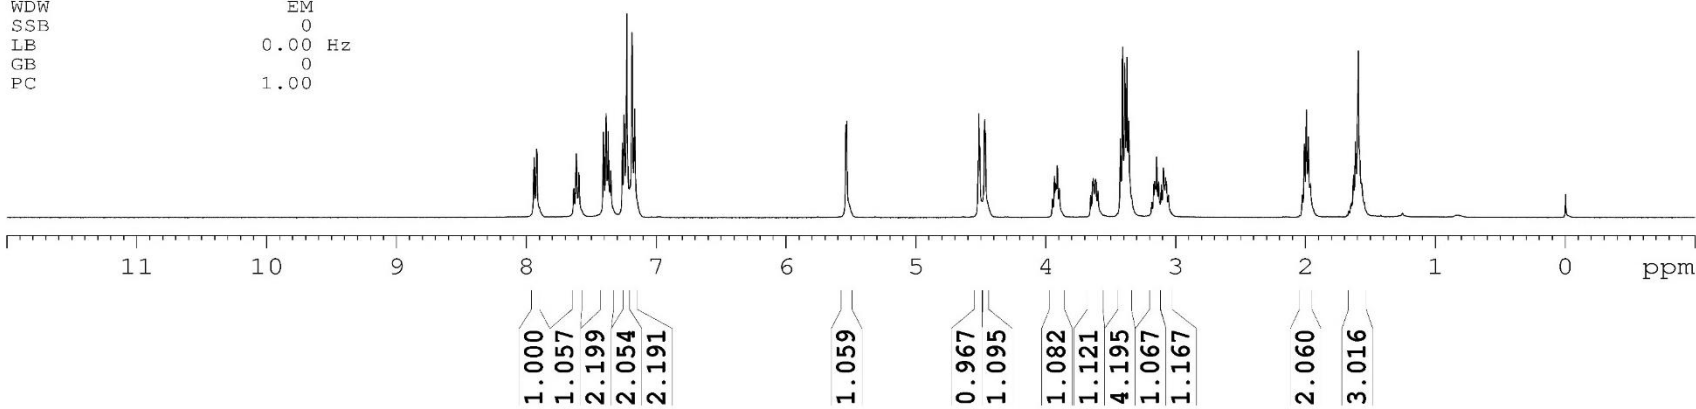

DYY-VS-3-255B-C

NAME DYY-VS-3-255B-C  
EXPNO 1  
PROCNO 1  
Date\_ 20240716  
Time 11.08  
INSTRUM spect  
PROBHD 5 mm PABBO BB/  
PULPROG zgpg30  
TD 65536  
SOLVENT CDC13  
NS 900  
DS 0  
SWH 24038.461 Hz  
FIDRES 0.366798 Hz  
AQ 1.3631988 sec  
RG 205.92  
DW 20.800 usec  
DE 6.50 usec  
TE 292.3 K  
D1 2.00000000 sec  
D11 0.03000000 sec  
TD0 1

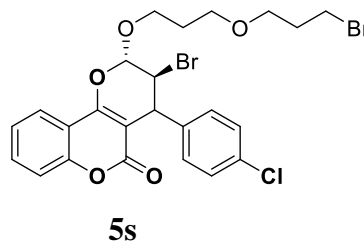

161.439  
157.473  
152.958  
138.340  
132.784  
132.419  
129.353  
128.358  
124.222  
122.805  
116.896  
114.925  
100.927  
100.313  
77.318  
77.000  
76.683  
67.952  
67.223  
66.617  
46.819  
43.556  
32.551  
30.529  
29.455

==== CHANNEL f1 =====  
SFO1 100.6233329 MHz  
NUC1 13C  
P1 10.00 usec  
SI 32768  
SF 100.6127736 MHz  
WDW EM  
SSB 0  
LB 2.00 Hz  
GB 0  
PC 1.00

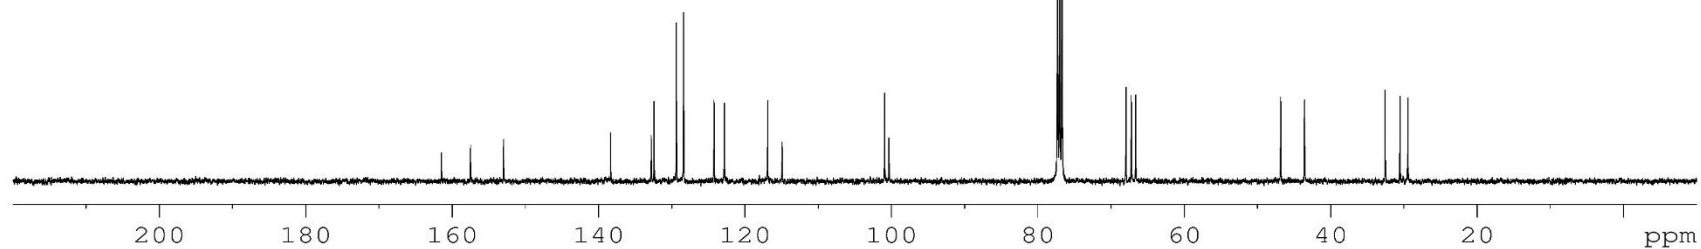

Supplement: d4ob01353k1.pdf [file d4ob01353k1.pdf]
